# Supplementary material for: Design, Synthesis and Biological Evaluation of Biphenylglyoxamide-Based Small Molecular Antimicrobial Peptide Mimics as Antibacterial Agents
Source: PubMed Central journal article supplement (PMC7555970; doi:10.3390/ijms21186789), 2020-09-16

# Design, Synthesis and Biological Evaluation of Biphenylglyoxamide-based Small Molecular Antimicrobial Peptide Mimics as Antibacterial Agents

Tsz Tin Yu <sup>1</sup>, Rajesh Kuppasamy <sup>1</sup>, Muhammad Yasir <sup>2</sup>, Md. Musfizur Hassan <sup>1</sup>, Amani Alghalayini <sup>3</sup>, Satyanarayana Gadde <sup>1</sup>, Evelyne Deplazes <sup>3</sup>, Charles Cranfield <sup>3</sup>, Mark Willcox <sup>2</sup>, David StC Black <sup>1,\*</sup> and Naresh Kumar <sup>1,\*</sup>

<sup>1</sup> School of Chemistry, The University of New South Wales, Sydney, NSW 2052, Australia

<sup>2</sup> School of Optometry and Vision Science, University of New South Wales, Sydney, NSW 2052, Australia

<sup>3</sup> School of Life Sciences, University of Technology Sydney, PO Box 123, Ultimo 2007, Australia

\* Correspondence: d.black@unsw.edu.au; n.kumar@unsw.edu.au

## Contents

|                                                                                                                                  |    |
|----------------------------------------------------------------------------------------------------------------------------------|----|
| Supplementary figures for the antibiofilm activity of compounds <b>15c-15d, 22a-22d</b> .....                                    | 4  |
| <sup>1</sup> H NMR and <sup>13</sup> C NMR spectra of synthesized compounds .....                                                | 6  |
| 5-Phenylindoline-2,3-dione ( <b>7a</b> ).....                                                                                    | 6  |
| 5-(4-Fluorophenyl)indoline-2,3-dione ( <b>7b</b> ) .....                                                                         | 7  |
| 5-(4-Chlorophenyl)indoline-2,3-dione ( <b>7c</b> ) .....                                                                         | 8  |
| 5-(Naphthalen-2-yl)indoline-2,3-dione ( <b>7d</b> ).....                                                                         | 9  |
| 1-(Octylsulfonyl)-5-phenylindoline-2,3-dione ( <b>8a</b> ).....                                                                  | 10 |
| 5-(4-Fluorophenyl)-1-(octylsulfonyl)indoline-2,3-dione ( <b>8b</b> ).....                                                        | 11 |
| 5-(4-Chlorophenyl)-1-(octylsulfonyl)indoline-2,3-dione ( <b>8c</b> ).....                                                        | 12 |
| 5-(Naphthalen-2-yl)-1-(octylsulfonyl)indoline-2,3-dione ( <b>8d</b> ) .....                                                      | 13 |
| 5-Butyl-1-(octylsulfonyl)indoline-2,3-dione ( <b>8e</b> ).....                                                                   | 14 |
| 1-(Butylsulfonyl)-5-phenylindoline-2,3-dione ( <b>9a</b> ).....                                                                  | 15 |
| <i>N</i> -(3-(Dimethylamino)propyl)-2-(4-(octylsulfonamido)-[1,1'-biphenyl]-3-yl)-2-oxoacetamide ( <b>11a</b> ) .....            | 16 |
| <i>N</i> -(3-(Dimethylamino)propyl)-2-(4'-fluoro-4-(octylsulfonamido)-[1,1'-biphenyl]-3-yl)-2-oxoacetamide ( <b>11b</b> ).....   | 17 |
| 2-(4'-Chloro-4-(octylsulfonamido)-[1,1'-biphenyl]-3-yl)- <i>N</i> -(3-(dimethylamino)propyl)-2-oxoacetamide ( <b>11c</b> ) ..... | 18 |
| <i>N</i> -(3-(Dimethylamino)propyl)-2-(5-(naphthalen-2-yl)-2-(octylsulfonamido)phenyl)-2-oxoacetamide ( <b>11d</b> ).....        | 19 |
| 2-(5-Butyl-2-(octylsulfonamido)phenyl)- <i>N</i> -(3-(dimethylamino)propyl)-2-oxoacetamide ( <b>11e</b> ) ...                    | 20 |
| 2-(4-(Butylsulfonamido)-[1,1'-biphenyl]-3-yl)- <i>N</i> -(3-(dimethylamino)propyl)-2-oxoacetamide ( <b>12a</b> ).....            | 21 |

|                                                                                                                                                 |    |
|-------------------------------------------------------------------------------------------------------------------------------------------------|----|
| <i>N,N</i> -Dimethyl-3-(2-(4-(octylsulfonamido)-[1,1'-biphenyl]-3-yl)-2-oxoacetamido)propan-1-aminium chloride ( <b>13a</b> ).....              | 22 |
| 3-(2-(4'-Fluoro-4-(octylsulfonamido)-[1,1'-biphenyl]-3-yl)-2-oxoacetamido)- <i>N,N</i> -dimethylpropan-1-aminium chloride ( <b>13b</b> ) .....  | 23 |
| 3-(2-(4'-Chloro-4-(octylsulfonamido)-[1,1'-biphenyl]-3-yl)-2-oxoacetamido)- <i>N,N</i> -dimethylpropan-1-aminium chloride ( <b>13c</b> ).....   | 24 |
| <i>N,N</i> -Dimethyl-3-(2-(5-(naphthalen-2-yl)-2-(octylsulfonamido)phenyl)-2-oxoacetamido)propan-1-aminium chloride ( <b>13d</b> ) .....        | 25 |
| 3-(2-(5-Butyl-2-(octylsulfonamido)phenyl)-2-oxoacetamido)- <i>N,N</i> -dimethylpropan-1-aminium chloride ( <b>13e</b> ).....                    | 26 |
| 3-(2-(4-(Butylsulfonamido)-[1,1'-biphenyl]-3-yl)-2-oxoacetamido)- <i>N,N</i> -dimethylpropan-1-aminium chloride ( <b>14a</b> ).....             | 27 |
| <i>N,N,N</i> -Trimethyl-3-(2-(4-(octylsulfonamido)-[1,1'-biphenyl]-3-yl)-2-oxoacetamido)propan-1-aminium iodide ( <b>15a</b> ).....             | 28 |
| 3-(2-(4'-Fluoro-4-(octylsulfonamido)-[1,1'-biphenyl]-3-yl)-2-oxoacetamido)- <i>N,N,N</i> -trimethylpropan-1-aminium iodide ( <b>15b</b> ).....  | 29 |
| 3-(2-(4'-Chloro-4-(octylsulfonamido)-[1,1'-biphenyl]-3-yl)-2-oxoacetamido)- <i>N,N,N</i> -trimethylpropan-1-aminium iodide ( <b>15c</b> ) ..... | 30 |
| <i>N,N,N</i> -Trimethyl-3-(2-(5-(naphthalen-2-yl)-2-(octylsulfonamido)phenyl)-2-oxoacetamido)propan-1-aminium iodide ( <b>15d</b> ).....        | 31 |
| 3-(2-(5-Butyl-2-(octylsulfonamido)phenyl)-2-oxoacetamido)- <i>N,N,N</i> -trimethylpropan-1-aminium iodide ( <b>15e</b> ) .....                  | 32 |
| 3-(2-(4-(Butylsulfonamido)-[1,1'-biphenyl]-3-yl)-2-oxoacetamido)- <i>N,N,N</i> -trimethylpropan-1-aminium iodide ( <b>16a</b> ).....            | 33 |
| <i>tert</i> -Butyl (3-(2-(4-(octylsulfonamido)-[1,1'-biphenyl]-3-yl)-2-oxoacetamido)propyl)carbamate ( <b>18a</b> ).....                        | 34 |
| <i>tert</i> -Butyl (3-(2-(4'-fluoro-4-(octylsulfonamido)-[1,1'-biphenyl]-3-yl)-2-oxoacetamido)propyl)carbamate ( <b>18b</b> ) .....             | 35 |
| <i>tert</i> -Butyl (3-(2-(4'-Chloro-4-(octylsulfonamido)-[1,1'-biphenyl]-3-yl)-2-oxoacetamido)propyl)carbamate ( <b>18c</b> ).....              | 36 |
| <i>tert</i> -Butyl (3-(2-(5-(naphthalen-2-yl)-2-(octylsulfonamido)phenyl)-2-oxoacetamido)propyl)carbamate ( <b>18d</b> ) .....                  | 37 |
| <i>N</i> -(3-Aminopropyl)-2-(4-(octylsulfonamido)-[1,1'-biphenyl]-3-yl)-2-oxoacetamide hydrochloride ( <b>19a</b> ).....                        | 38 |
| <i>N</i> -(3-Aminopropyl)-2-(4'-fluoro-4-(octylsulfonamido)-[1,1'-biphenyl]-3-yl)-2-oxoacetamide hydrochloride ( <b>19b</b> ) .....             | 39 |
| <i>N</i> -(3-Aminopropyl)-2-(4'-chloro-4-(octylsulfonamido)-[1,1'-biphenyl]-3-yl)-2-oxoacetamide hydrochloride ( <b>19c</b> ).....              | 40 |
| <i>N</i> -(3-Aminopropyl)-2-(5-(naphthalen-2-yl)-2-(octylsulfonamido)phenyl)-2-oxoacetamide hydrochloride ( <b>19d</b> ) .....                  | 41 |

|                                                                                                                                                                                                                                                         |    |
|---------------------------------------------------------------------------------------------------------------------------------------------------------------------------------------------------------------------------------------------------------|----|
| ( <i>E</i> )-1- <i>tert</i> -Butyl- <i>N</i> -( <i>N'</i> -(( <i>tert</i> -butyloxidanyl)carbonyl)- <i>N</i> -(3-(2-(4-(octylsulfonamido)-[1,1'-biphenyl]-3-yl)-2-oxoacetamido)propyl)carbamimidoyl)-1-oxidanecarboxamide ( <b>21a</b> ).....           | 42 |
| ( <i>E</i> )-1- <i>tert</i> -Butyl- <i>N</i> -( <i>N'</i> -(( <i>tert</i> -butyloxidanyl)carbonyl)- <i>N</i> -(3-(2-(4'-fluoro-4-(octylsulfonamido)-[1,1'-biphenyl]-3-yl)-2-oxoacetamido)propyl)carbamimidoyl)-1-oxidanecarboxamide ( <b>21b</b> )..... | 43 |
| ( <i>E</i> )-1- <i>tert</i> -Butyl- <i>N</i> -( <i>N'</i> -(( <i>tert</i> -butyloxidanyl)carbonyl)- <i>N</i> -(3-(2-(4'-chloro-4-(octylsulfonamido)-[1,1'-biphenyl]-3-yl)-2-oxoacetamido)propyl)carbamimidoyl)-1-oxidanecarboxamide ( <b>21c</b> )..... | 44 |
| ( <i>E</i> )-1- <i>tert</i> -Butyl- <i>N</i> -( <i>N'</i> -(( <i>tert</i> -butyloxidanyl)carbonyl)- <i>N</i> -(3-(2-(5-(naphthalen-2-yl)-2-(octylsulfonamido)phenyl)-2-oxoacetamido)propyl)carbamimidoyl)-1-oxidanecarboxamide ( <b>21d</b> ).....      | 45 |
| <i>N</i> -(3-Guanidinopropyl)-2-(4-(octylsulfonamido)-[1,1'-biphenyl]-3-yl)-2-oxoacetamide hydrochloride ( <b>22a</b> ) .....                                                                                                                           | 46 |
| 2-(4'-Fluoro-4-(octylsulfonamido)-[1,1'-biphenyl]-3-yl)- <i>N</i> -(3-guanidinopropyl)-2-oxoacetamide hydrochloride ( <b>22b</b> ) .....                                                                                                                | 47 |
| 2-(4'-Chloro-4-(octylsulfonamido)-[1,1'-biphenyl]-3-yl)- <i>N</i> -(3-guanidinopropyl)-2-oxoacetamide hydrochloride ( <b>22c</b> ).....                                                                                                                 | 48 |
| <i>N</i> -(3-Guanidinopropyl)-2-(5-(naphthalen-2-yl)-2-(octylsulfonamido)phenyl)-2-oxoacetamide hydrochloride ( <b>22d</b> ) .....                                                                                                                      | 49 |
| 1-(2-Naphthoyl)-5-phenylindoline-2,3-dione ( <b>24</b> ) .....                                                                                                                                                                                          | 50 |
| <i>N</i> -(3-(2-((3-(Dimethylamino)propyl)amino)-2-oxoacetyl)-[1,1'-biphenyl]-4-yl)-2-naphthamide ( <b>25</b> ).....                                                                                                                                    | 51 |
| 3-(2-(4-(2-Naphthamido)-[1,1'-biphenyl]-3-yl)-2-oxoacetamido)- <i>N,N</i> -dimethylpropan-1-aminium chloride ( <b>26</b> ).....                                                                                                                         | 52 |
| 3-(2-(4-(2-Naphthamido)-[1,1'-biphenyl]-3-yl)-2-oxoacetamido)- <i>N,N,N</i> -trimethylpropan-1-aminium iodide ( <b>27</b> ).....                                                                                                                        | 53 |

## Supplementary figures for the antibiofilm activity of compounds 15c-15d, 22a-22d

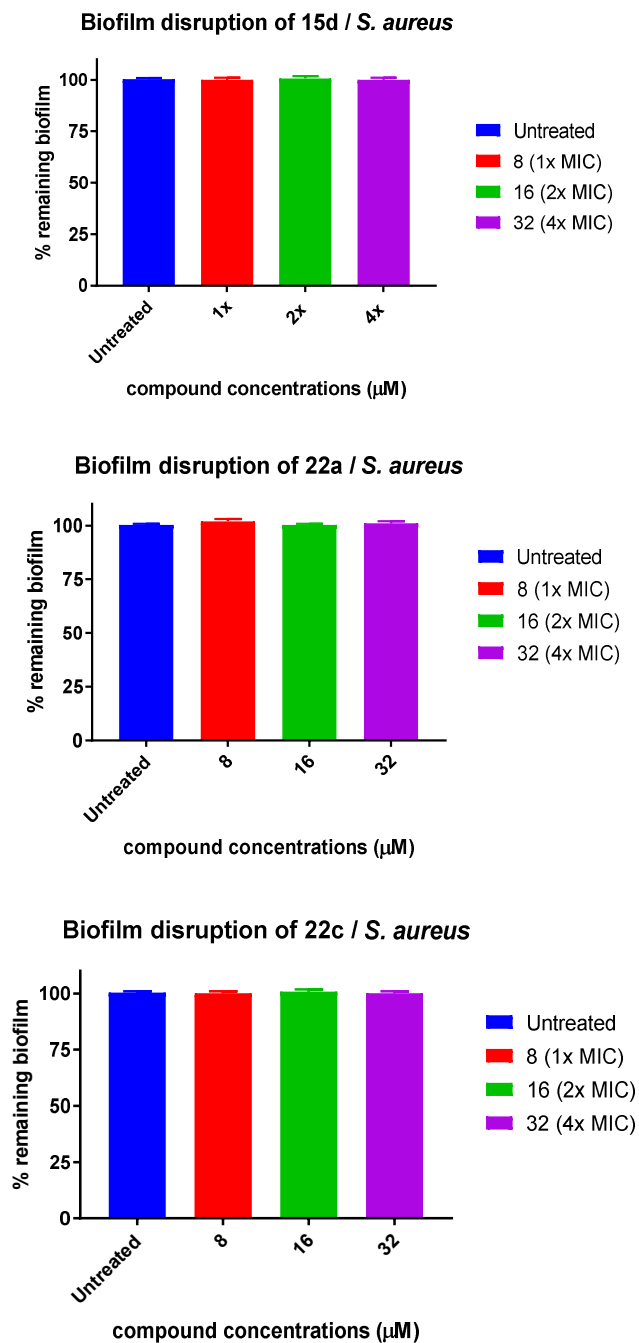

**Figure S1.** Percentage of remaining *S. aureus* biofilms after 24 h treatment with compounds **15d** (top), **22a** (middle) or **22c** (bottom) at 1x, 2x and 4x of their MIC. Error bars represent the standard error of triplicates (n = 3).

### Biofilm disruption of 15c and 22b / *E. coli*

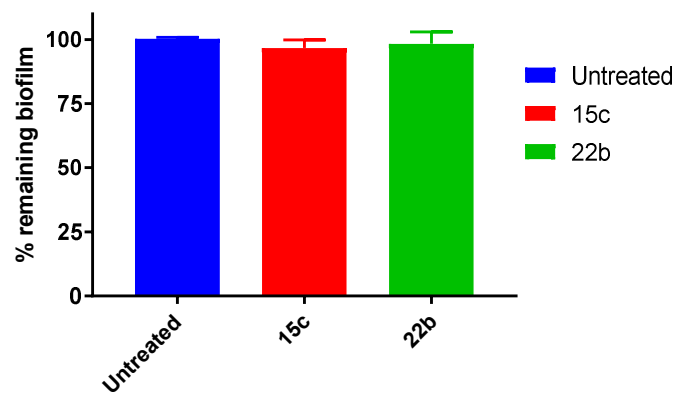

**Figure S2.** Percentage of remaining *E. coli* biofilms after 24 h treatment with compounds **15c** or **22c** at 4× of their MIC (64  $\mu$ M). Error bars represent the standard error of triplicates (n = 3).

# $^1\text{H}$ NMR and $^{13}\text{C}$ NMR spectra of synthesized compounds

5-Phenylindoline-2,3-dione (**7a**)

$^1\text{H}$  NMR (400 MHz,  $\text{DMSO-}d_6$ ):

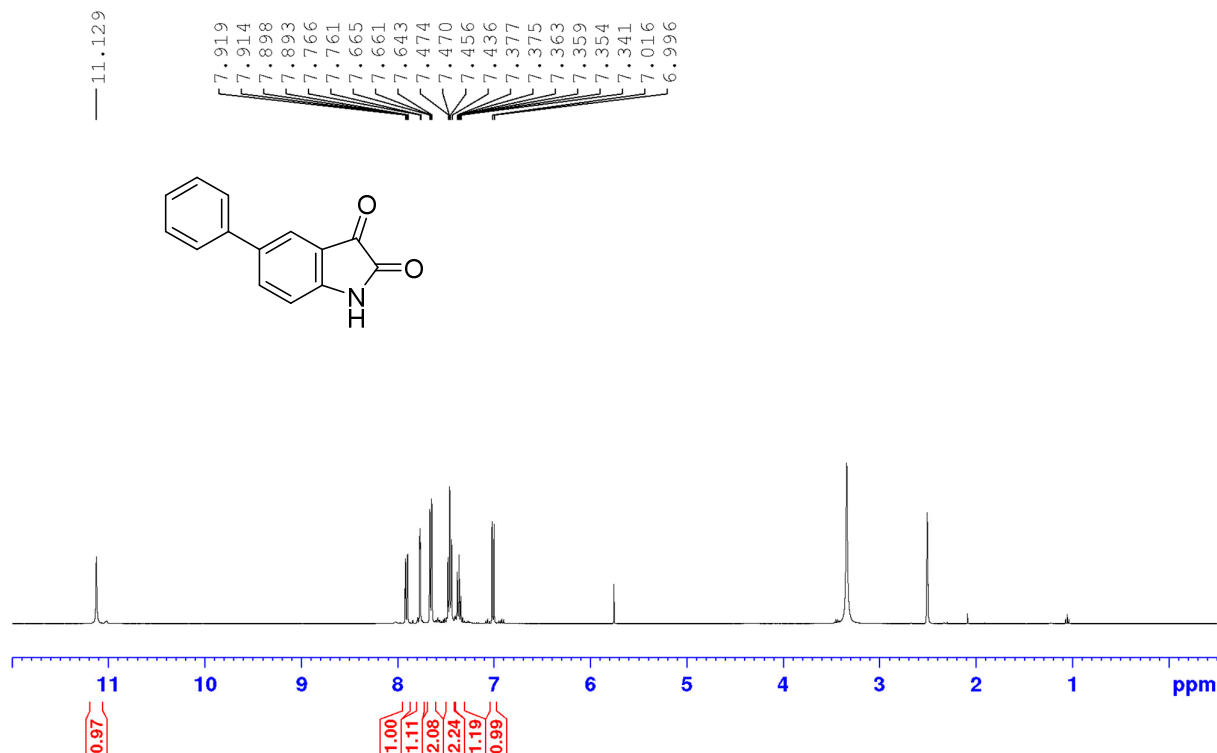

$^{13}\text{C}$  NMR (100 MHz,  $\text{DMSO-}d_6$ ):

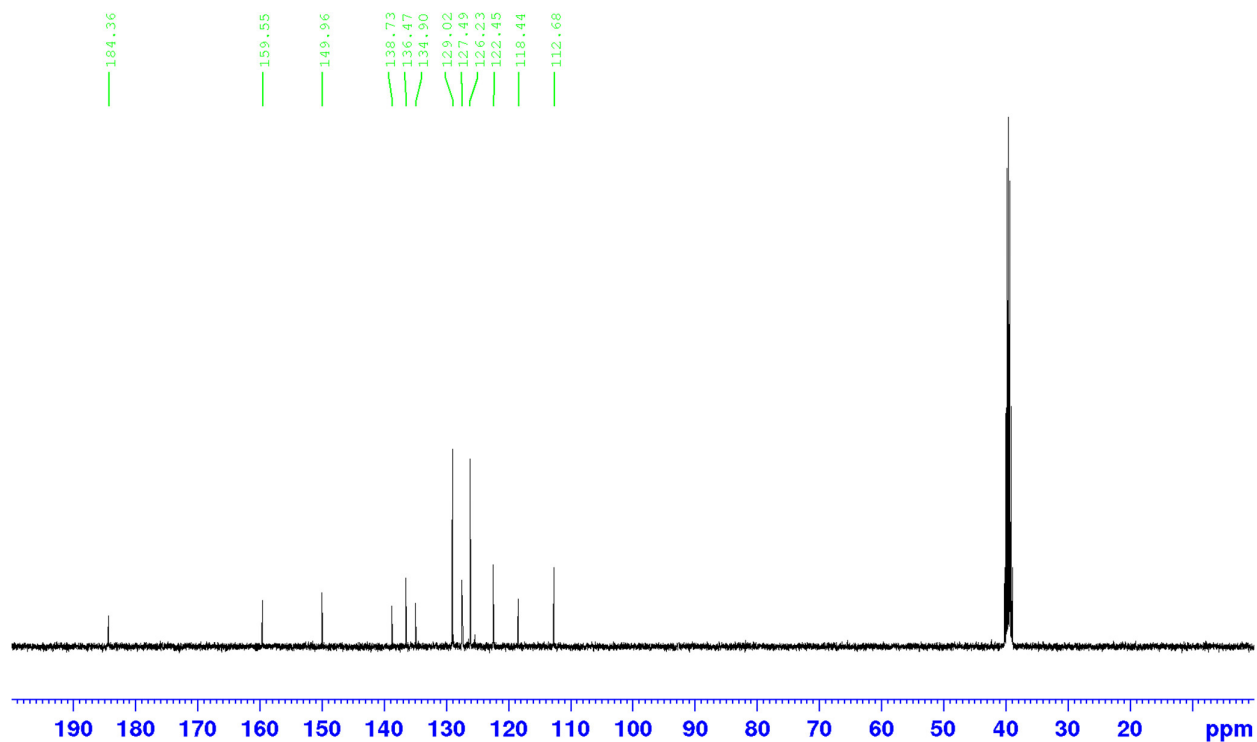

5-(4-Fluorophenyl)indoline-2,3-dione (**7b**)

$^1\text{H}$  NMR (400 MHz,  $\text{DMSO-}d_6$ ):

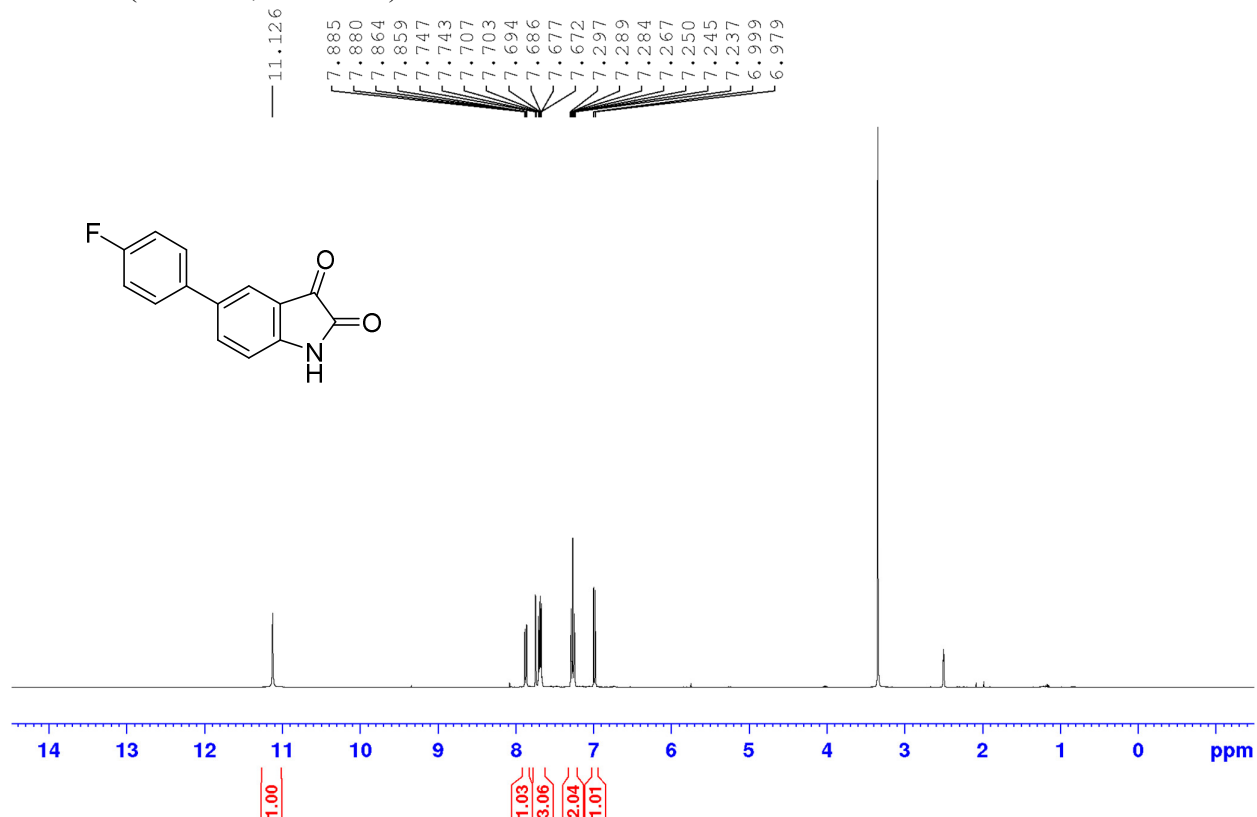

$^{13}\text{C}$  NMR (100 MHz,  $\text{DMSO-}d_6$ ):

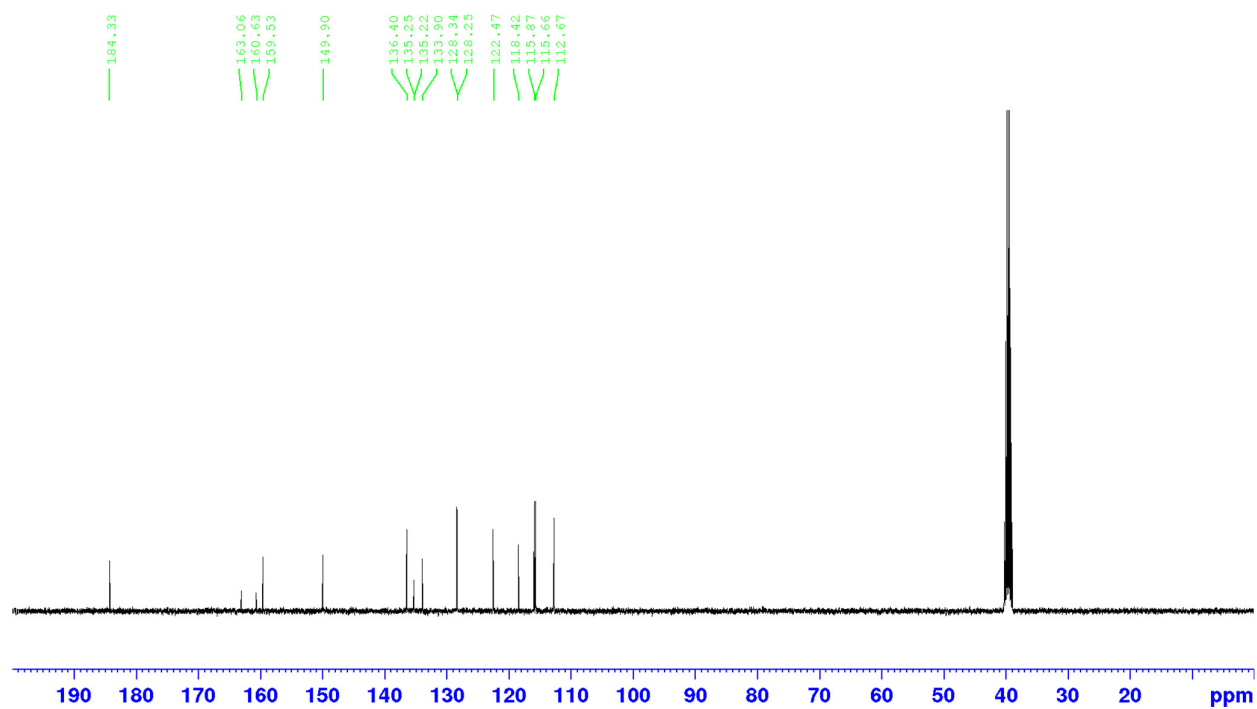

5-(4-Chlorophenyl)indoline-2,3-dione (**7c**)

$^1\text{H}$  NMR (400 MHz,  $\text{DMSO-}d_6$ ):

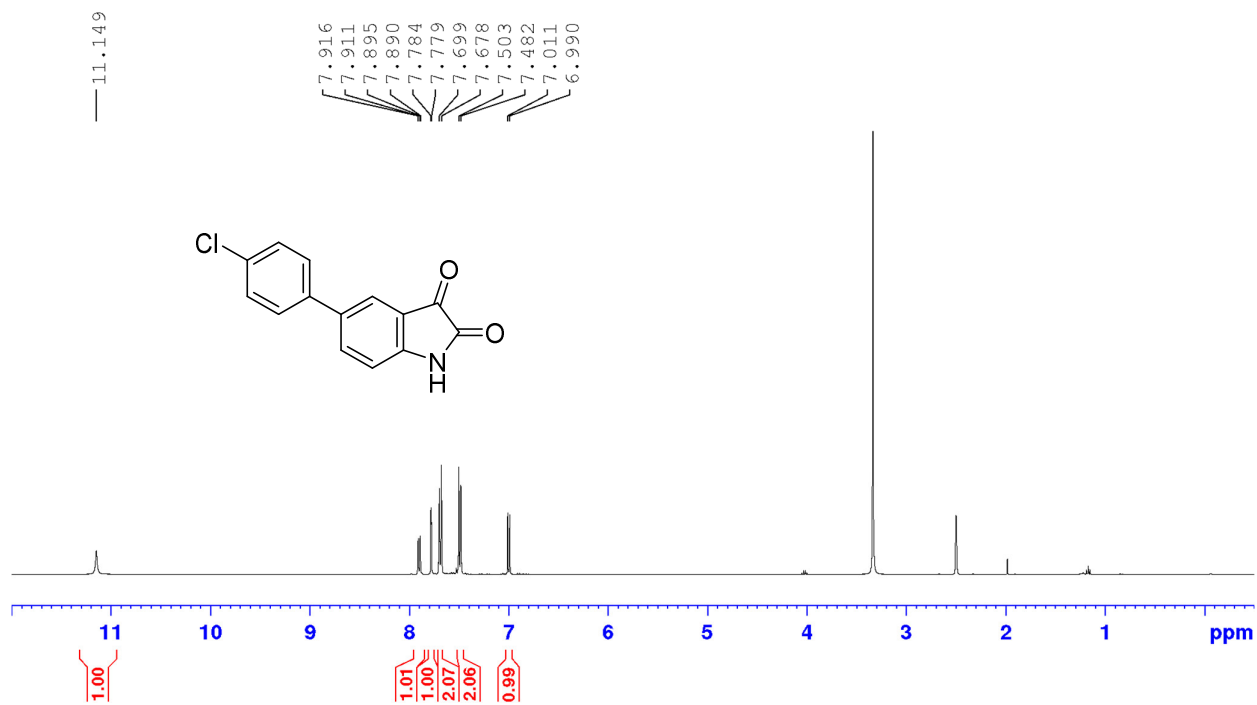

$^{13}\text{C}$  NMR (100 MHz,  $\text{DMSO-}d_6$ ):

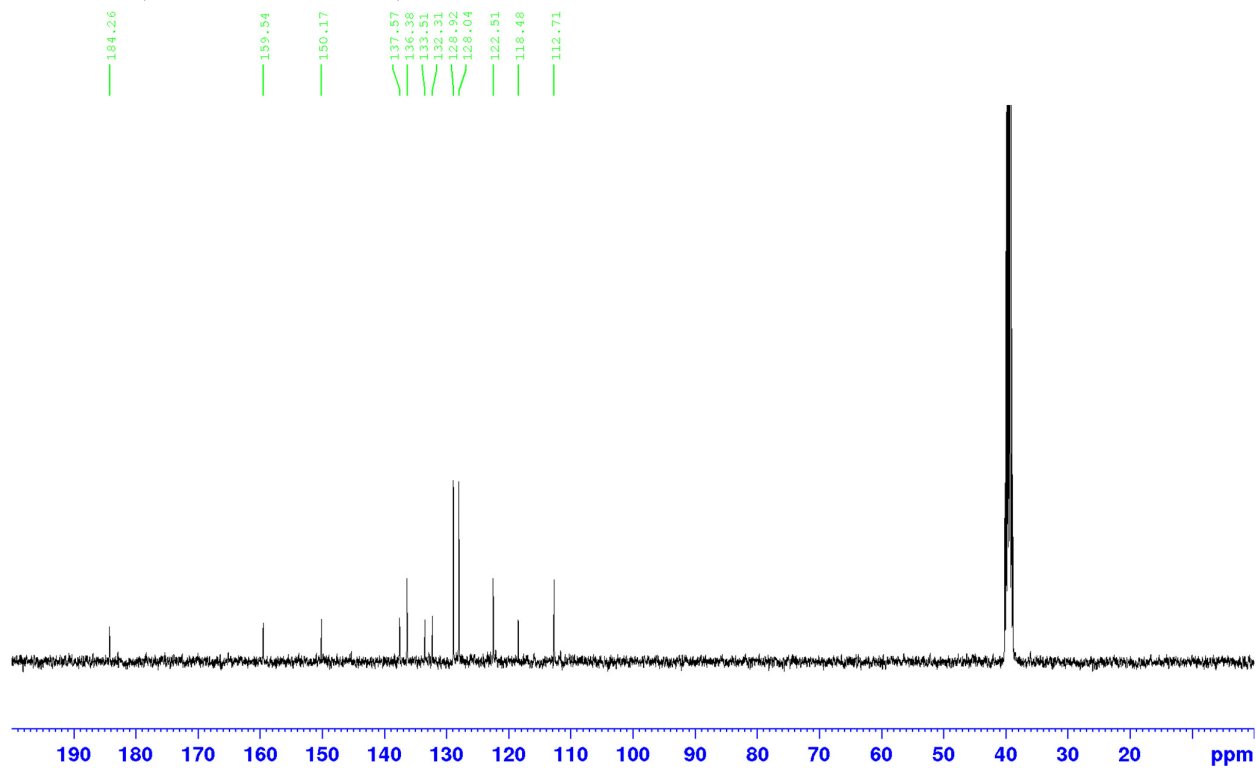



5-(Naphthalen-2-yl)indoline-2,3-dione (**7d**)

$^1\text{H}$  NMR (600 MHz,  $\text{DMSO-}d_6$ ):

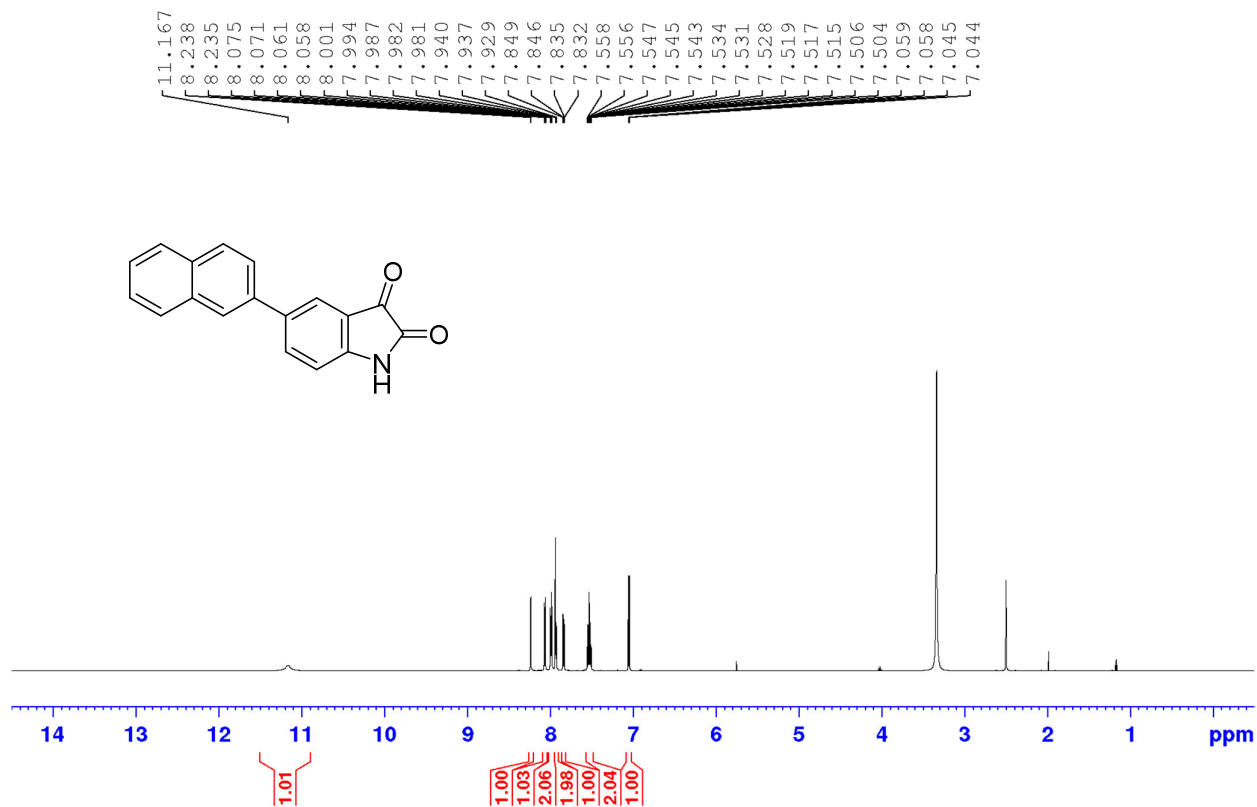

$^{13}\text{C}$  NMR (150 MHz,  $\text{DMSO-}d_6$ ):

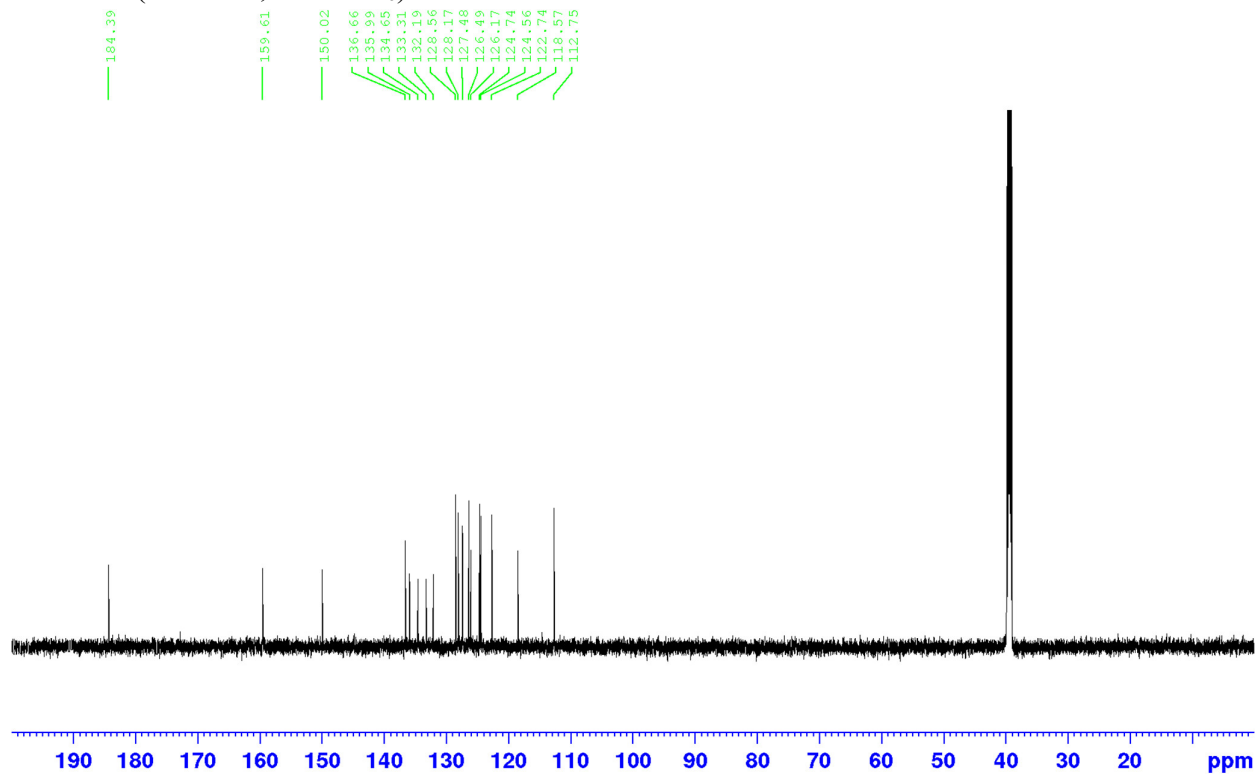

1-(Octylsulfonyl)-5-phenylindoline-2,3-dione (**8a**)

$^1\text{H}$  NMR (400 MHz,  $\text{DMSO-}d_6$ ):

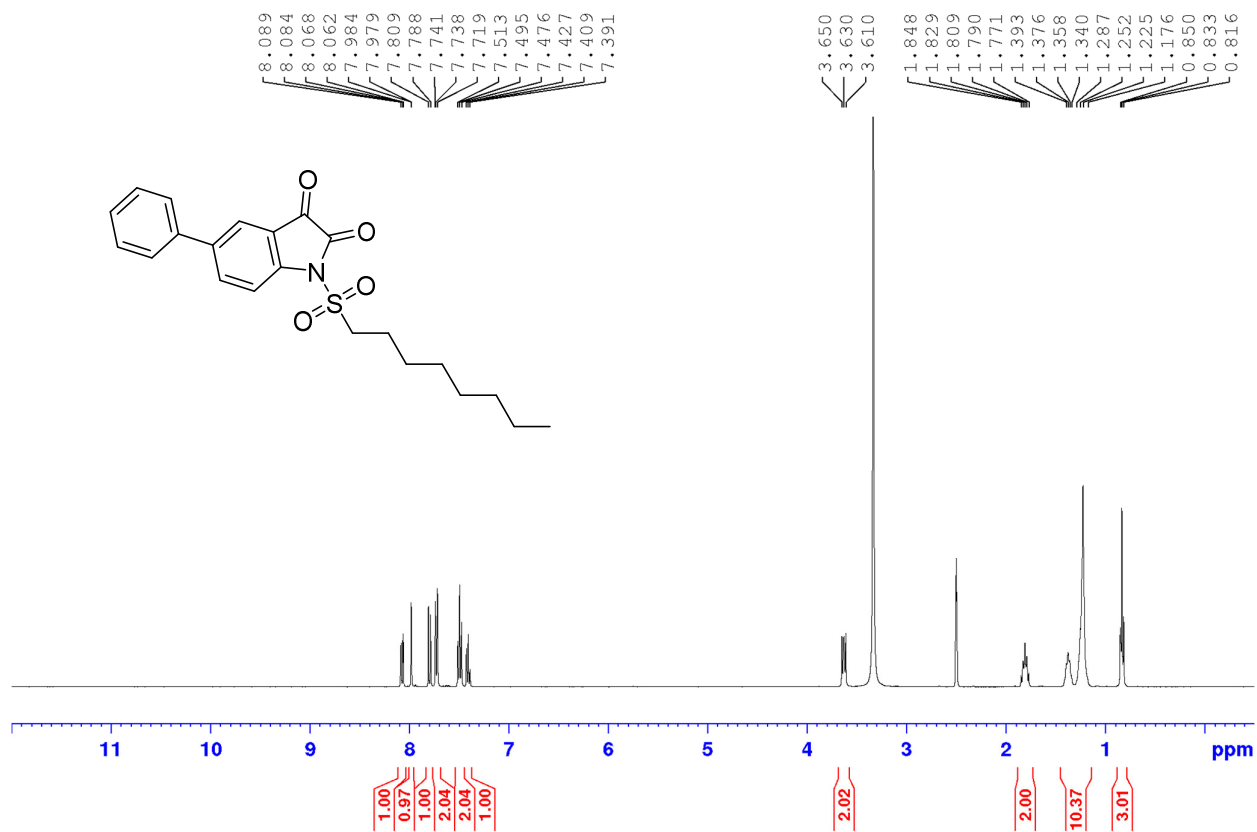

$^{13}\text{C}$  NMR (100 MHz,  $\text{DMSO-}d_6$ ):

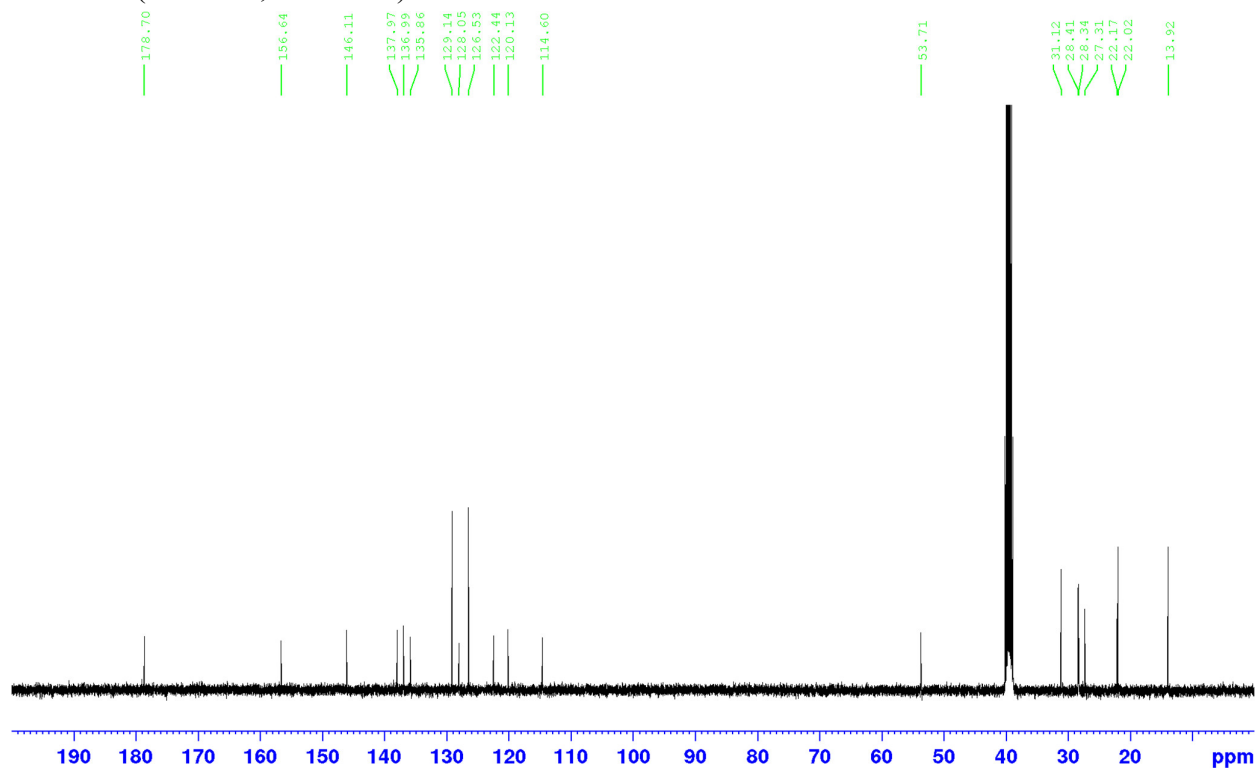

# 5-(4-Fluorophenyl)-1-(octylsulfonyl)indoline-2,3-dione (**8b**)

<sup>1</sup>H NMR (400 MHz, DMSO-*d*<sub>6</sub>):

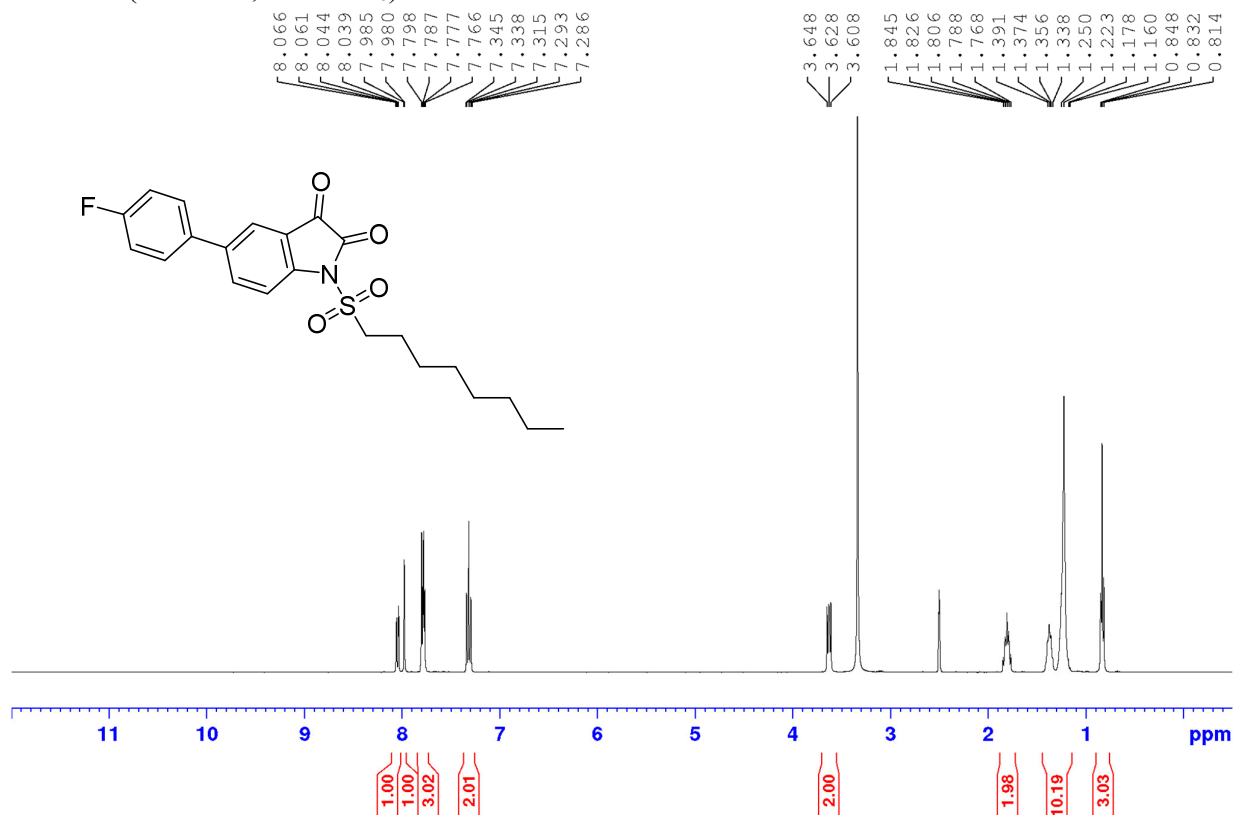

<sup>13</sup>C NMR (100 MHz, DMSO-*d*<sub>6</sub>):

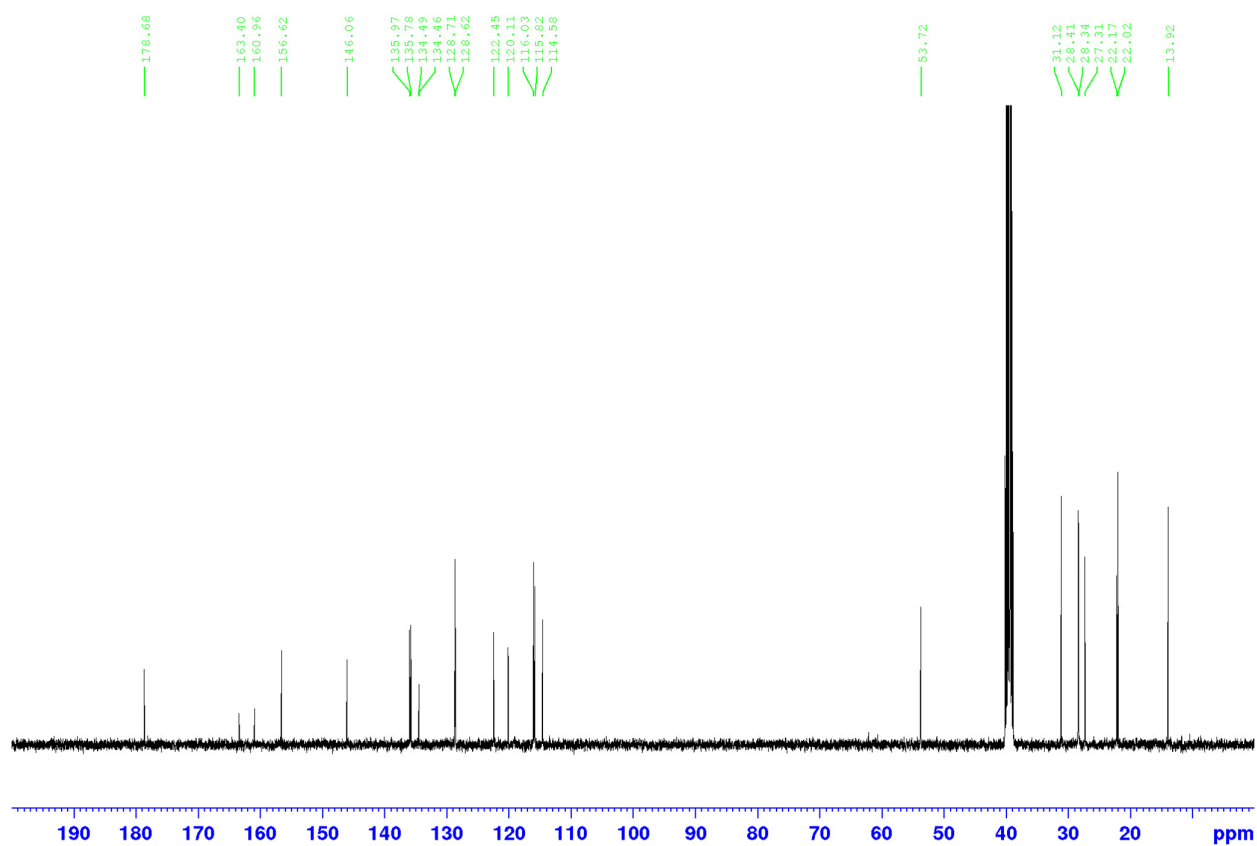

5-(4-Chlorophenyl)-1-(octylsulfonyl)indoline-2,3-dione (**8c**)

$^1\text{H}$  NMR (400 MHz,  $\text{DMSO}-d_6$ ):

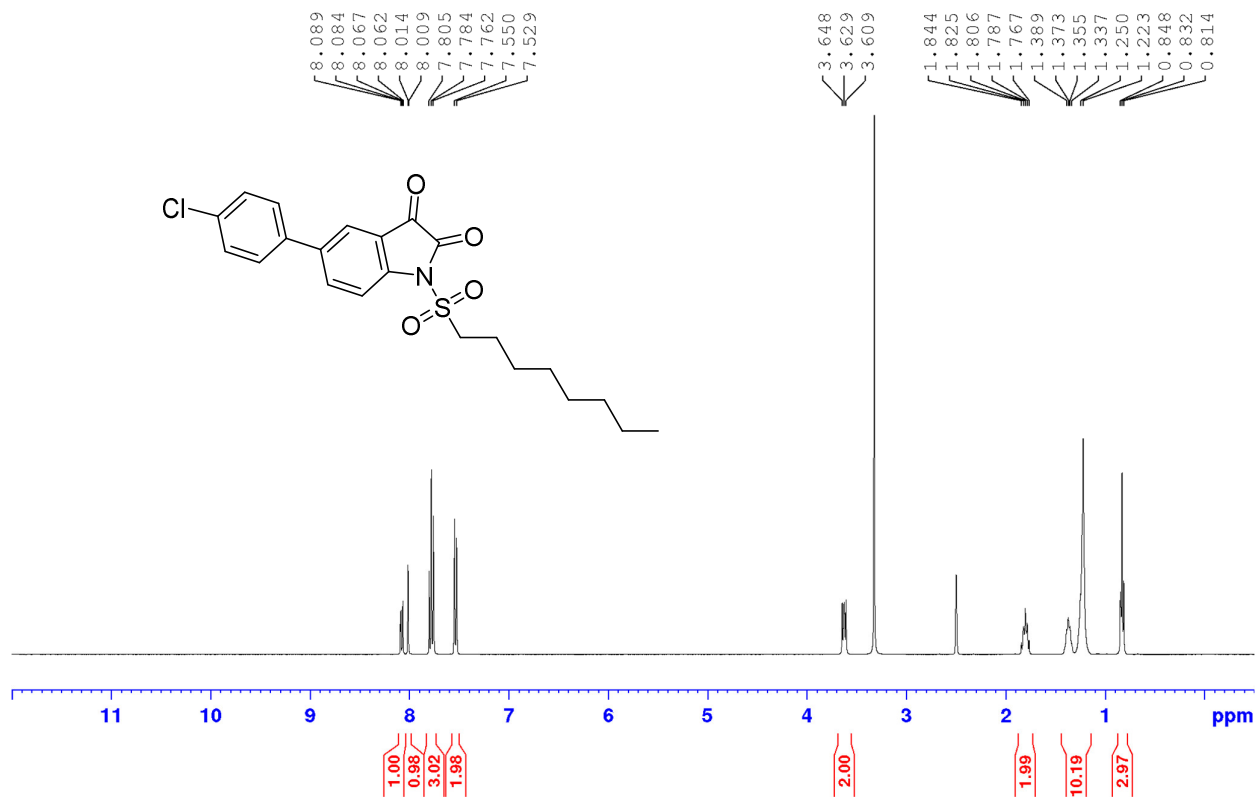

$^{13}\text{C}$  NMR (100 MHz,  $\text{DMSO}-d_6$ ):

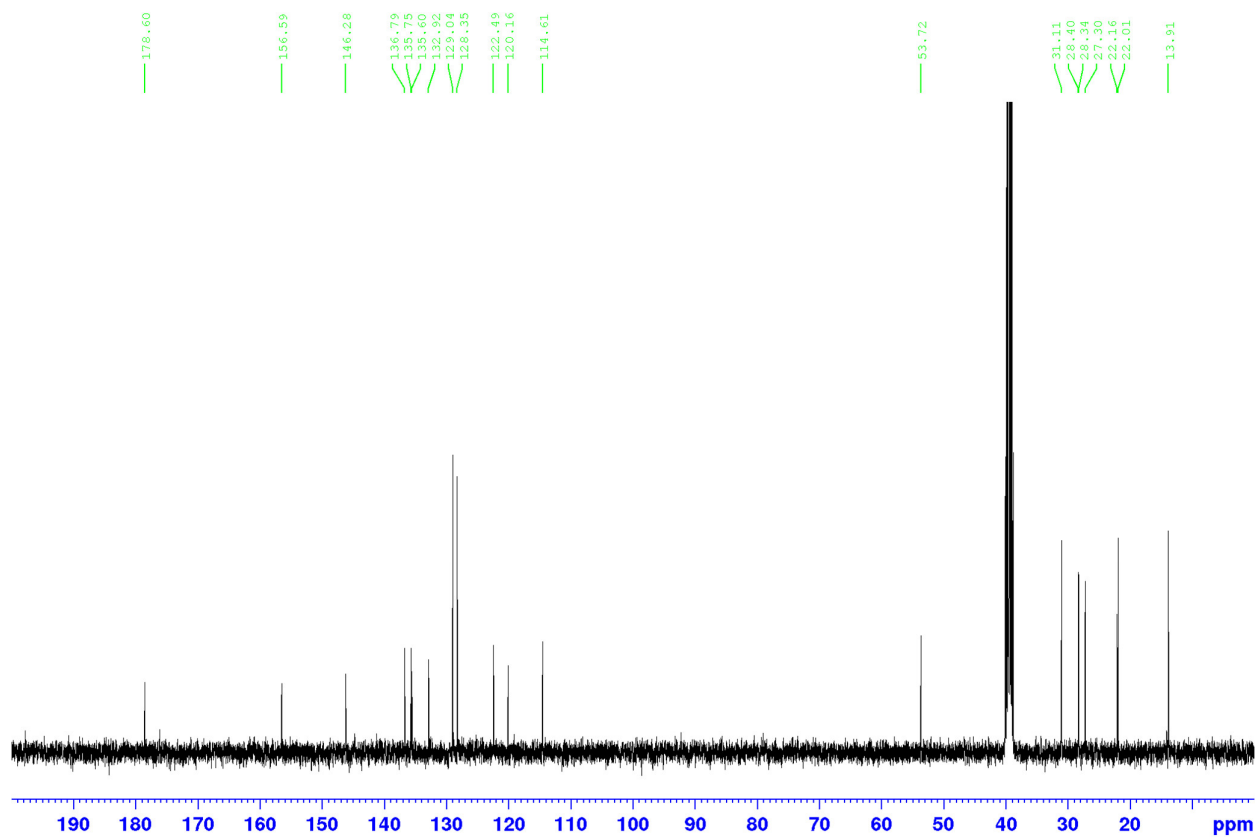

5-(Naphthalen-2-yl)-1-(octylsulfonyl)indoline-2,3-dione (**8d**)

$^1\text{H}$  NMR (400 MHz,  $\text{DMSO-}d_6$ ):

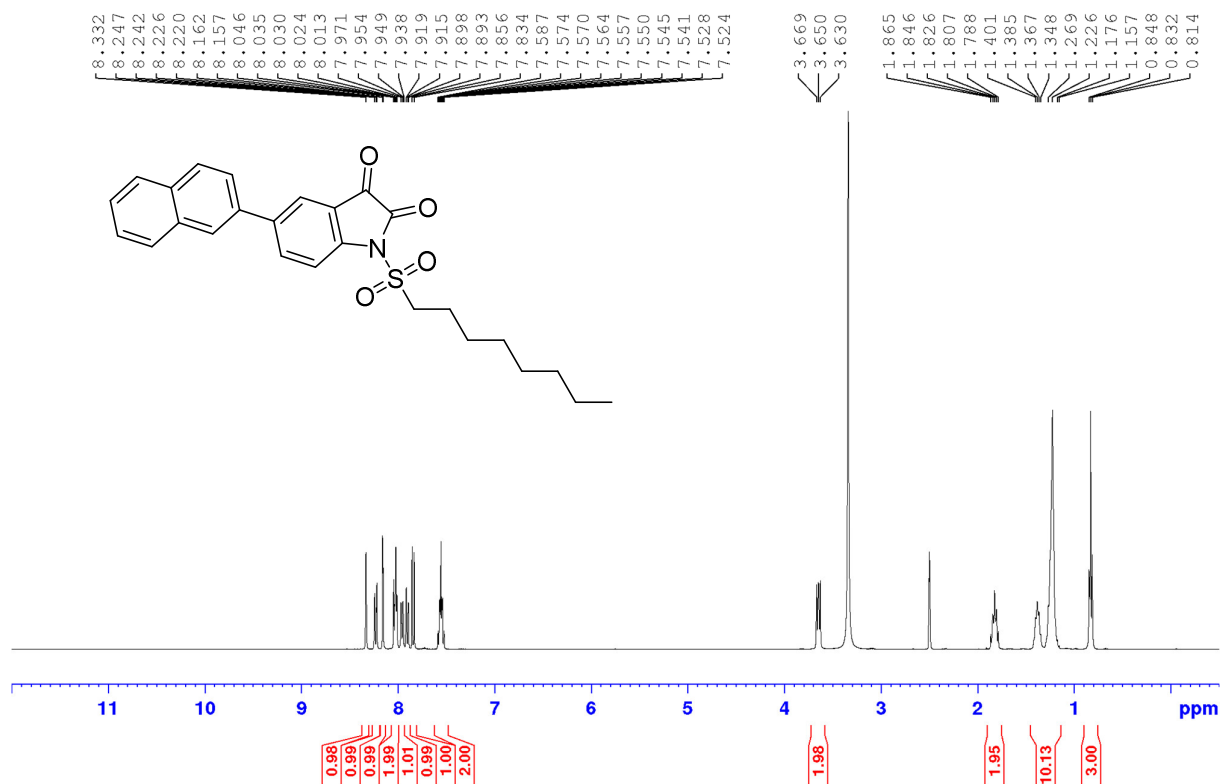

$^{13}\text{C}$  NMR (100 MHz,  $\text{DMSO-}d_6$ ):

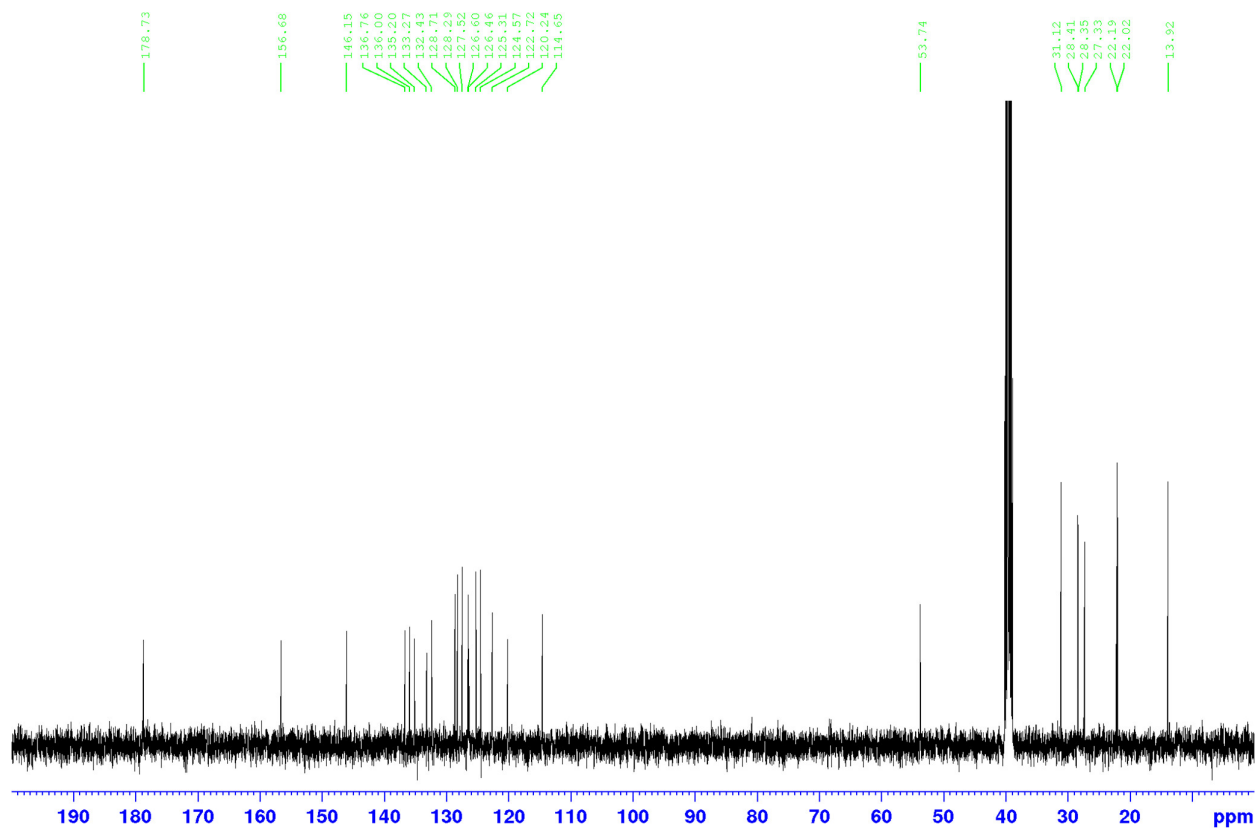

5-Butyl-1-(octylsulfonyl)indoline-2,3-dione (**8e**)

$^1\text{H}$  NMR (400 MHz,  $\text{DMSO-}d_6$ ):

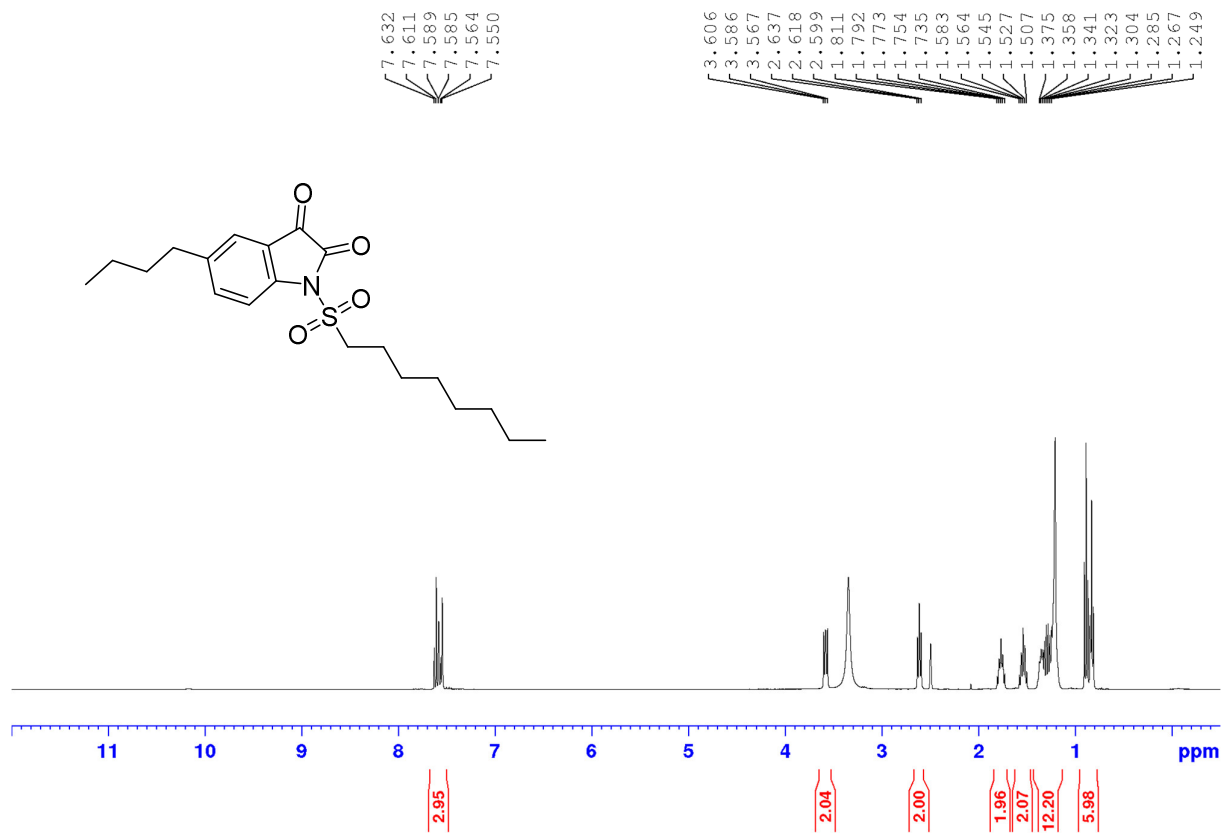

$^{13}\text{C}$  NMR (100 MHz,  $\text{DMSO-}d_6$ ):

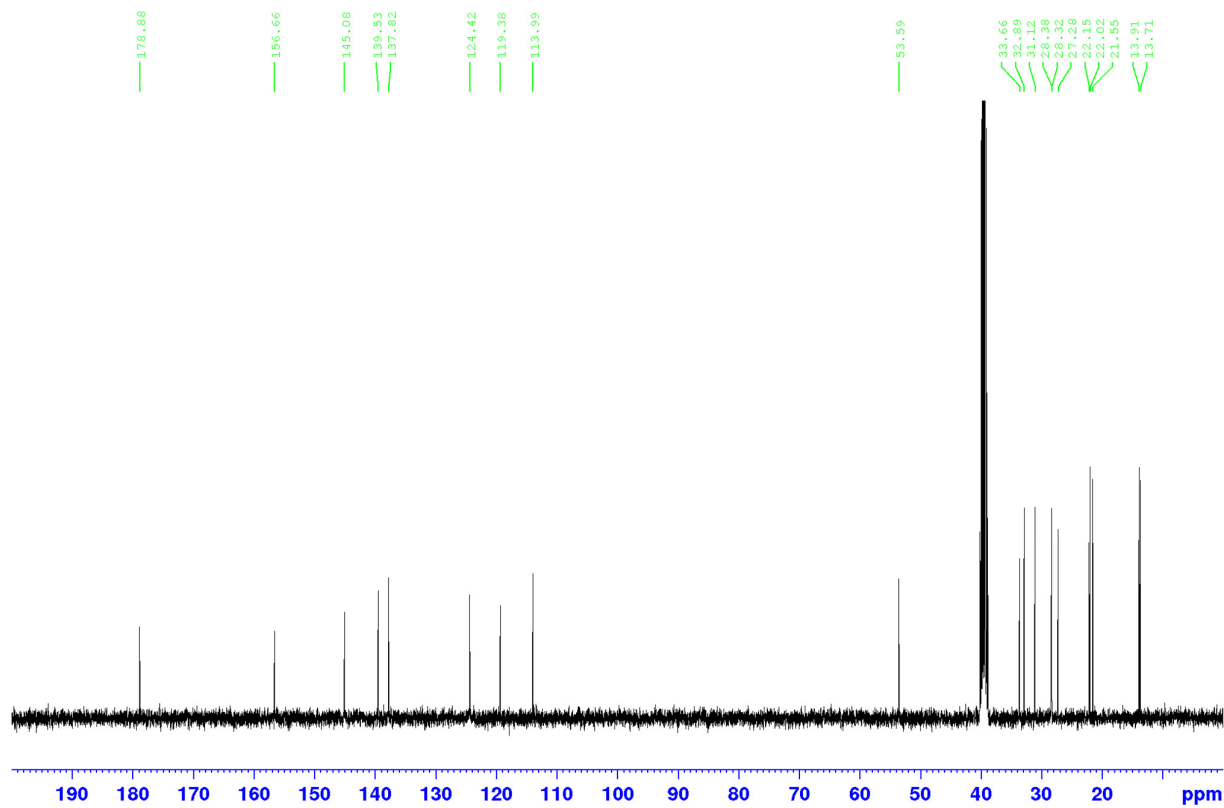

# 1-(Butylsulfonyl)-5-phenylindoline-2,3-dione (**9a**)

$^1\text{H}$  NMR (400 MHz,  $\text{DMSO-}d_6$ ):

8.090  
8.085  
8.068  
8.063  
7.985  
7.980  
7.814  
7.792  
7.743  
7.739  
7.721  
7.514  
7.496  
7.476  
7.428  
7.409  
7.404  
7.391

3.659  
3.639  
3.619  
1.842  
1.823  
1.810  
1.803  
1.795  
1.785  
1.780  
1.765  
1.456  
1.437  
1.418  
1.400  
1.381  
1.363  
0.896  
0.877  
0.859

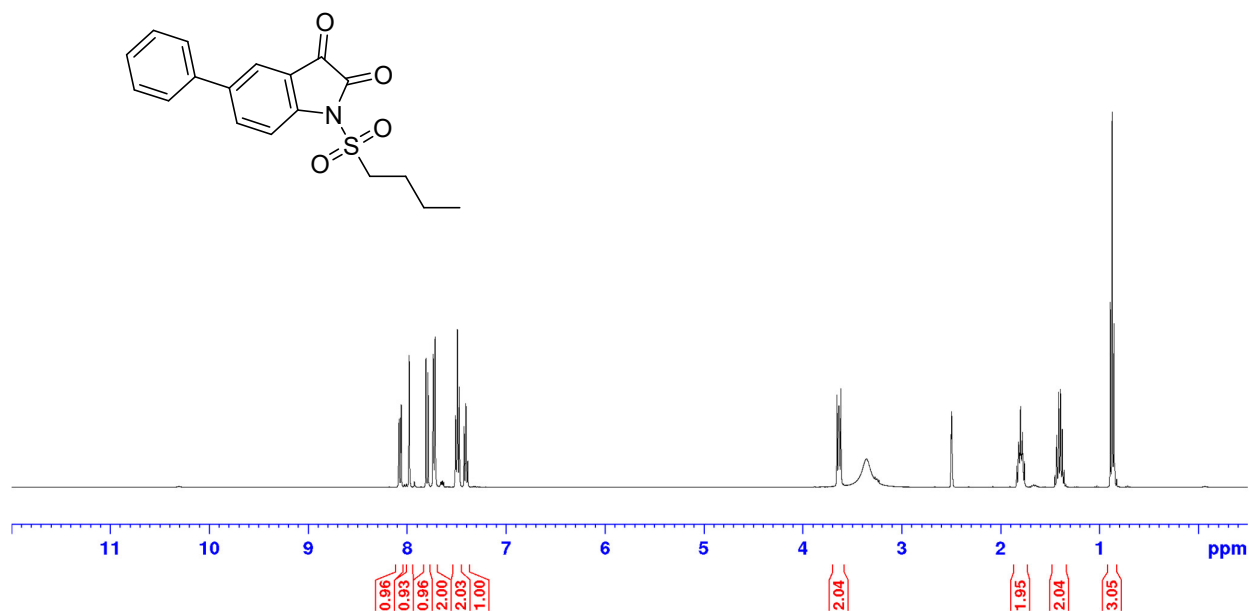

$^{13}\text{C}$  NMR (100 MHz,  $\text{DMSO-}d_6$ ):

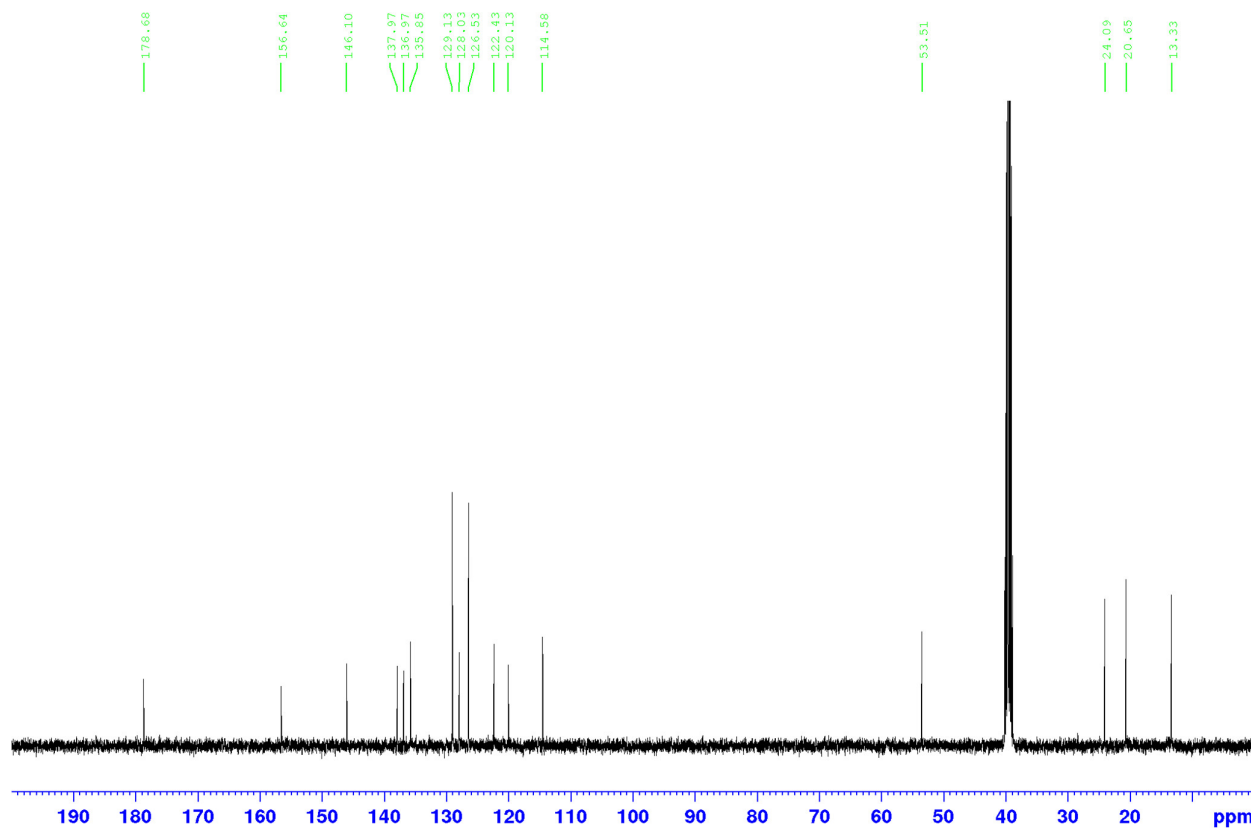

*N*-(3-(Dimethylamino)propyl)-2-(4-(octylsulfonamido)-[1,1'-biphenyl]-3-yl)-2-oxoacetamide (**11a**)

<sup>1</sup>H NMR (400 MHz, CDCl<sub>3</sub>):

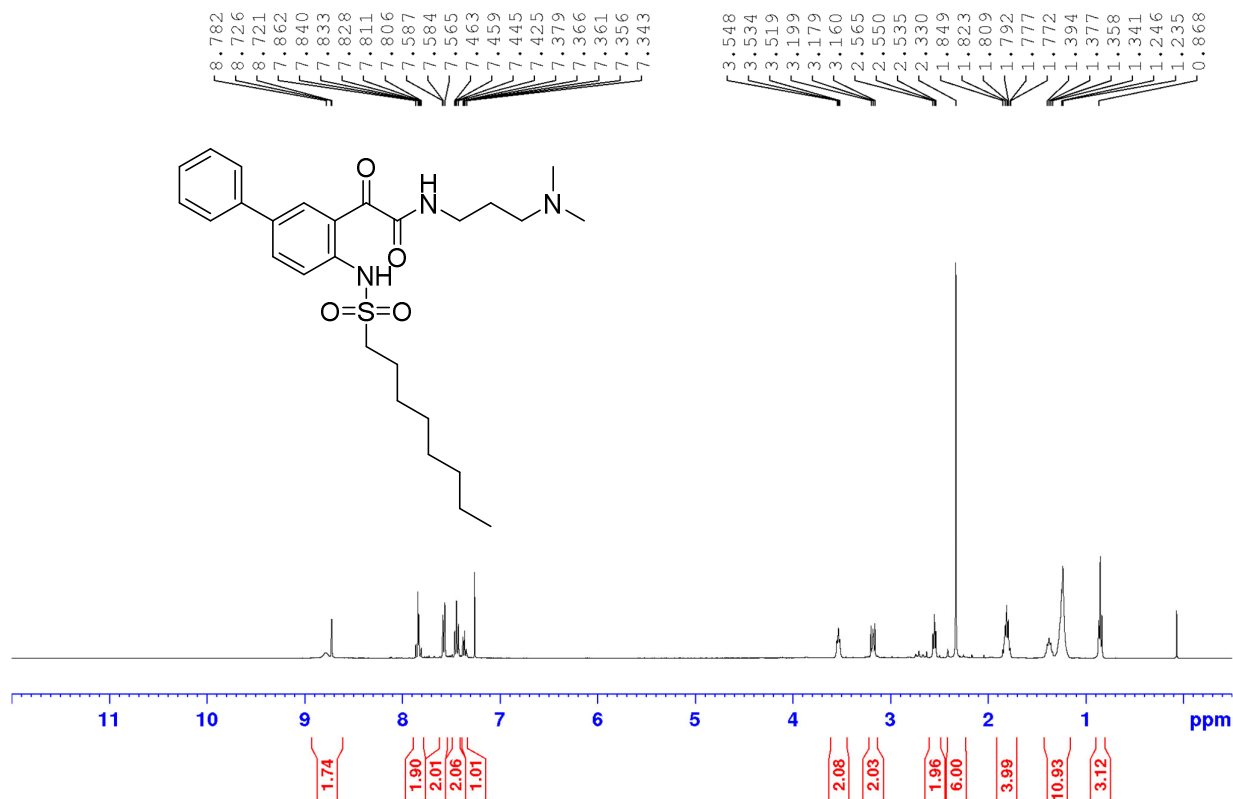

<sup>13</sup>C NMR (100 MHz, CDCl<sub>3</sub>):

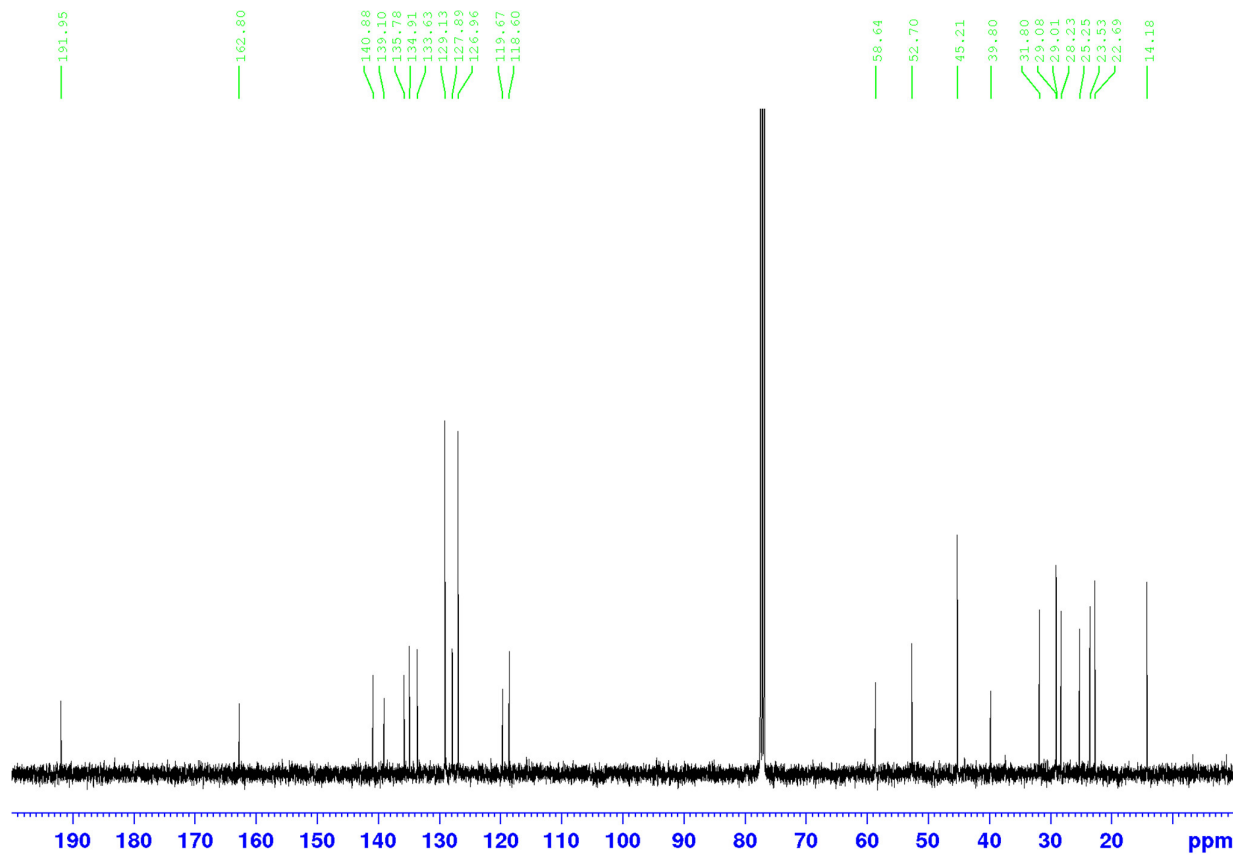



*N*-(3-(Dimethylamino)propyl)-2-(4'-fluoro-4-(octylsulfonamido)-[1,1'-biphenyl]-3-yl)-2-oxoacetamide (**11b**)

$^1\text{H}$  NMR (400 MHz,  $\text{CDCl}_3$ ):

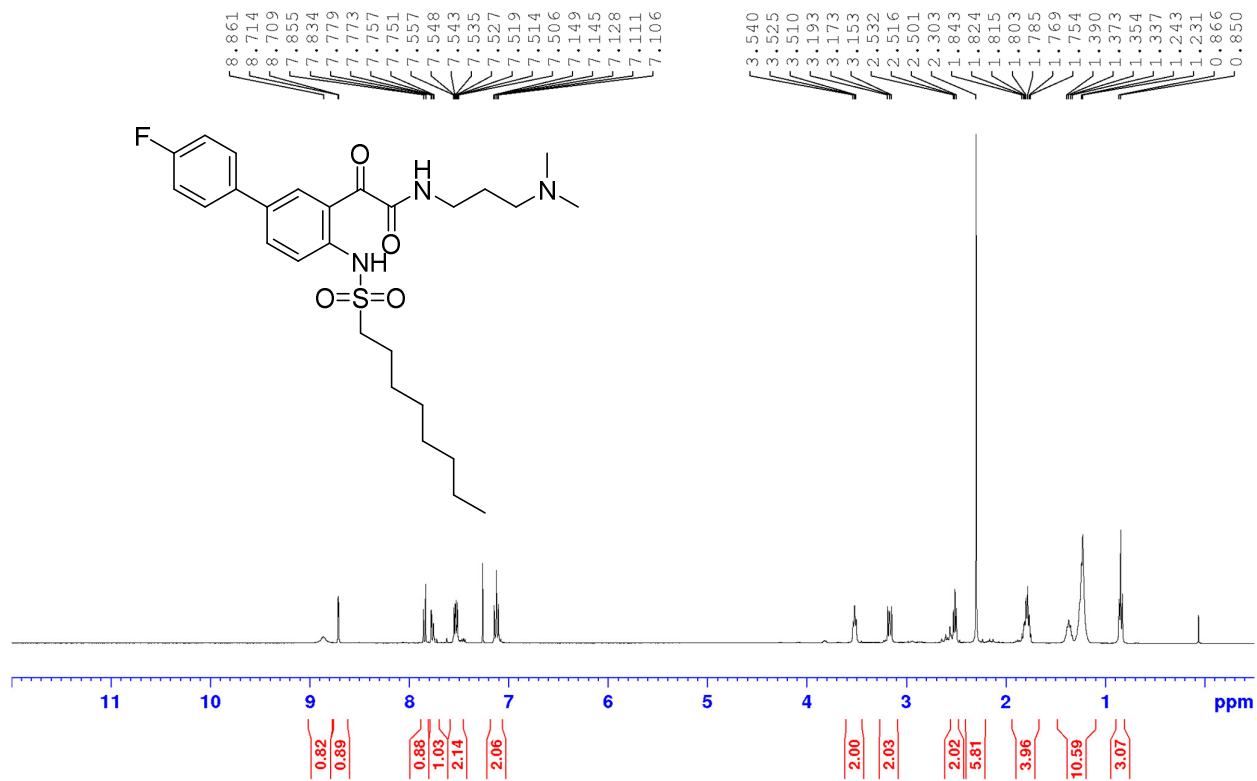

$^{13}\text{C}$  NMR (100 MHz,  $\text{CDCl}_3$ ):

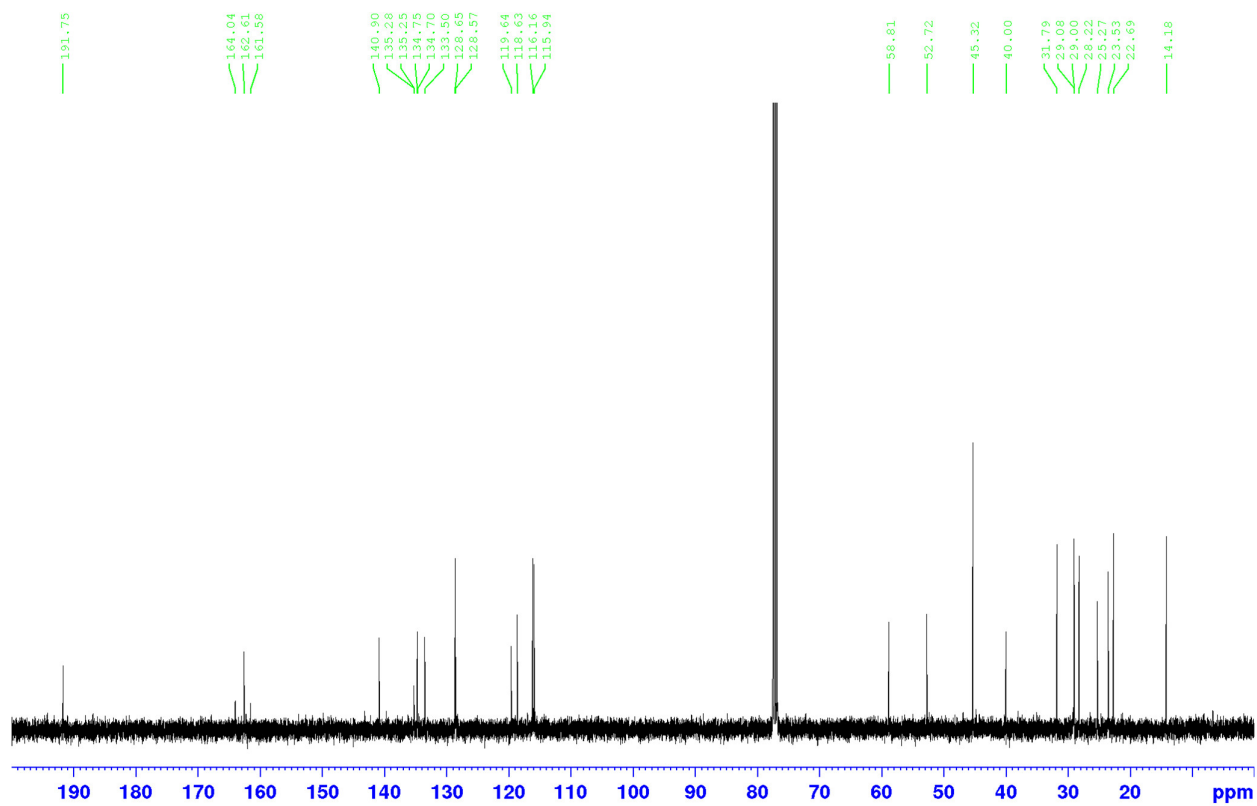

2-(4'-Chloro-4-(octylsulfonamido)-[1,1'-biphenyl]-3-yl)-N-(3-(dimethylamino)propyl)-2-oxoacetamide (11c)

$^1\text{H}$  NMR (400 MHz,  $\text{CDCl}_3$ ):

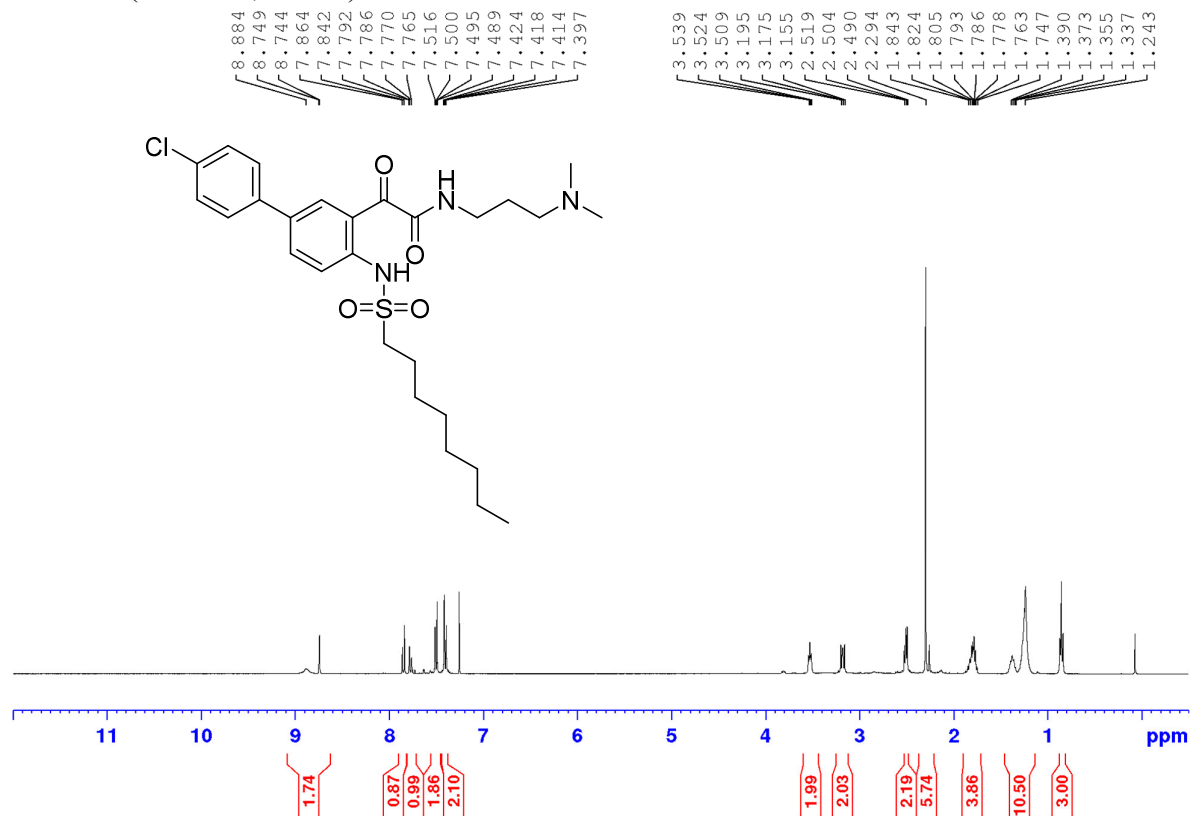

$^{13}\text{C}$  NMR (100 MHz,  $\text{CDCl}_3$ ):

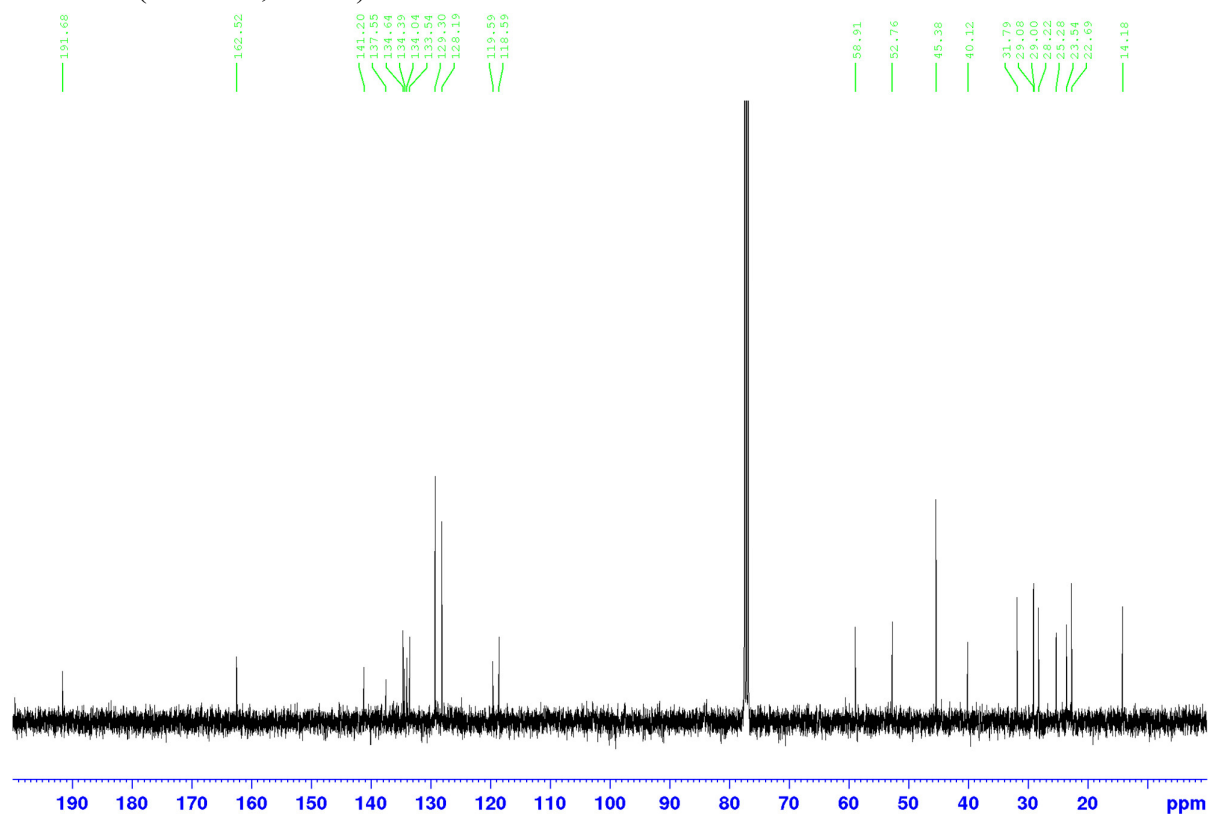

*N*-(3-(Dimethylamino)propyl)-2-(5-(naphthalen-2-yl)-2-(octylsulfonamido)phenyl)-2-oxoacetamide  
**(11d)**

<sup>1</sup>H NMR (400 MHz, CDCl<sub>3</sub>):

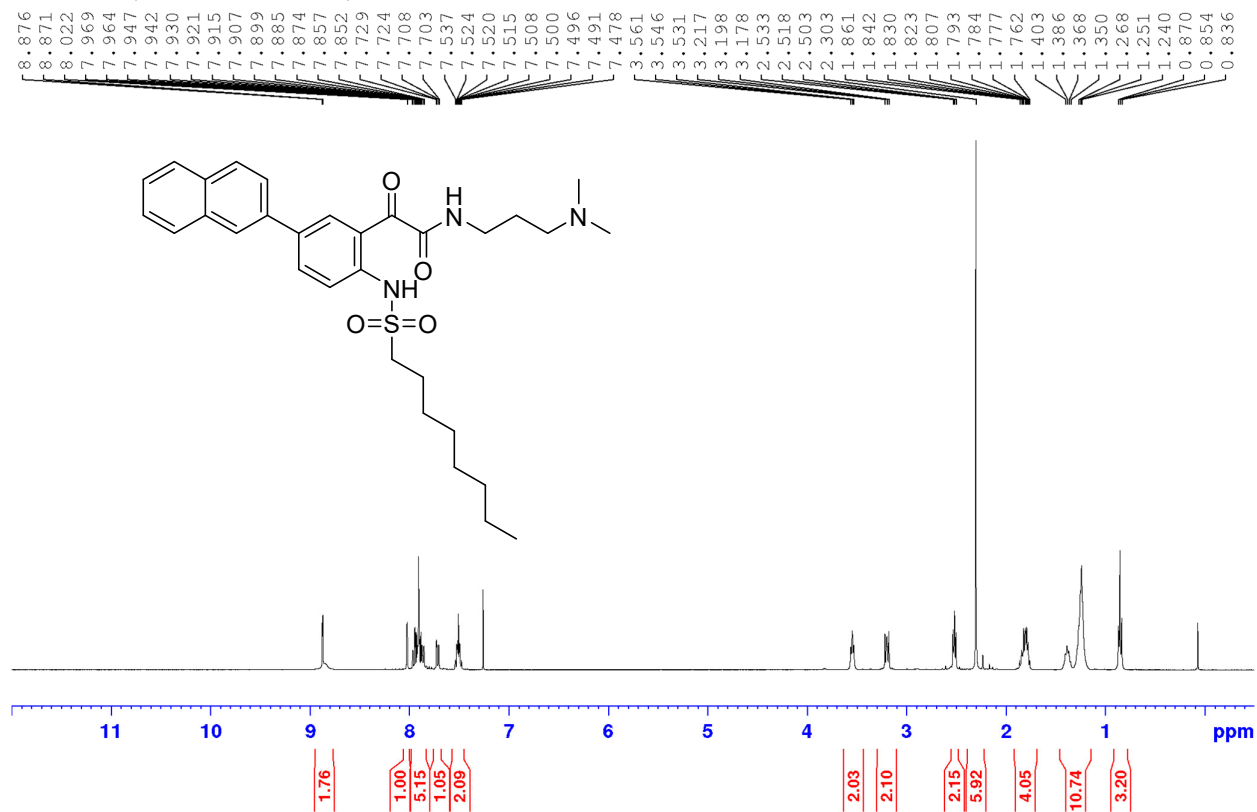

<sup>13</sup>C NMR (100 MHz, CDCl<sub>3</sub>):

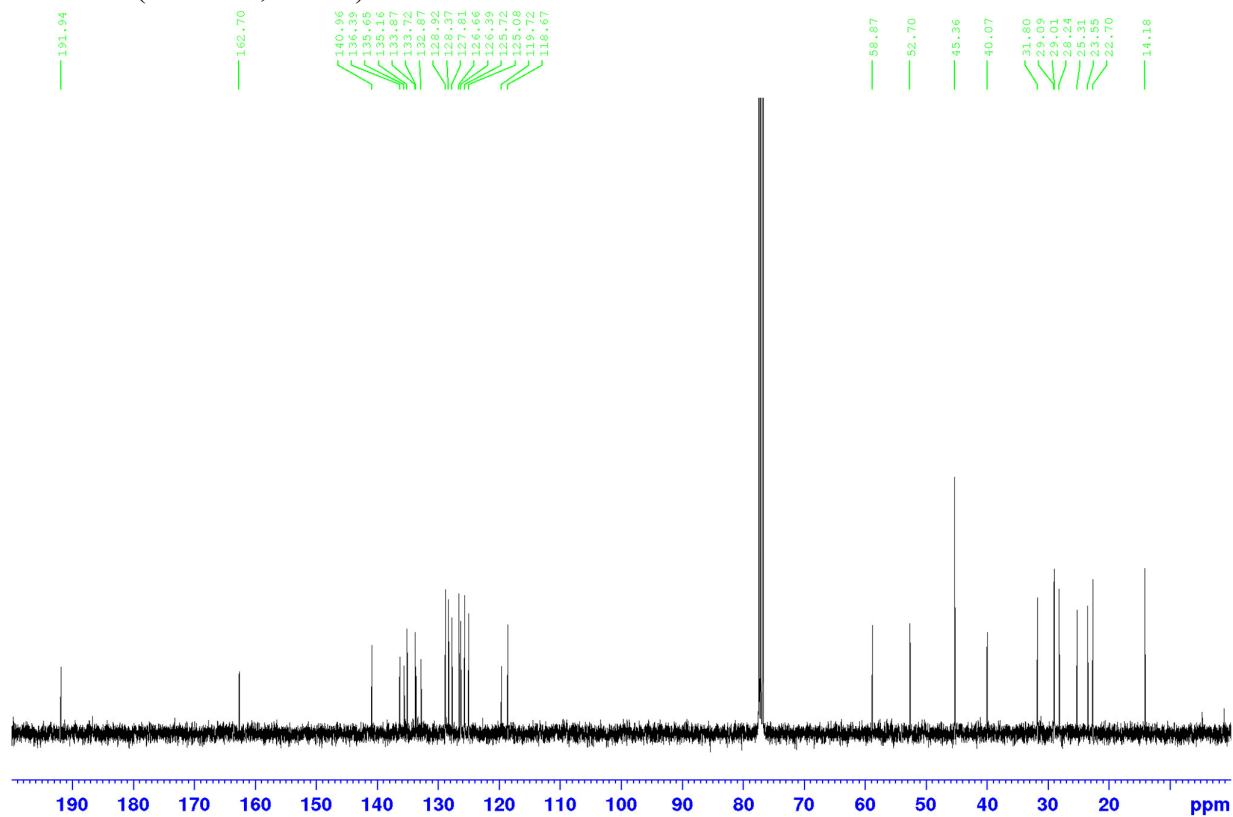

2-(5-Butyl-2-(octylsulfonamido)phenyl)-N-(3-(dimethylamino)propyl)-2-oxoacetamide (**11e**)

$^1\text{H}$  NMR (400 MHz,  $\text{CDCl}_3$ ):

8.649  
8.211  
8.206  
7.677  
7.655  
7.419  
7.414  
7.398  
7.393

3.522  
3.129  
3.110  
3.090  
2.618  
2.599  
2.579  
2.558  
2.543  
2.336  
1.827  
1.812  
1.797  
1.785  
1.774  
1.766  
1.758  
1.747  
1.727  
1.616  
1.598  
1.578  
1.559  
1.540  
1.395  
1.376  
1.358

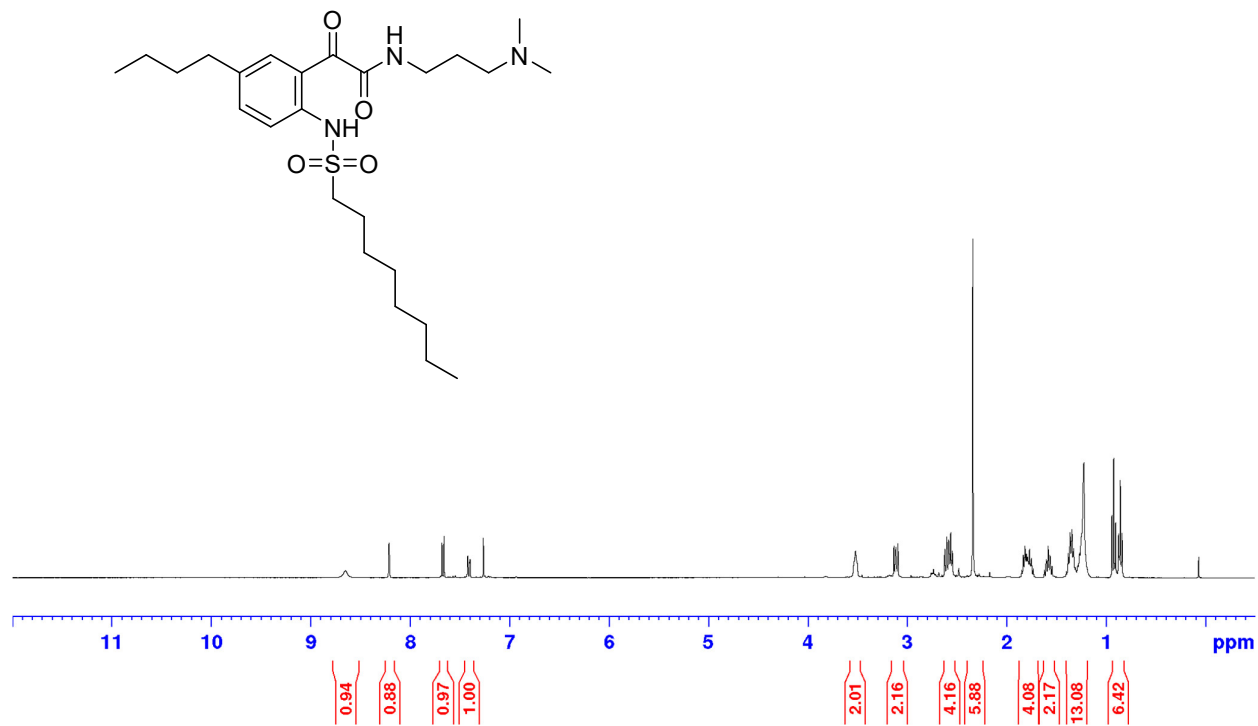

$^{13}\text{C}$  NMR (100 MHz,  $\text{CDCl}_3$ ):

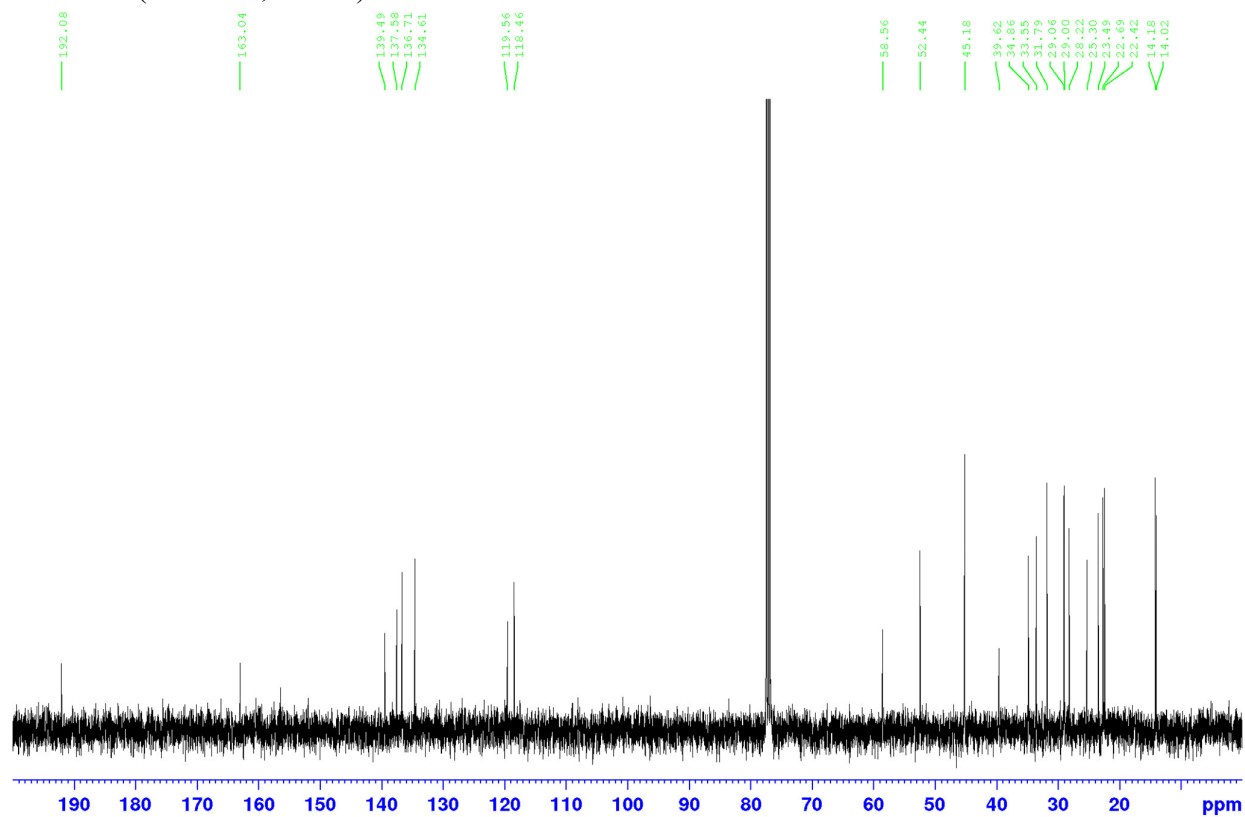

2-(4-(Butylsulfonamido)-[1,1'-biphenyl]-3-yl)-N-(3-(dimethylamino)propyl)-2-oxoacetamide (**12a**)

$^1\text{H}$  NMR (400 MHz,  $\text{CDCl}_3$ ):

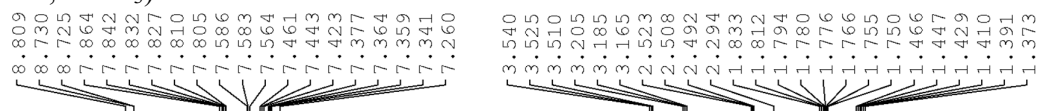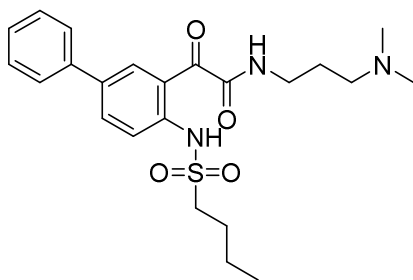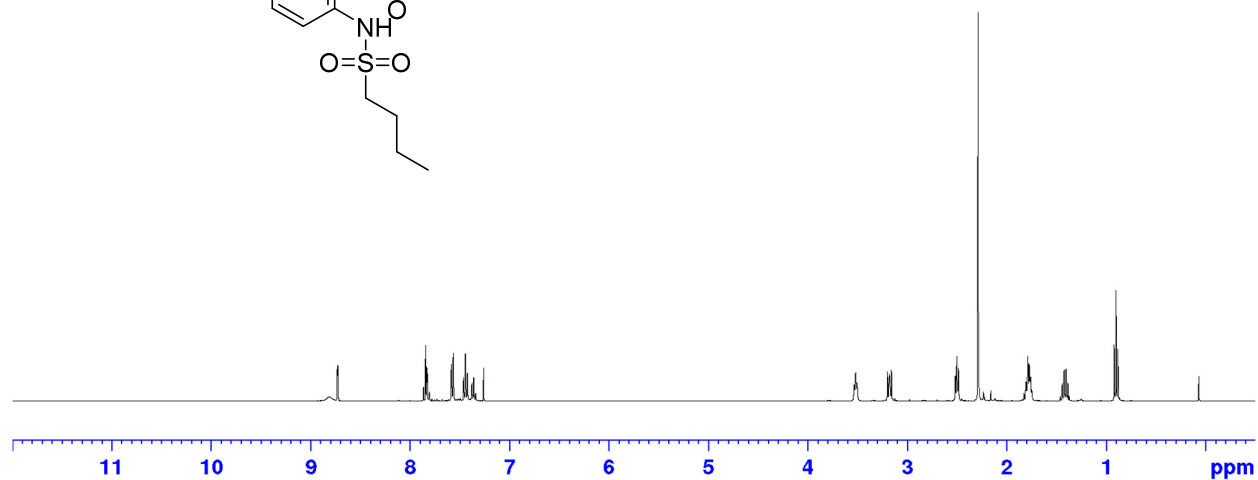

$^{13}\text{C}$  NMR (100 MHz,  $\text{CDCl}_3$ ):

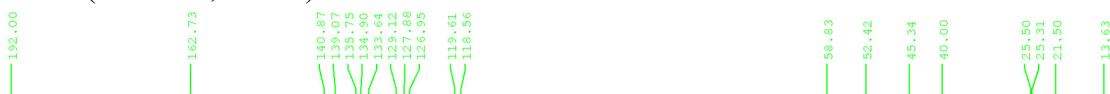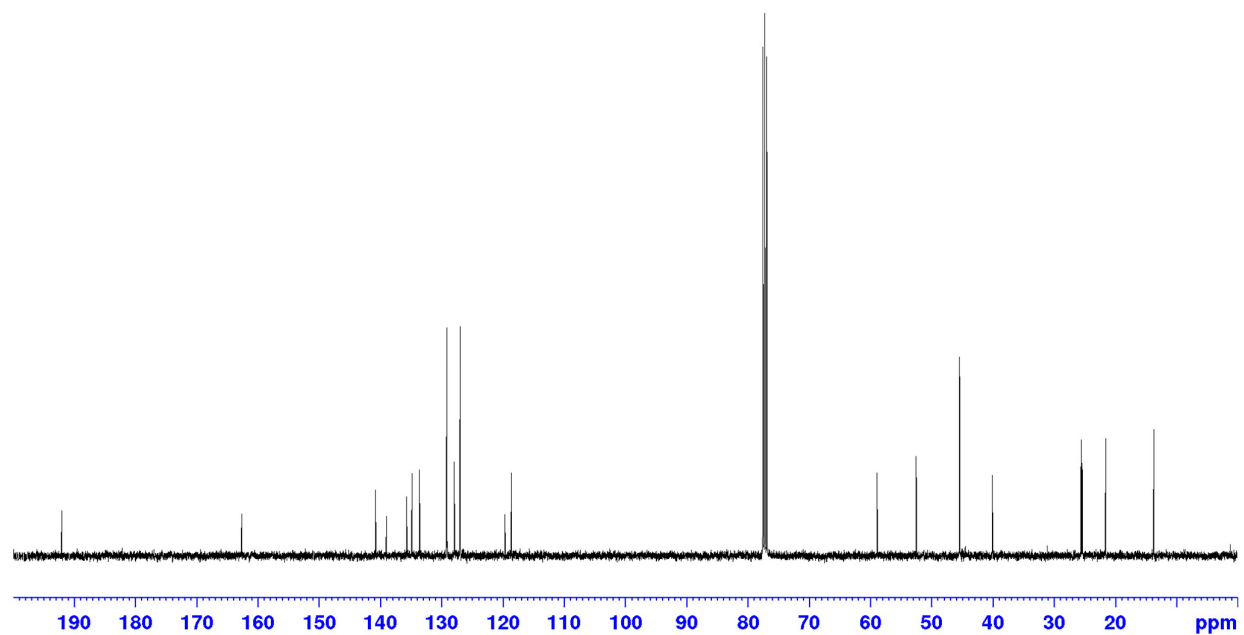

*N,N*-Dimethyl-3-(2-(4-(octylsulfonamido)-[1,1'-biphenyl]-3-yl)-2-oxoacetamido)propan-1-aminium chloride (**13a**)

<sup>1</sup>H NMR (600 MHz, DMSO-*d*<sub>6</sub>):

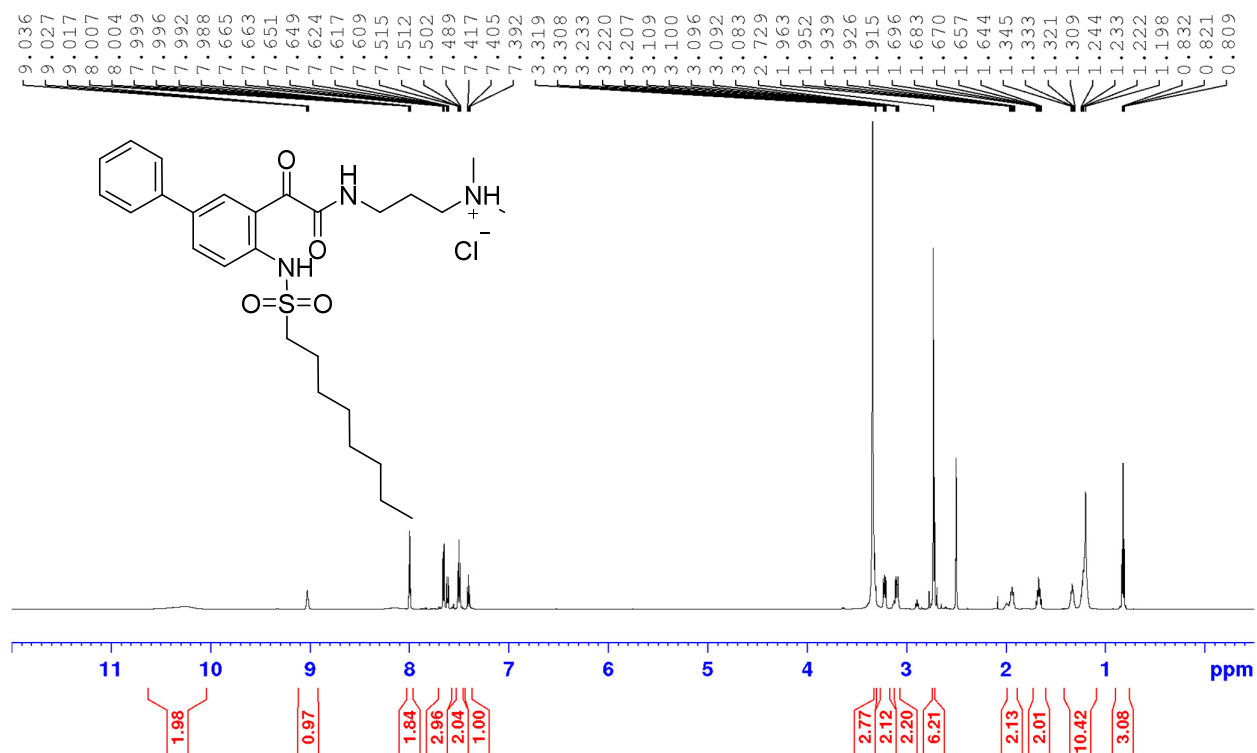

<sup>13</sup>C NMR (150 MHz, DMSO-*d*<sub>6</sub>):

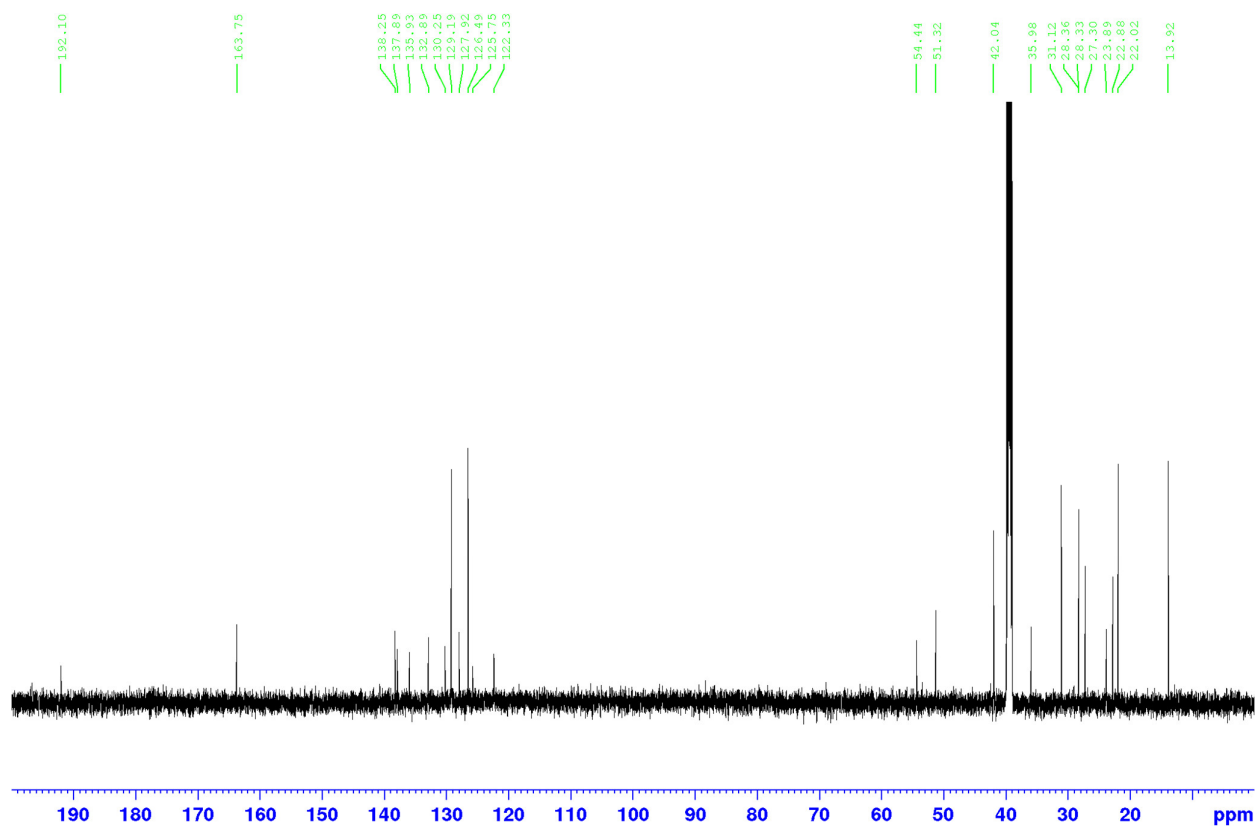

3-(2-(4'-Fluoro-4-(octylsulfonamido)-[1,1'-biphenyl]-3-yl)-2-oxoacetamido)-*N,N*-dimethylpropan-1-aminium chloride (**13b**)

<sup>1</sup>H NMR (600 MHz, DMSO-*d*<sub>6</sub>):

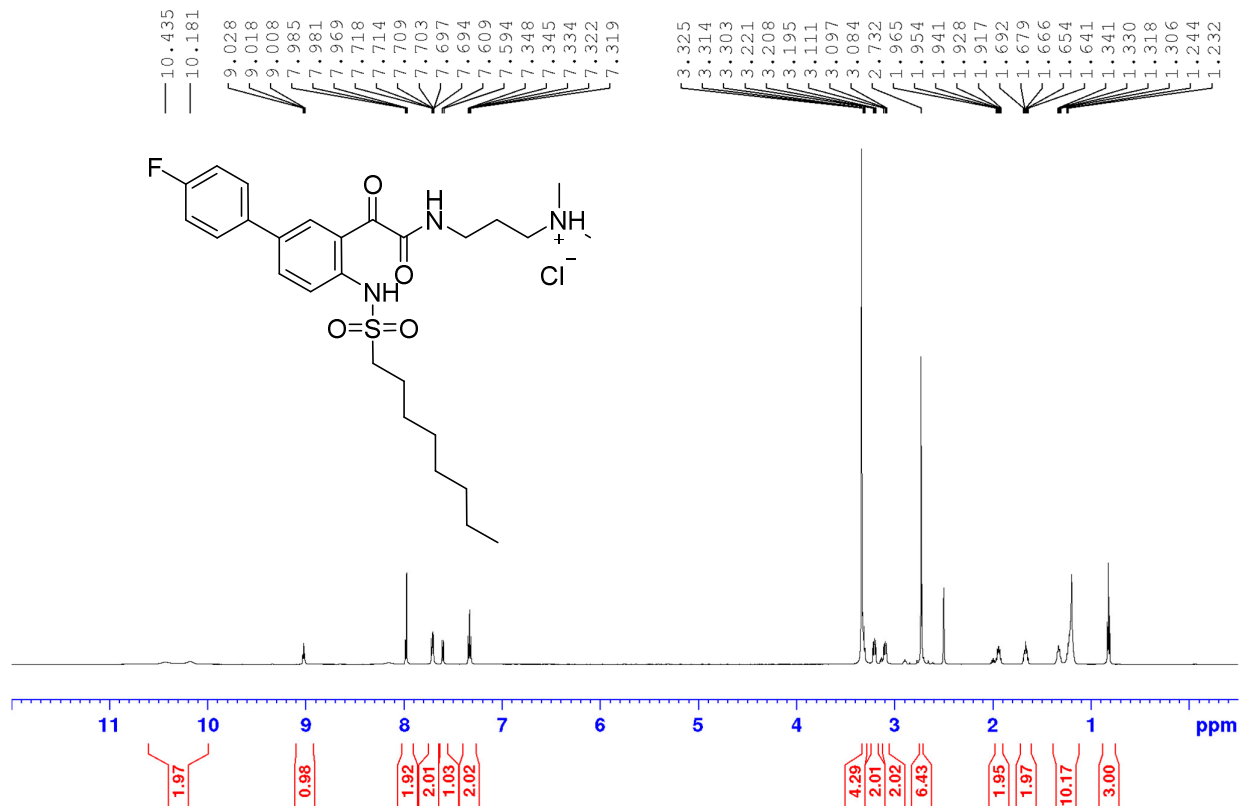

<sup>13</sup>C NMR (150 MHz, DMSO-*d*<sub>6</sub>):

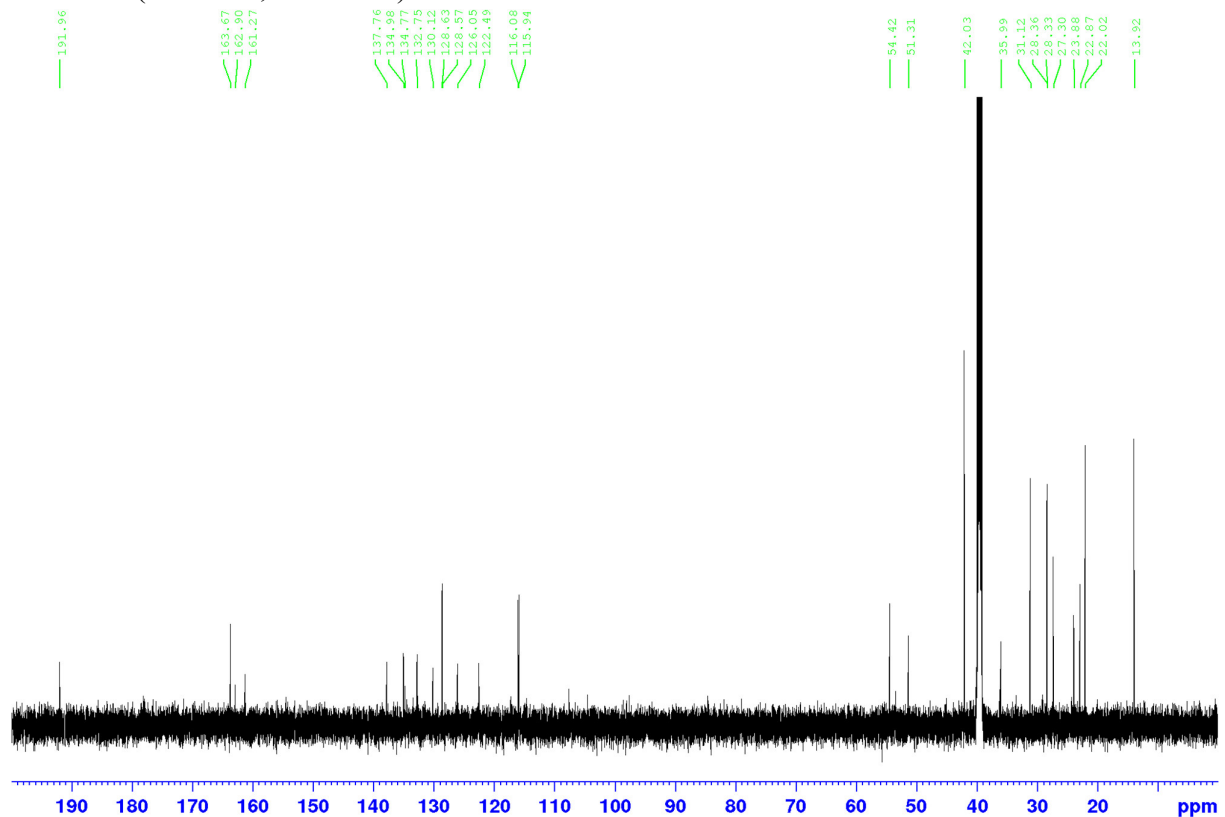

3-(2-(4'-Chloro-4-(octylsulfonamido)-[1,1'-biphenyl]-3-yl)-2-oxoacetamido)-*N,N*-dimethylpropan-1-aminium chloride (**13c**)

$^1\text{H}$  NMR (600 MHz,  $\text{DMSO-}d_6$ ):

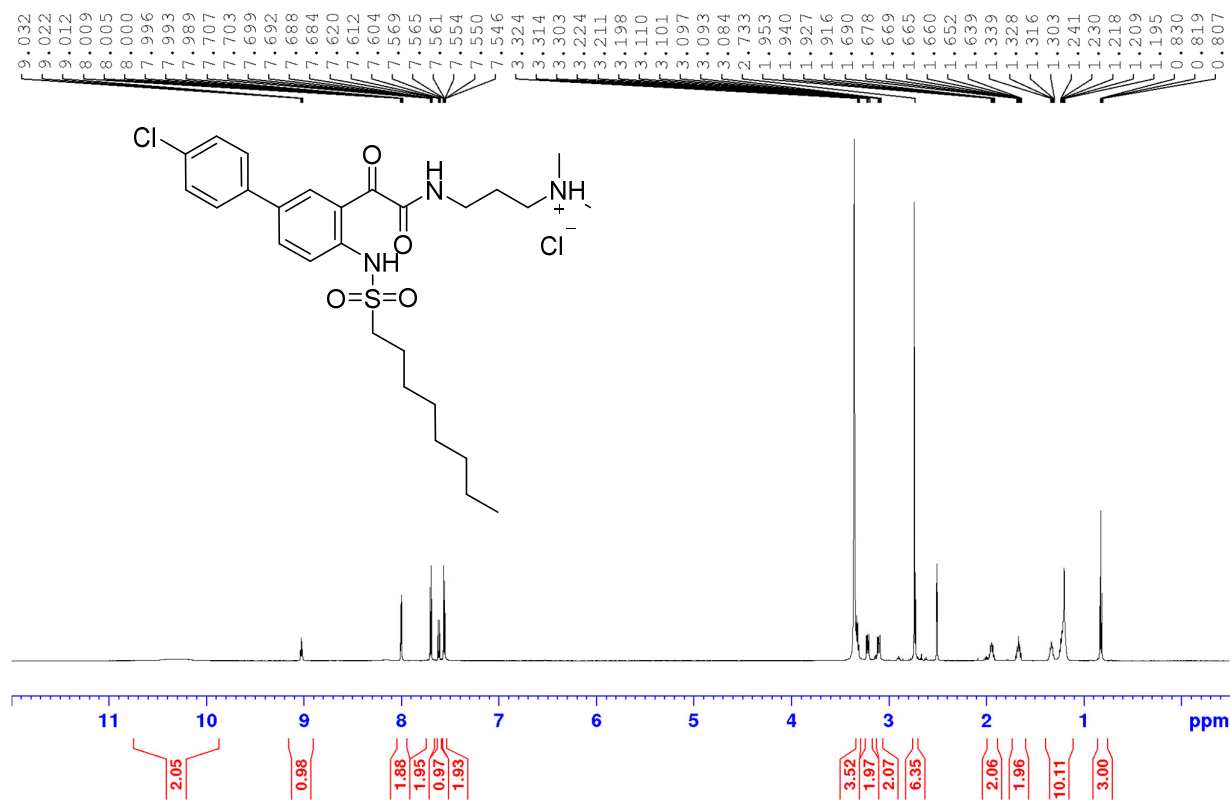

$^{13}\text{C}$  NMR (150 MHz,  $\text{DMSO-}d_6$ ):

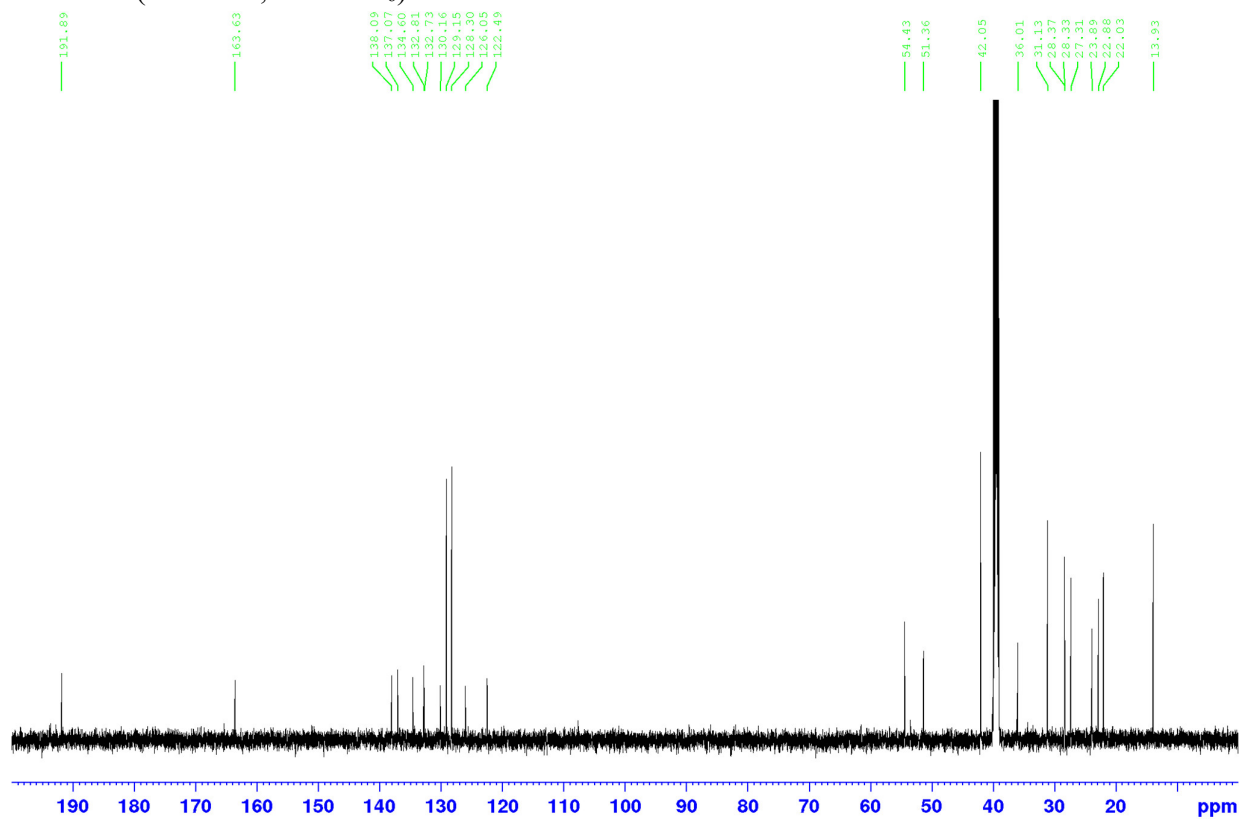



*N,N*-Dimethyl-3-(2-(5-(naphthalen-2-yl)-2-(octylsulfonamido)phenyl)-2-oxoacetamido)propan-1-aminium chloride (**13d**)

<sup>1</sup>H NMR (600 MHz, DMSO-*d*<sub>6</sub>):

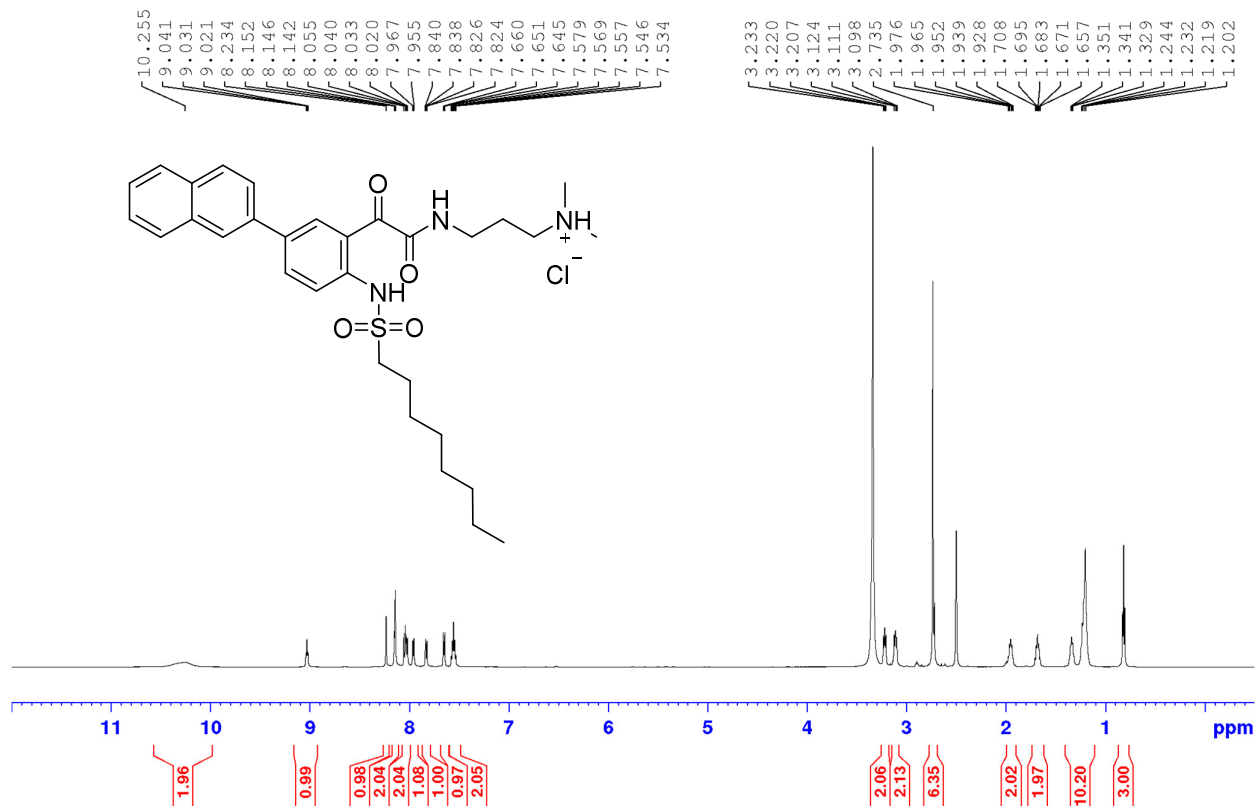

<sup>13</sup>C NMR (150 MHz, DMSO-*d*<sub>6</sub>):

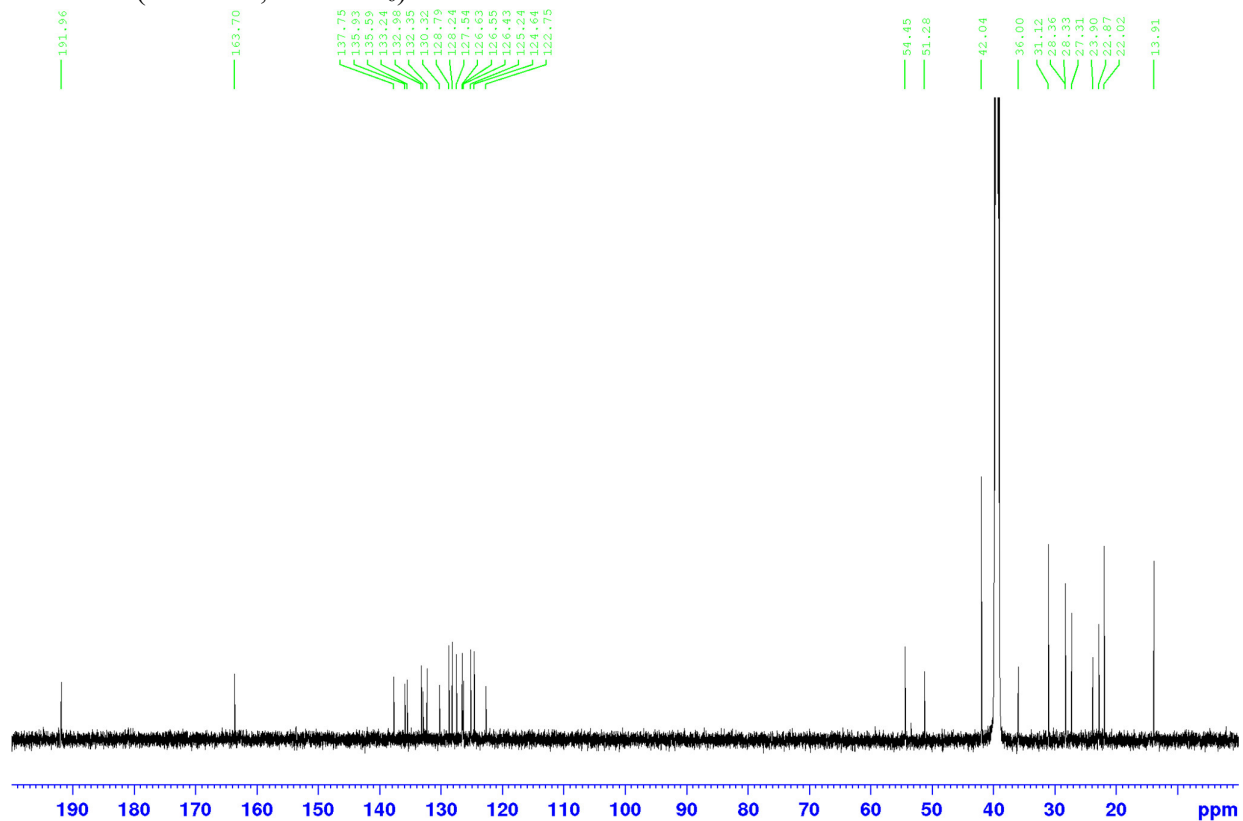

3-(2-(5-Butyl-2-(octylsulfonamido)phenyl)-2-oxoacetamido)-*N,N*-dimethylpropan-1-aminium chloride (13e)

$^1\text{H}$  NMR (600 MHz,  $\text{DMSO-}d_6$ ):

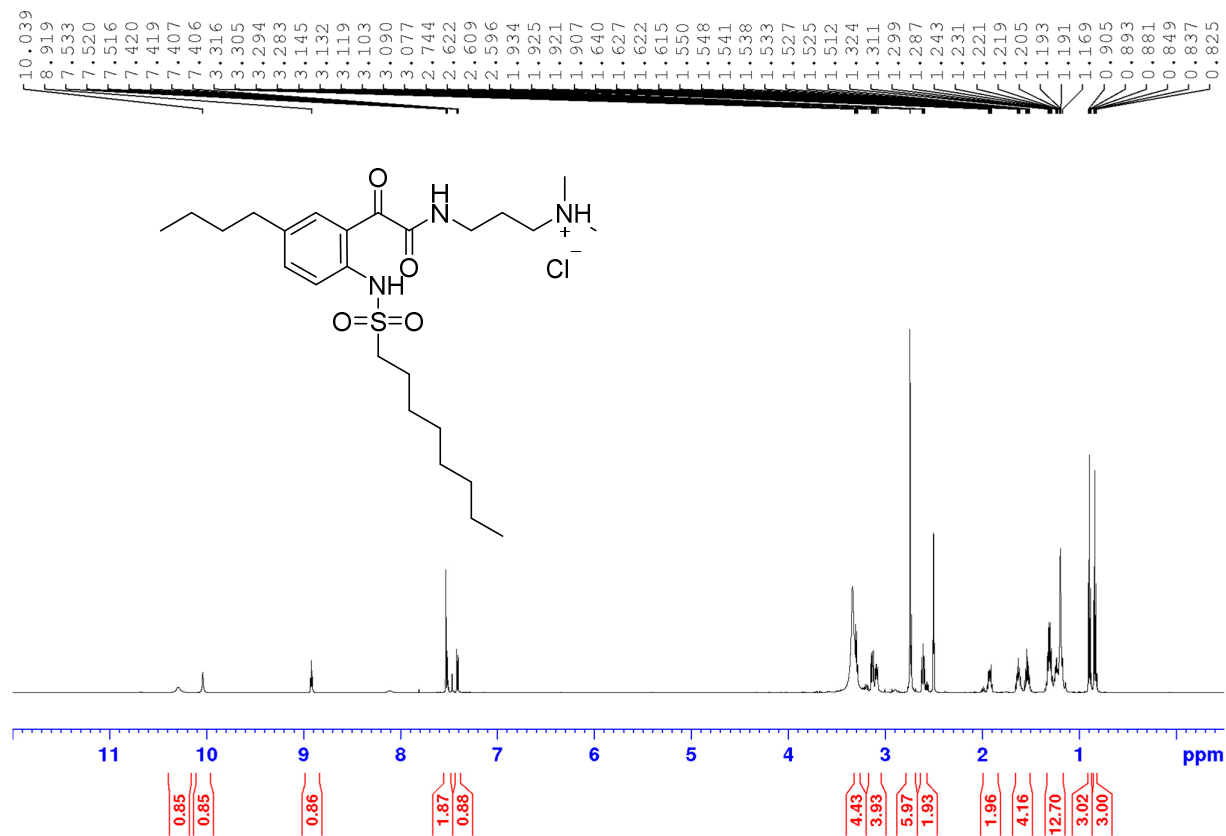

$^{13}\text{C}$  NMR (150 MHz,  $\text{DMSO-}d_6$ ):

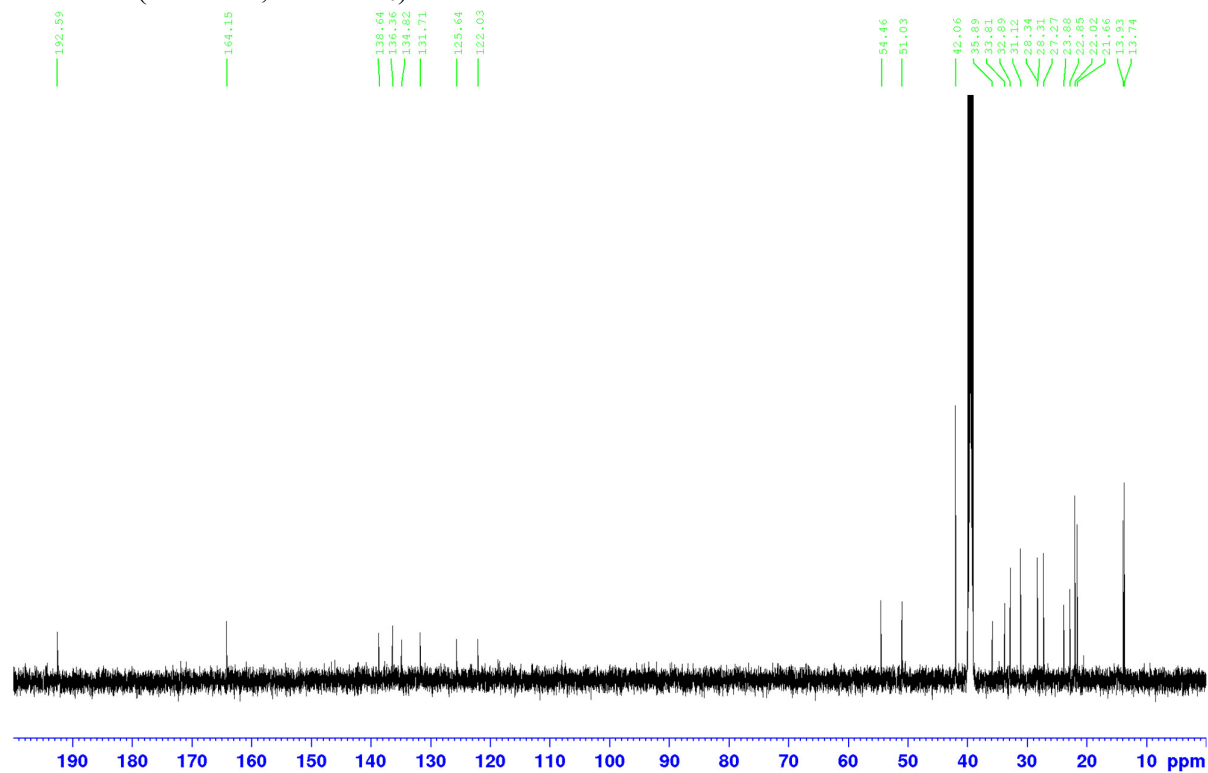

3-(2-(4-(Butylsulfonamido)-[1,1'-biphenyl]-3-yl)-2-oxoacetamido)-*N,N*-dimethylpropan-1-aminium chloride (**14a**)

$^1\text{H}$  NMR (600 MHz,  $\text{DMSO-}d_6$ ):

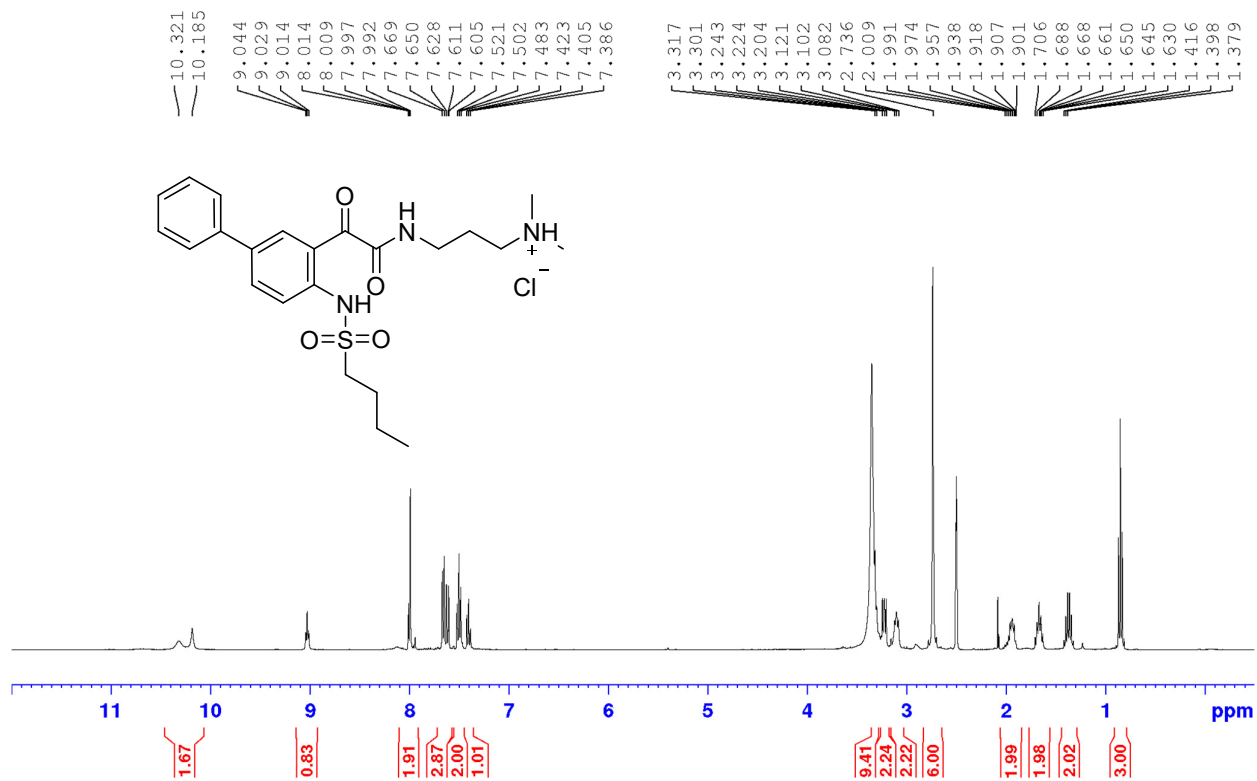

$^{13}\text{C}$  NMR (150 MHz,  $\text{DMSO-}d_6$ ):

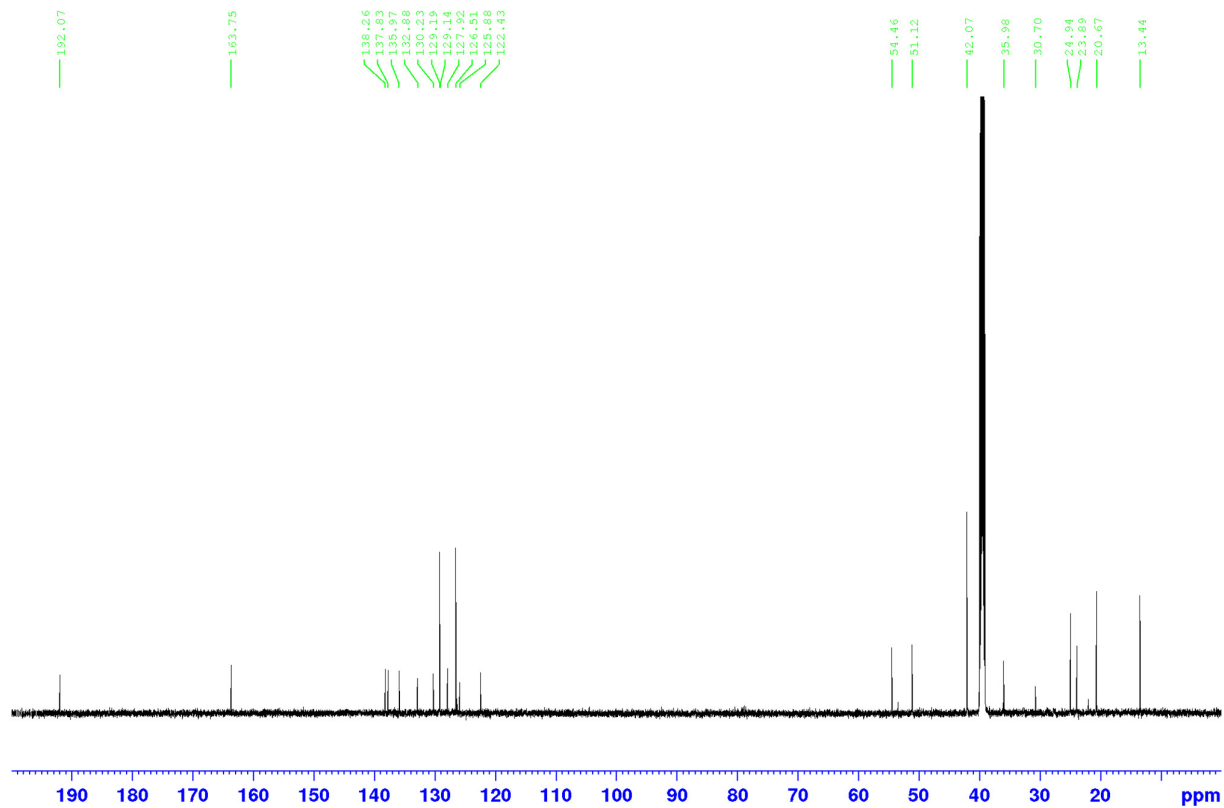

*N,N,N*-Trimethyl-3-(2-(4-(octylsulfonamido)-[1,1'-biphenyl]-3-yl)-2-oxoacetamido)propan-1-aminium iodide (**15a**)

$^1\text{H}$  NMR (600 MHz,  $\text{DMSO-}d_6$ ):

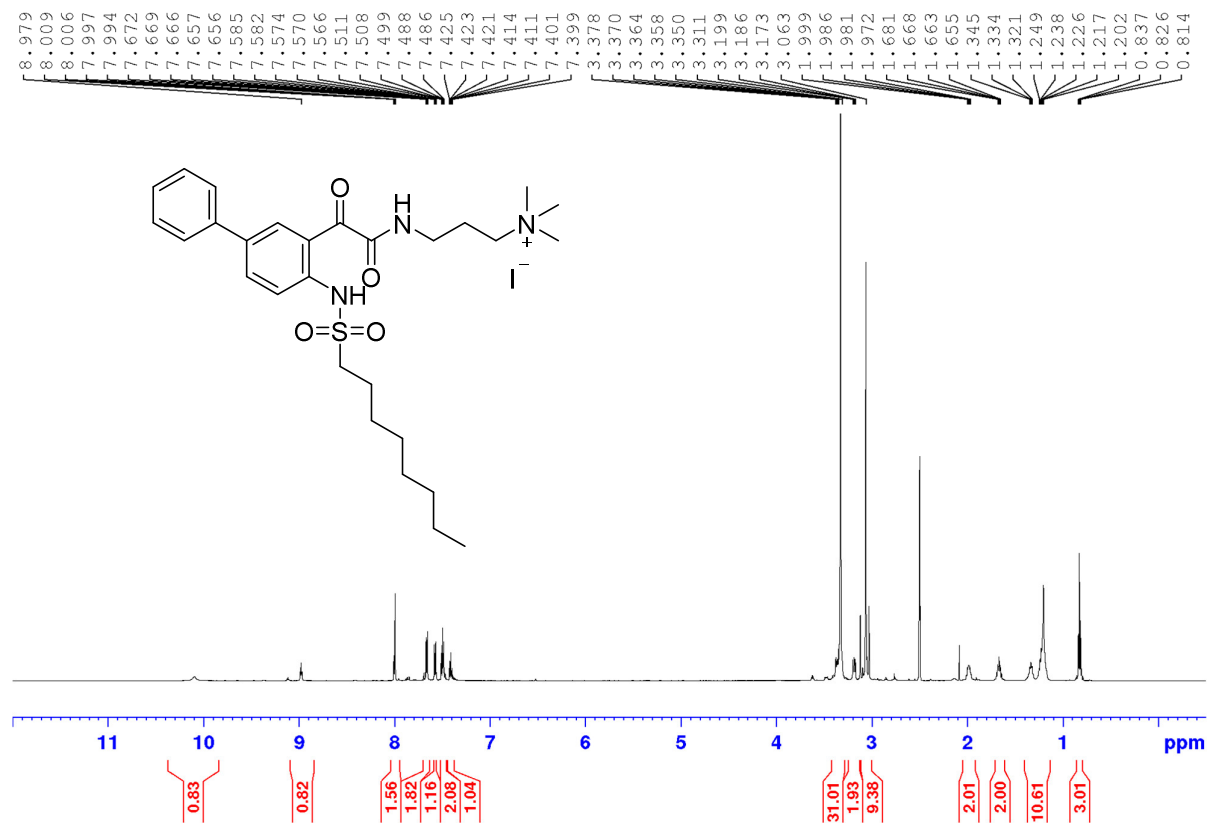

$^{13}\text{C}$  NMR (150 MHz,  $\text{DMSO-}d_6$ ):

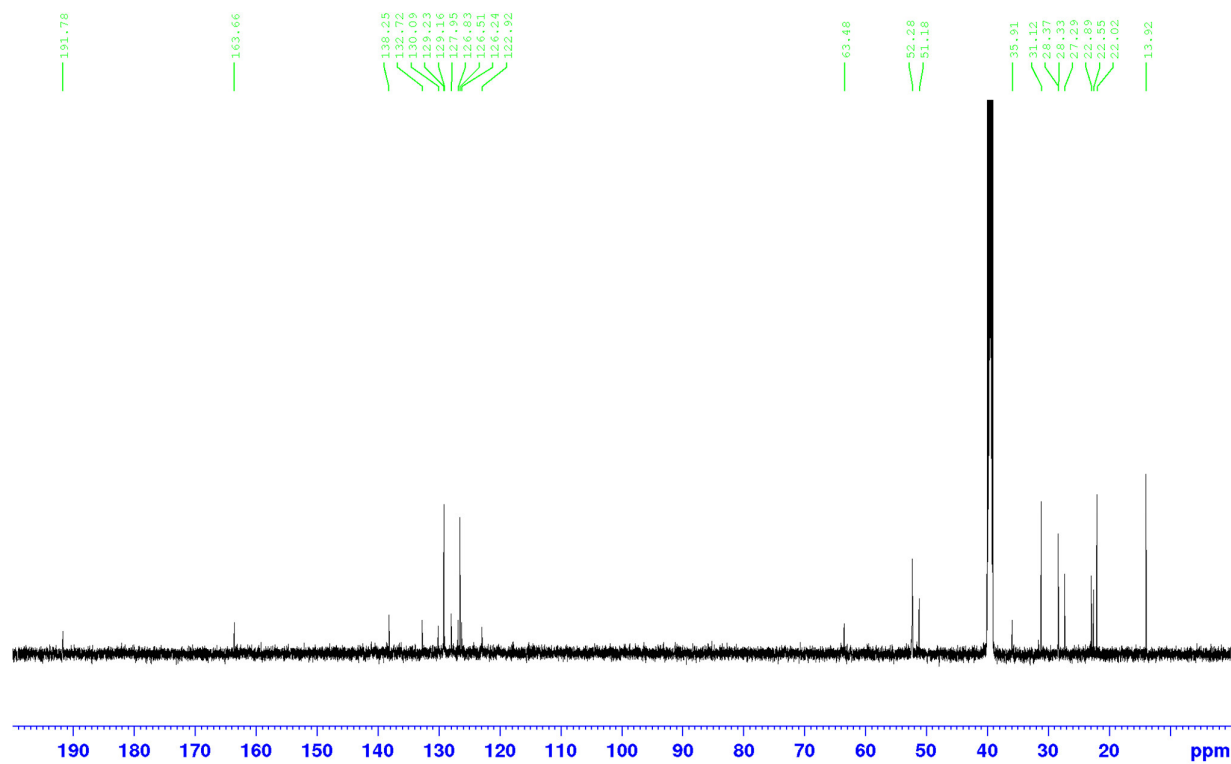

3-(2-(4'-Fluoro-4-(octylsulfonamido)-[1,1'-biphenyl]-3-yl)-2-oxoacetamido)-*N,N,N*-trimethylpropan-1-aminium iodide (**15b**)

$^1\text{H}$  NMR (600 MHz,  $\text{DMSO-}d_6$ ):

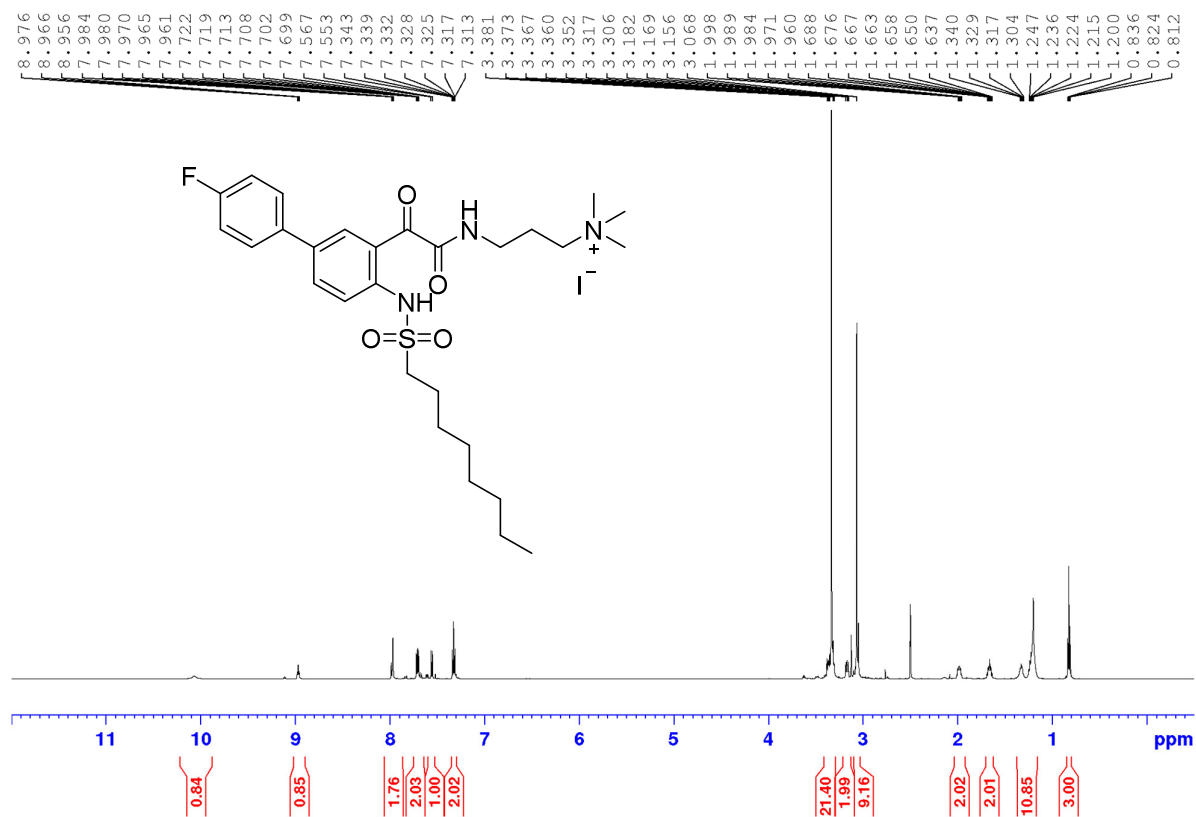

$^{13}\text{C}$  NMR (150 MHz,  $\text{DMSO-}d_6$ ):

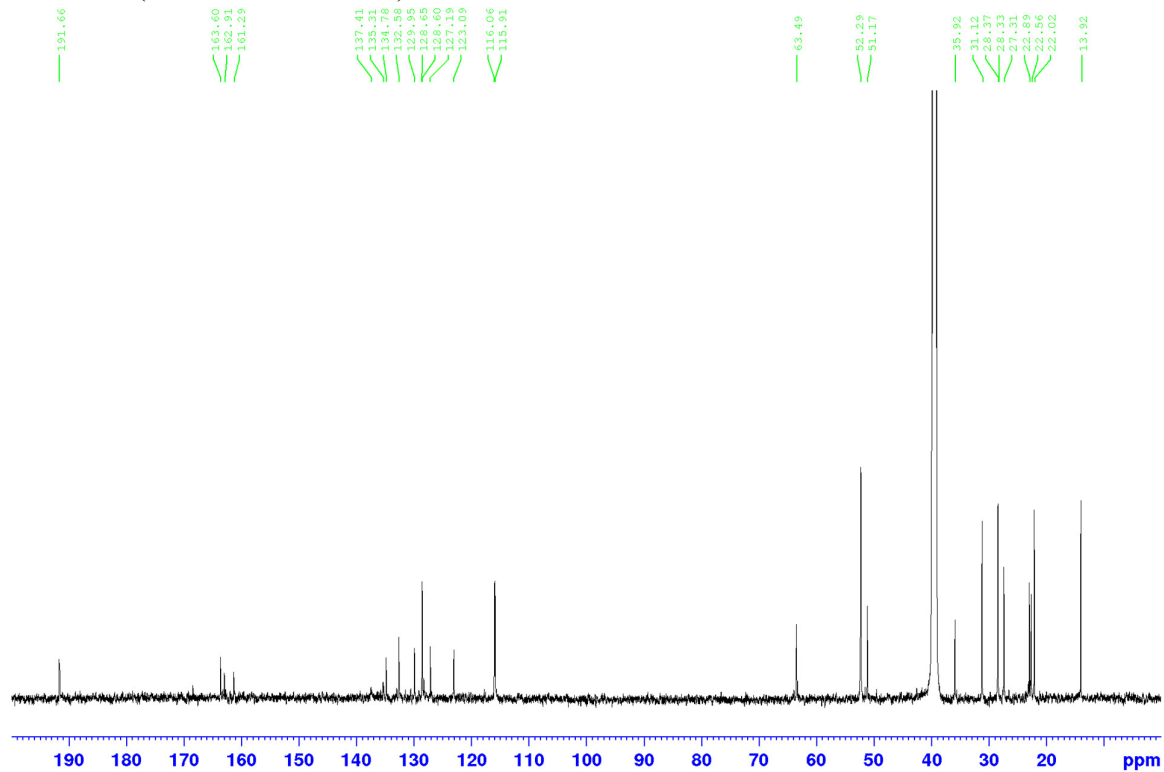

3-(2-(4'-Chloro-4-(octylsulfonamido)-[1,1'-biphenyl]-3-yl)-2-oxoacetamido)-*N,N,N*-trimethylpropan-1-aminium iodide (**15c**)

$^1\text{H}$  NMR (600 MHz,  $\text{DMSO-}d_6$ ):

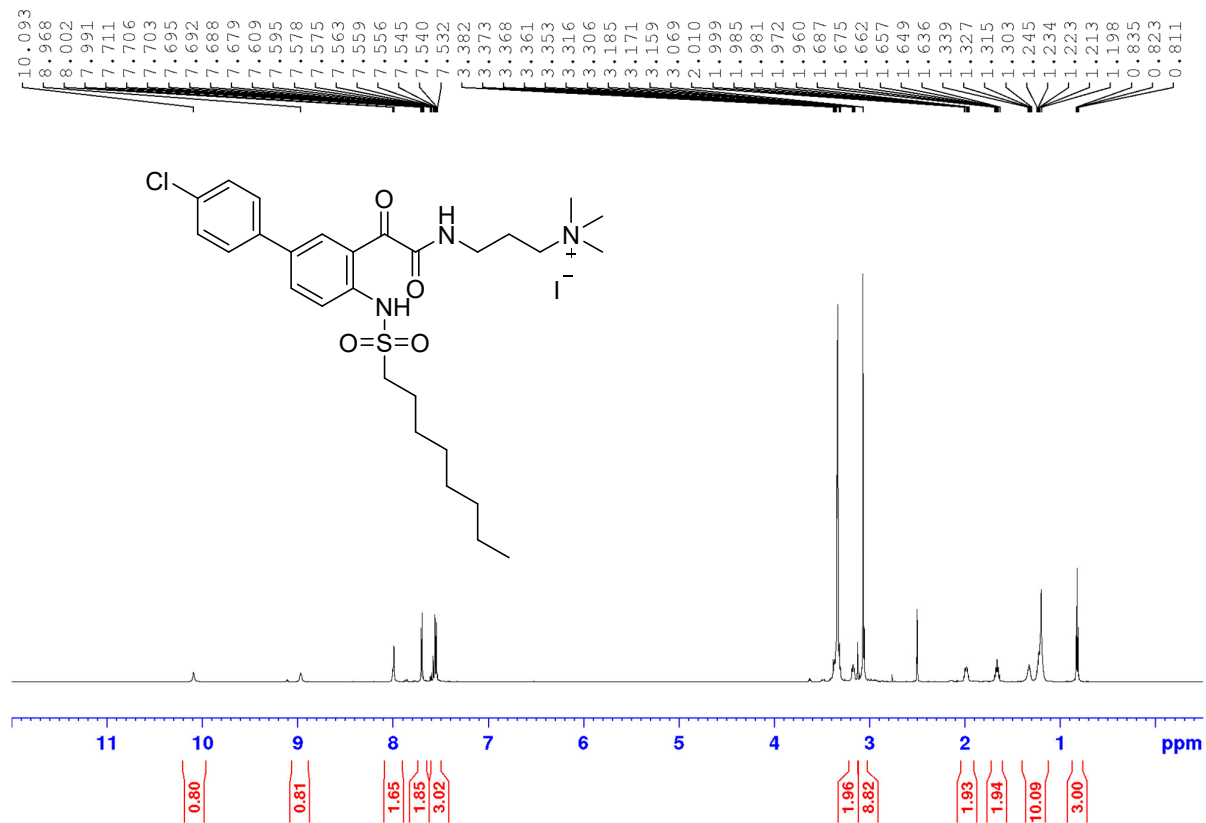

$^{13}\text{C}$  NMR (150 MHz,  $\text{DMSO-}d_6$ ):

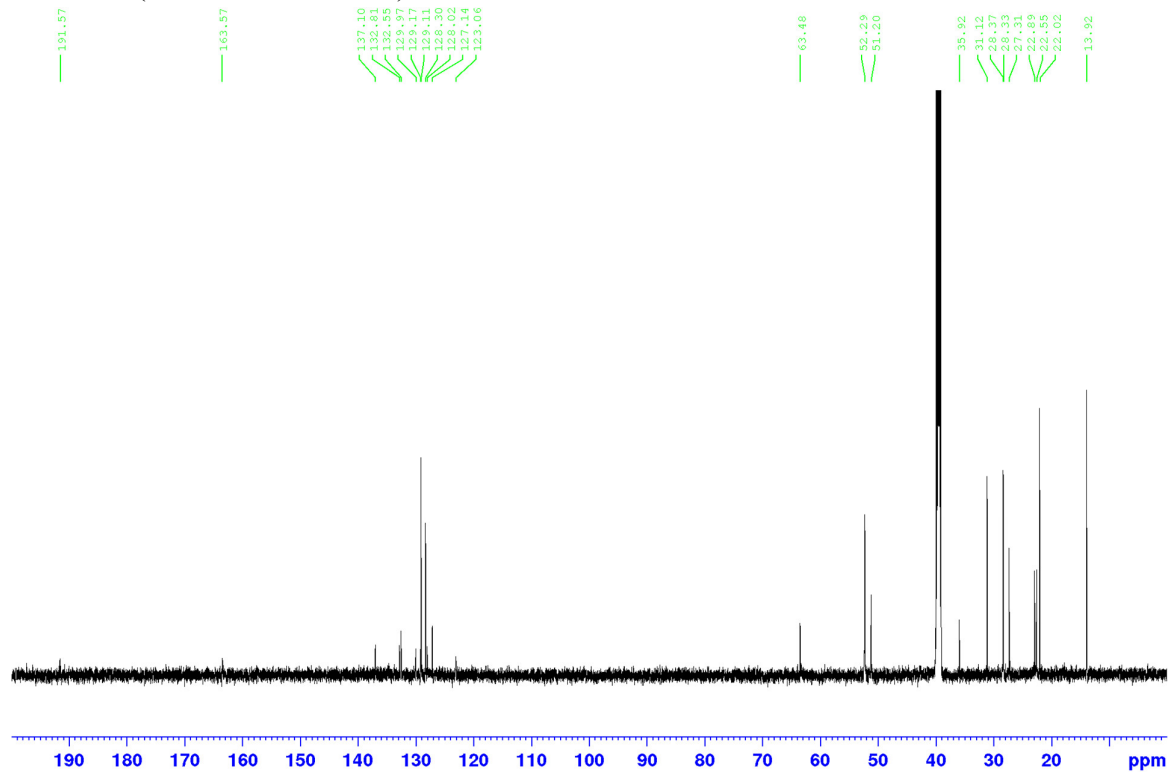

*N,N,N*-Trimethyl-3-(2-(5-(naphthalen-2-yl)-2-(octylsulfonamido)phenyl)-2-oxoacetamido)propan-1-aminium iodide (**15d**)

$^1\text{H}$  NMR (600 MHz,  $\text{DMSO-}d_6$ ):

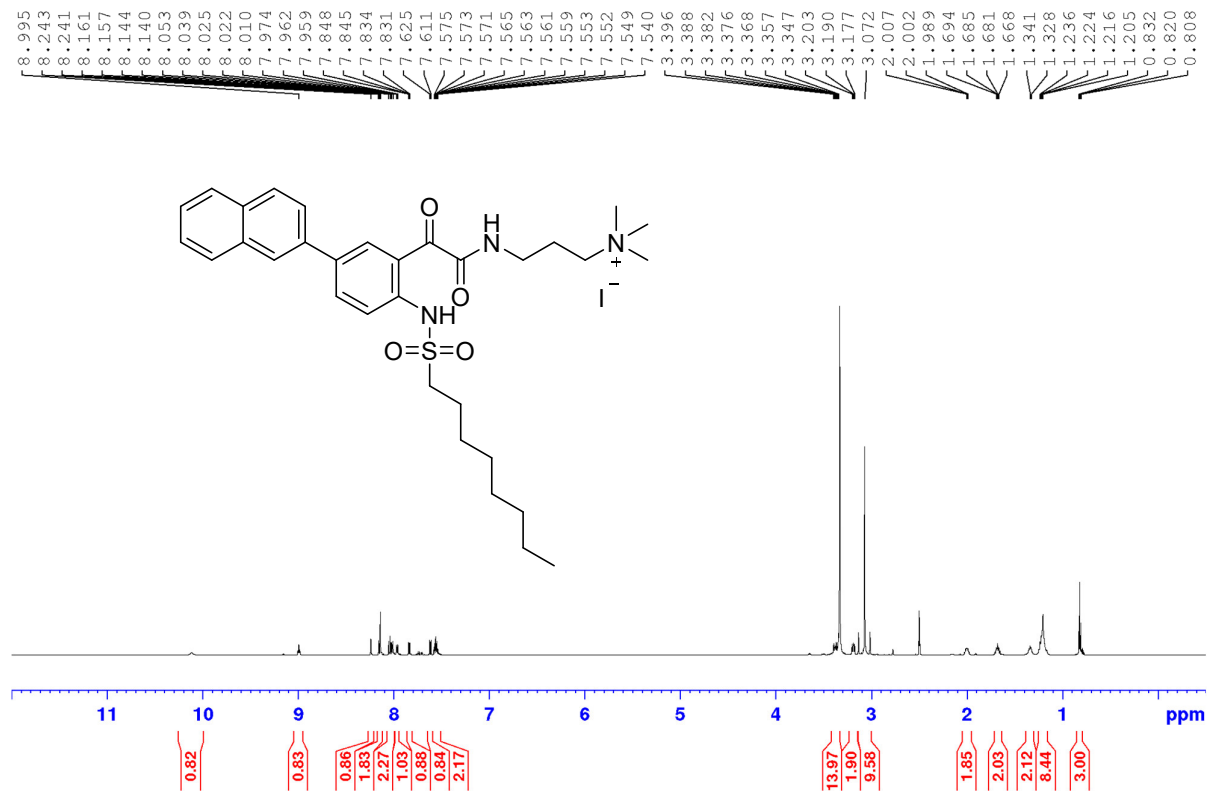

$^{13}\text{C}$  NMR (150 MHz,  $\text{DMSO-}d_6$ ):

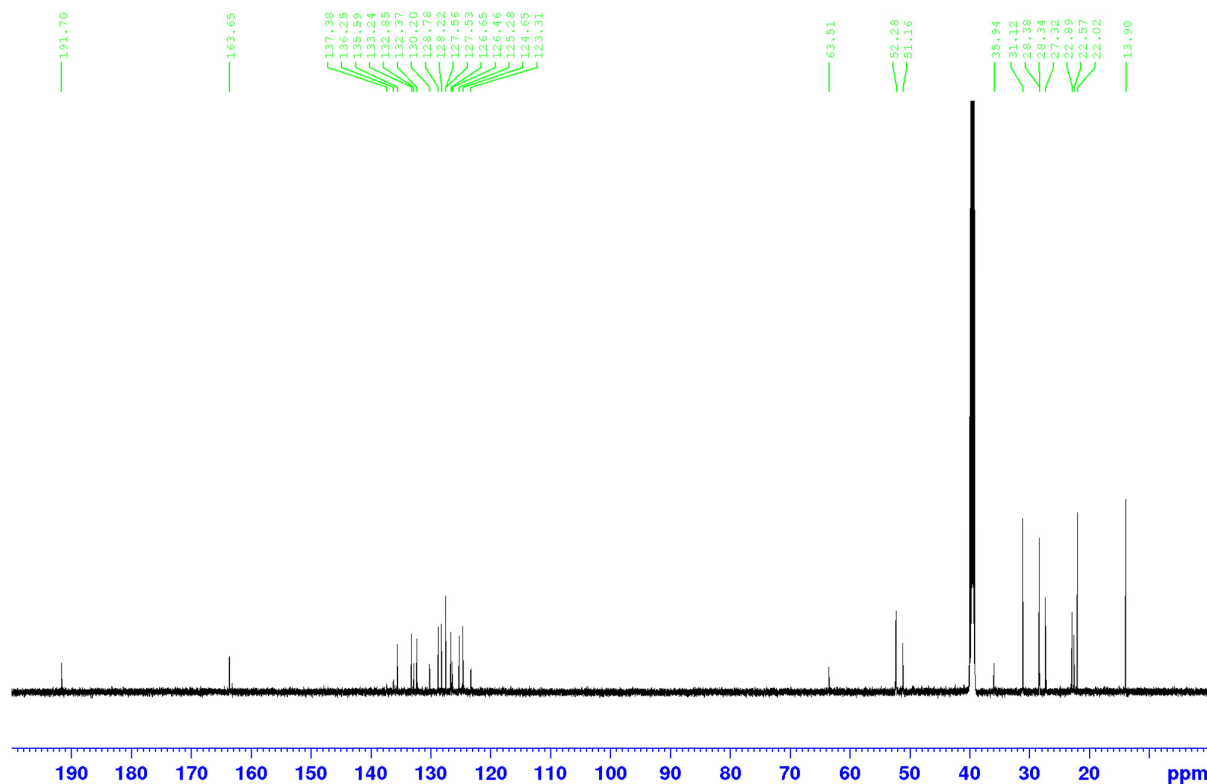

3-(2-(5-Butyl-2-(octylsulfonamido)phenyl)-2-oxoacetamido)-*N,N,N*-trimethylpropan-1-aminium iodide (**15e**)

<sup>1</sup>H NMR (600 MHz, DMSO-*d*<sub>6</sub>):

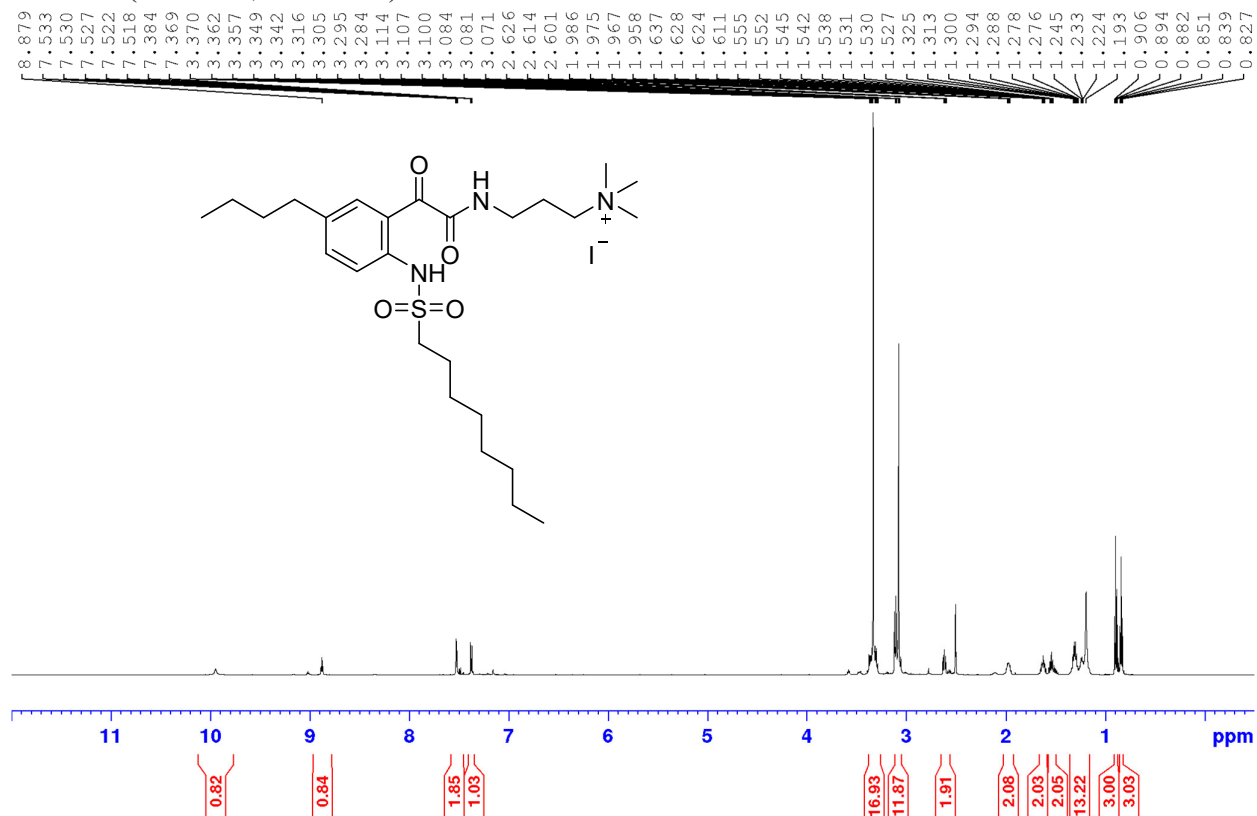

<sup>13</sup>C NMR (150 MHz, DMSO-*d*<sub>6</sub>):

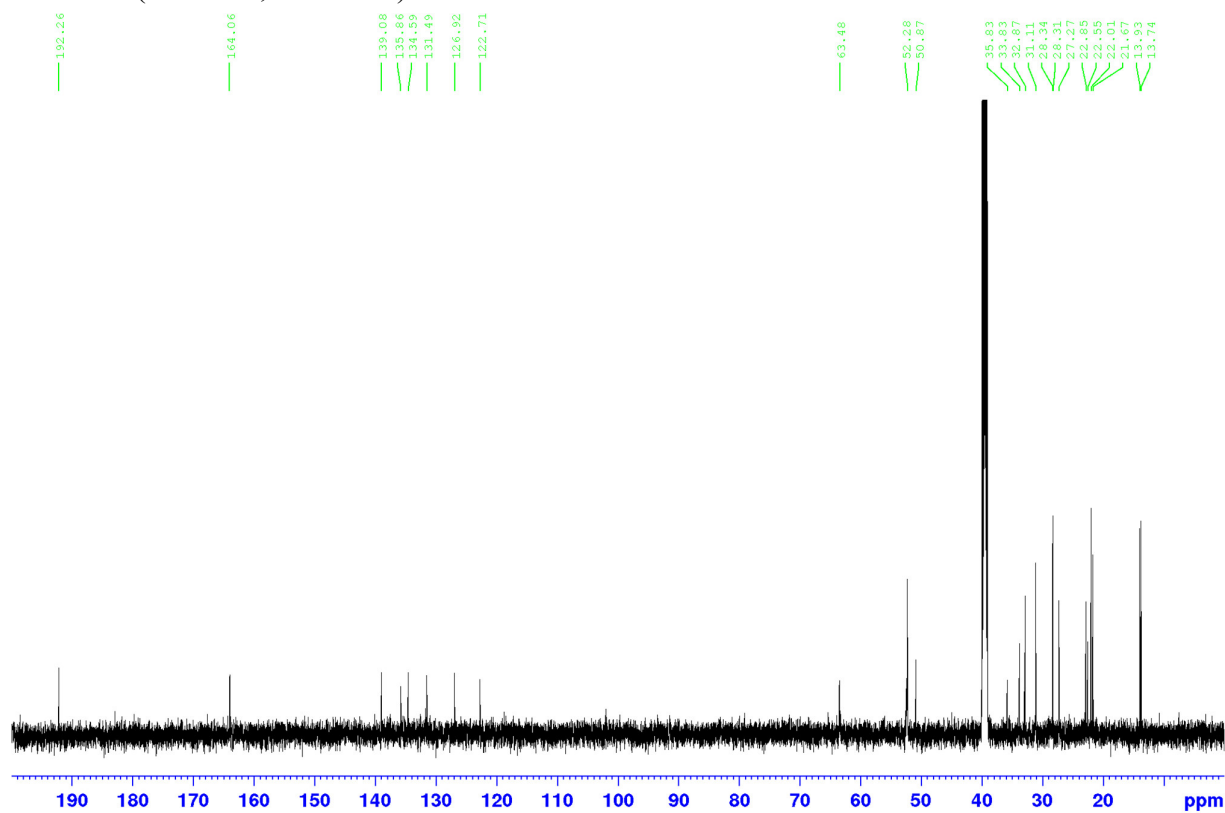



3-(2-(4-(Butylsulfonamido)-[1,1'-biphenyl]-3-yl)-2-oxoacetamido)-*N,N,N*-trimethylpropan-1-aminium iodide (**16a**)

<sup>1</sup>H NMR (600 MHz, DMSO-*d*<sub>6</sub>):

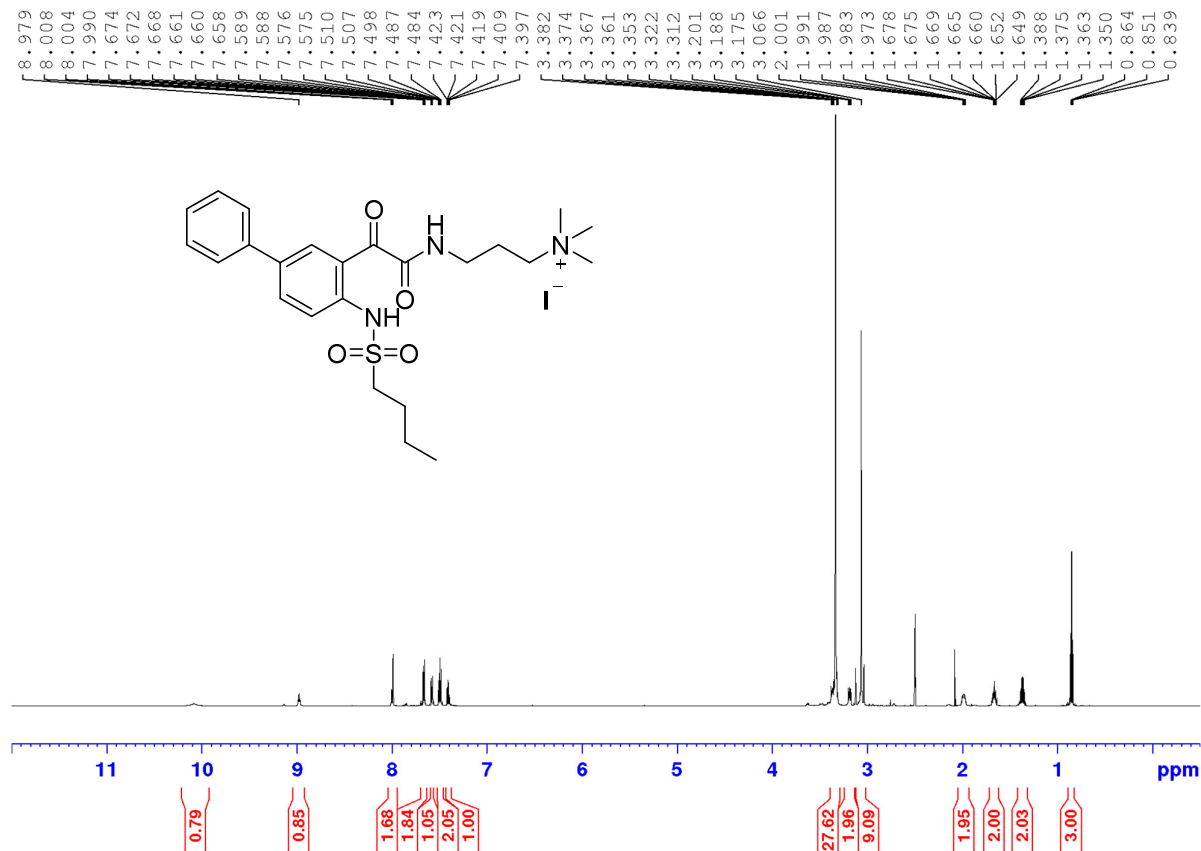

<sup>13</sup>C NMR (150 MHz, DMSO-*d*<sub>6</sub>):

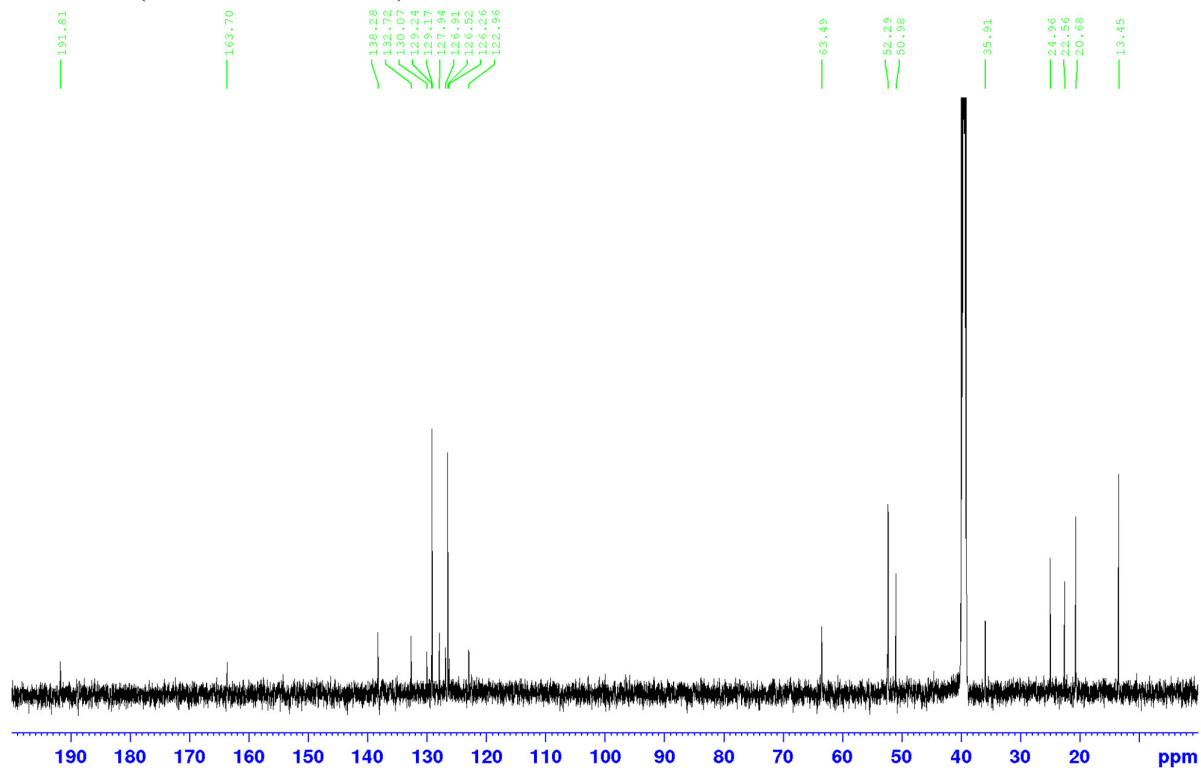

*tert*-Butyl (3-(2-(4-(octylsulfonamido)-[1,1'-biphenyl]-3-yl)-2-oxoacetamido)propyl)carbamate (**18a**)

<sup>1</sup>H NMR (600 MHz, CDCl<sub>3</sub>):

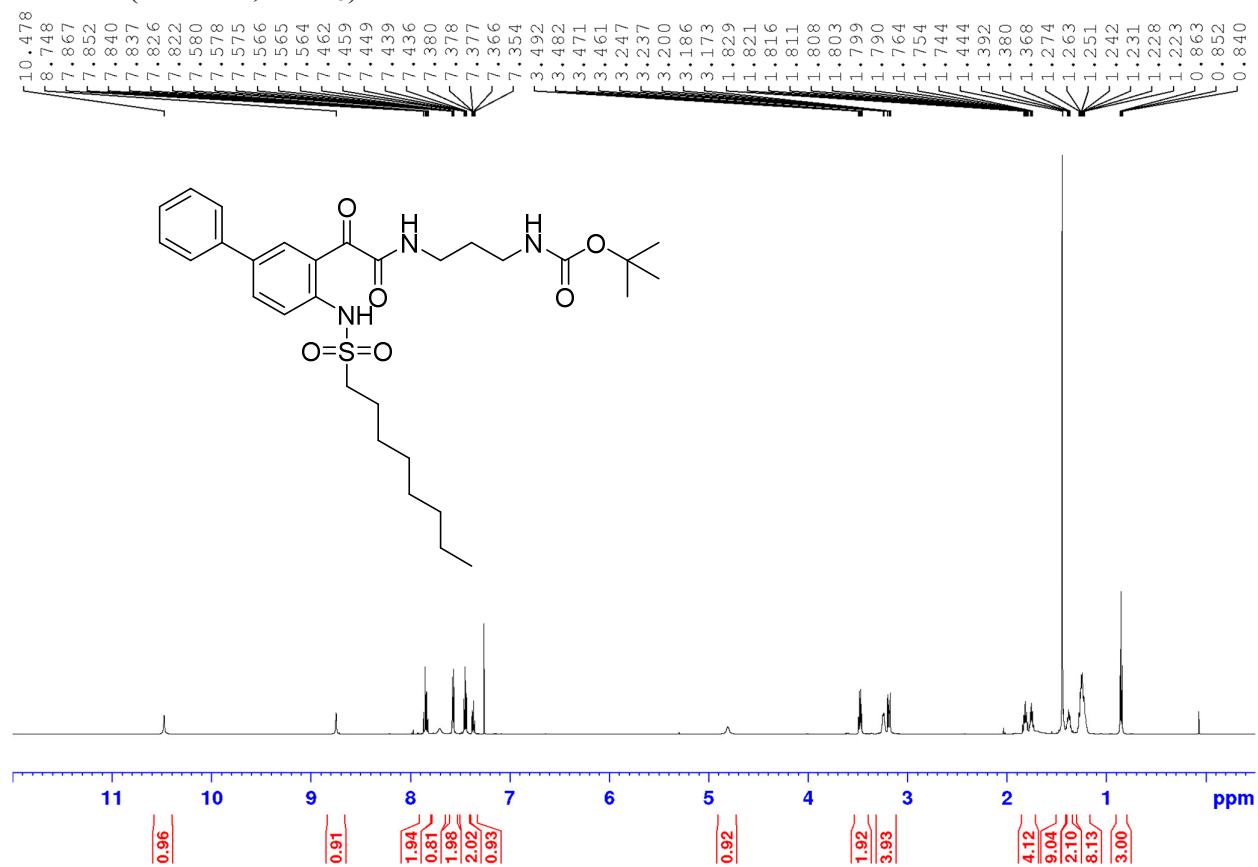

<sup>13</sup>C NMR (150 MHz, CDCl<sub>3</sub>):

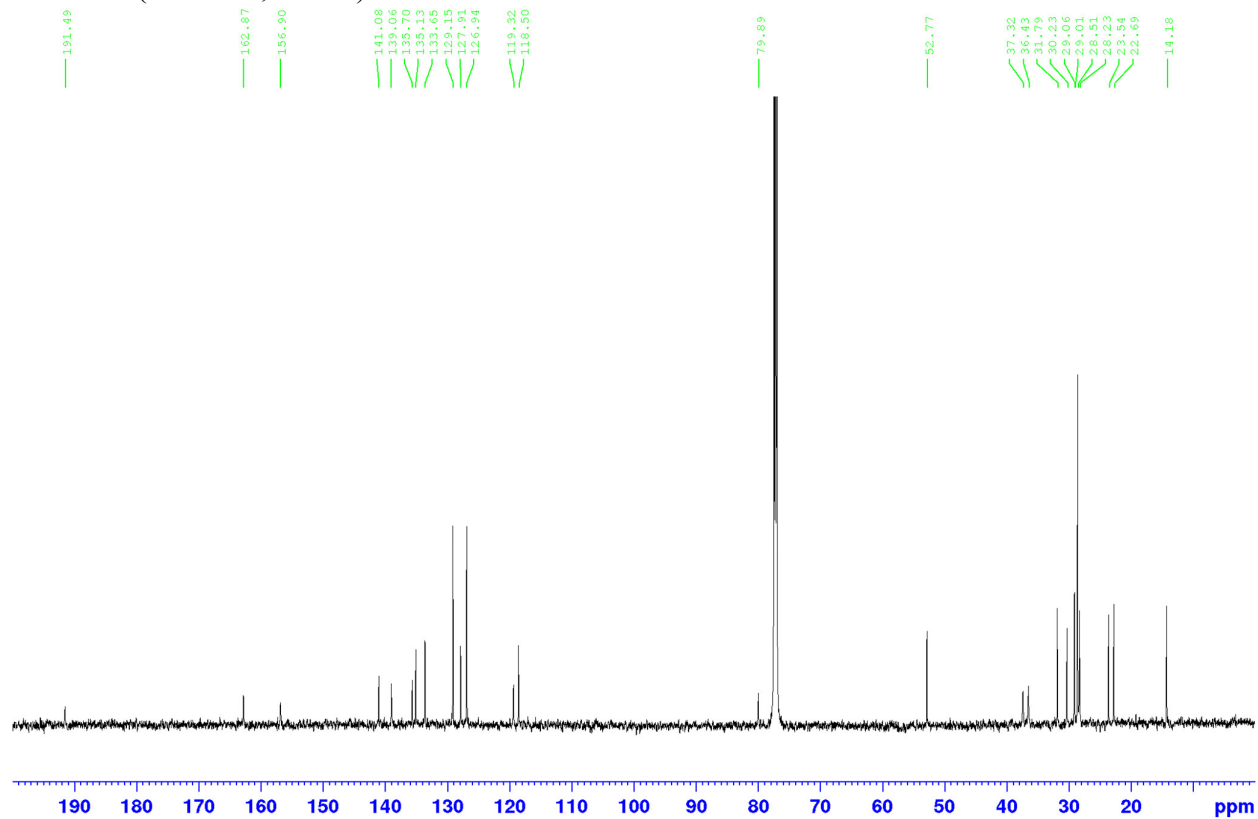

*tert*-Butyl (3-(2-(4'-fluoro-4-(octylsulfonamido)-[1,1'-biphenyl]-3-yl)-2-oxoacetamido)propyl) carbamate (**18b**)

$^1\text{H}$  NMR (400 MHz,  $\text{CDCl}_3$ ):

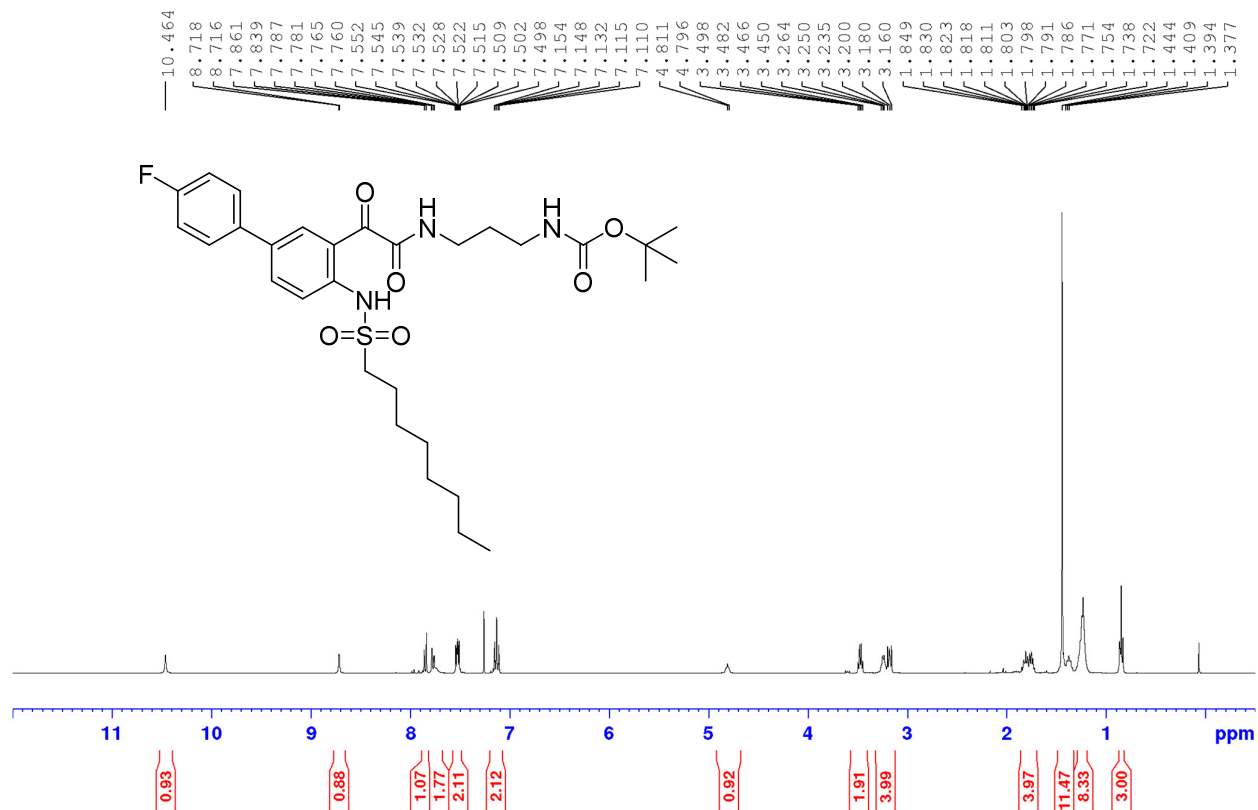

$^{13}\text{C}$  NMR (100 MHz,  $\text{CDCl}_3$ ):

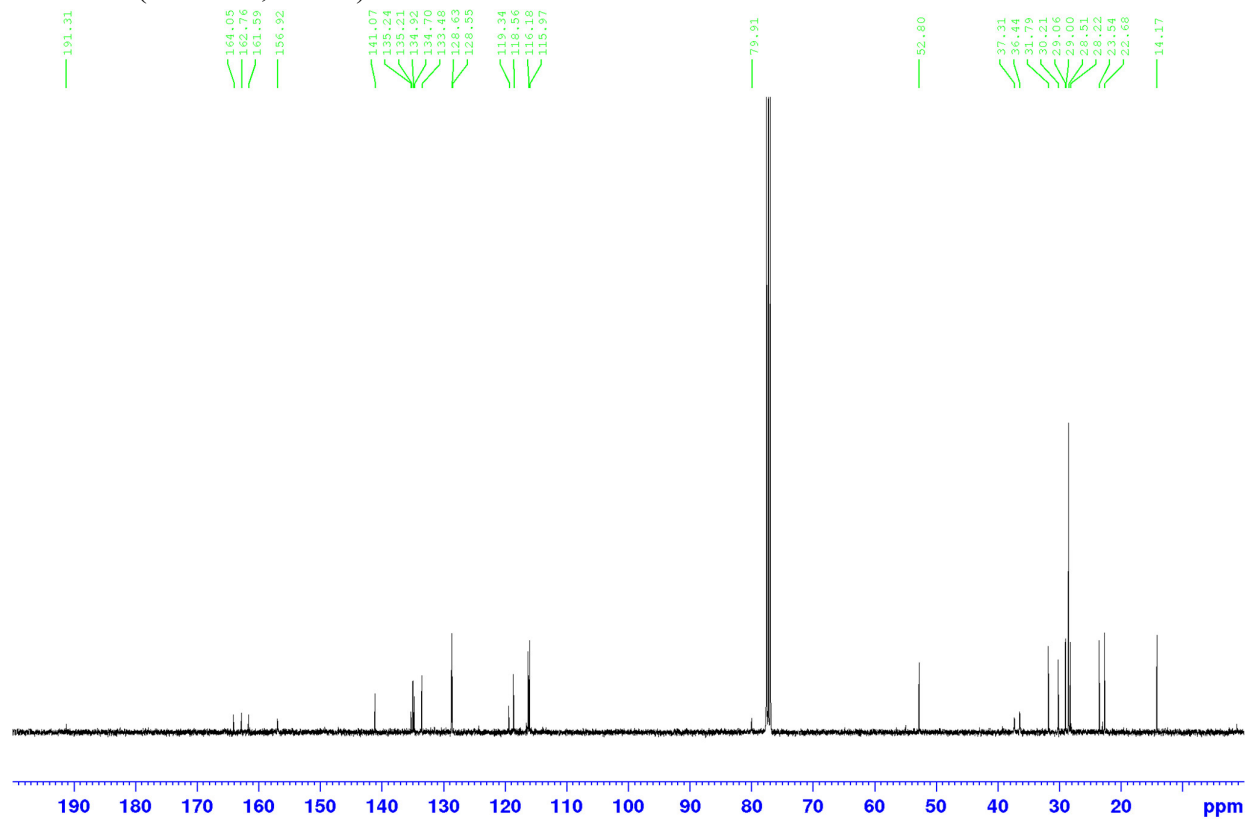

*tert*-Butyl (3-(2-(4'-Chloro-4-(octylsulfonamido)-[1,1'-biphenyl]-3-yl)-2-oxoacetamido)propyl) carbamate (**18c**)

<sup>1</sup>H NMR (600 MHz, CDCl<sub>3</sub>):

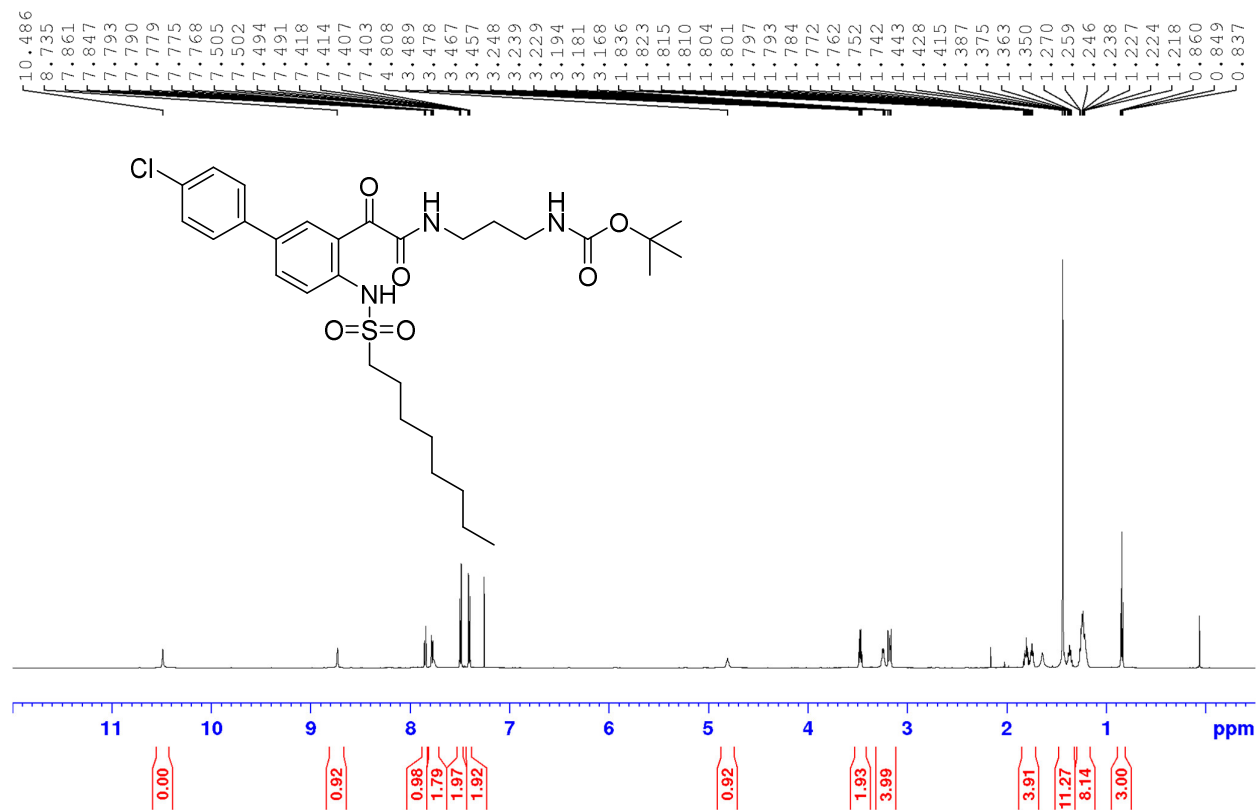

<sup>13</sup>C NMR (150 MHz, CDCl<sub>3</sub>):

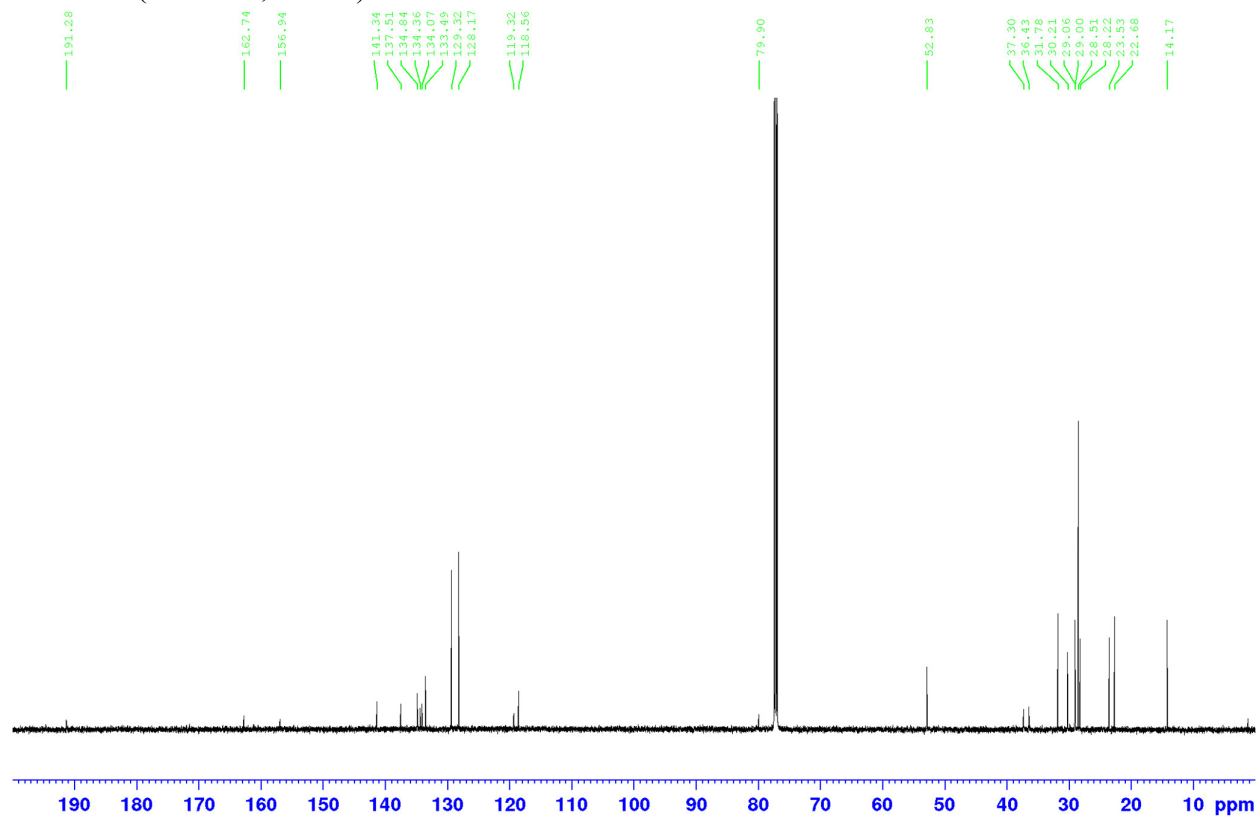

*tert*-Butyl (3-(2-(5-(naphthalen-2-yl)-2-(octylsulfonamido)phenyl)-2-oxoacetamido)propyl) carbamate (18d)

<sup>1</sup>H NMR (600 MHz, CDCl<sub>3</sub>):

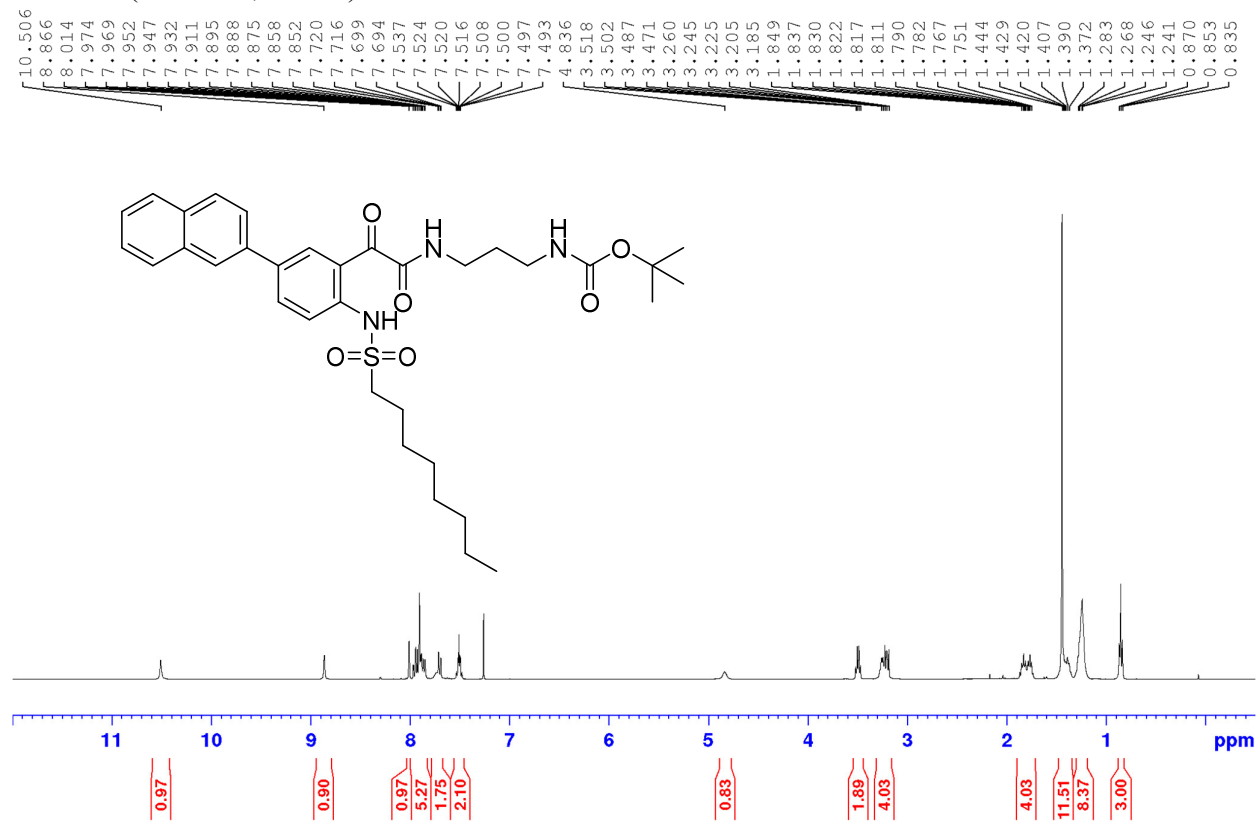

<sup>13</sup>C NMR (150 MHz, CDCl<sub>3</sub>):

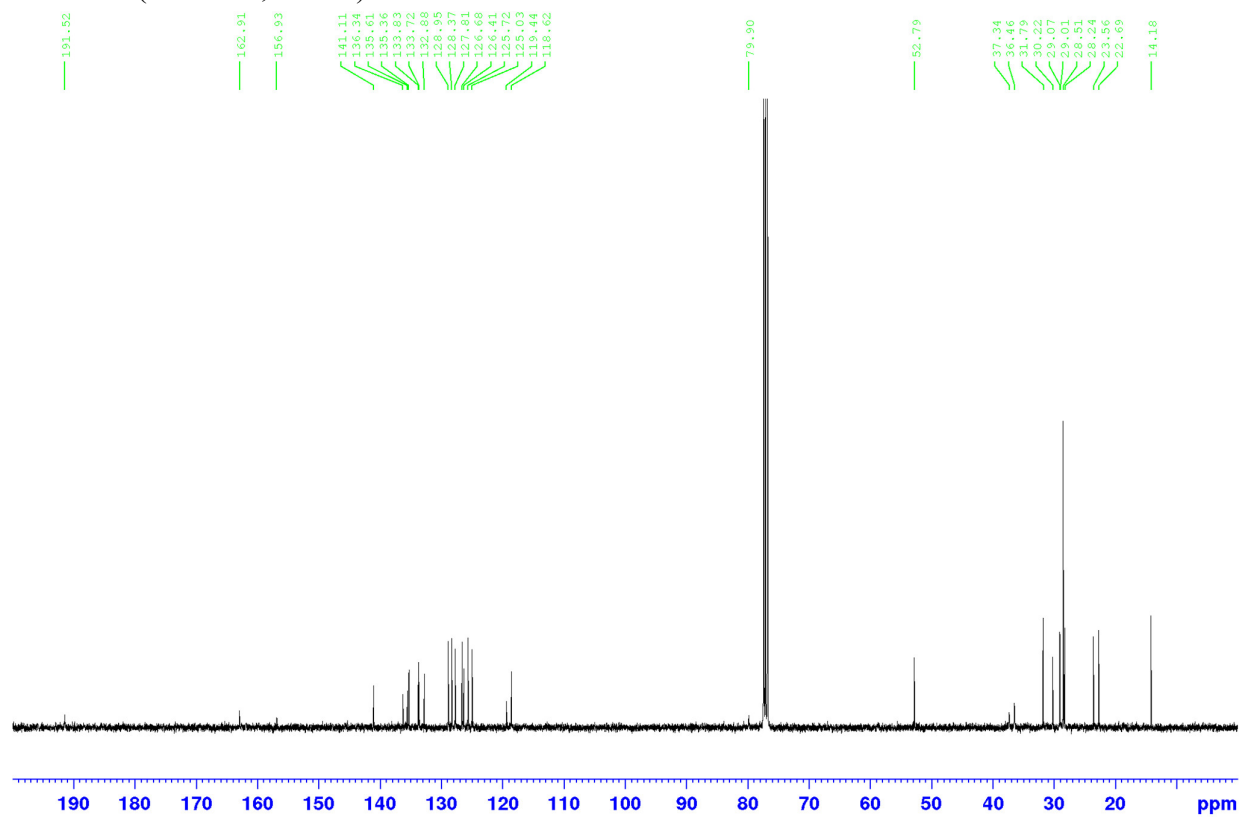

*N*-(3-Aminopropyl)-2-(4-(octylsulfonamido)-[1,1'-biphenyl]-3-yl)-2-oxoacetamide hydrochloride (**19a**)

<sup>1</sup>H NMR (400 MHz, DMSO-*d*<sub>6</sub>):

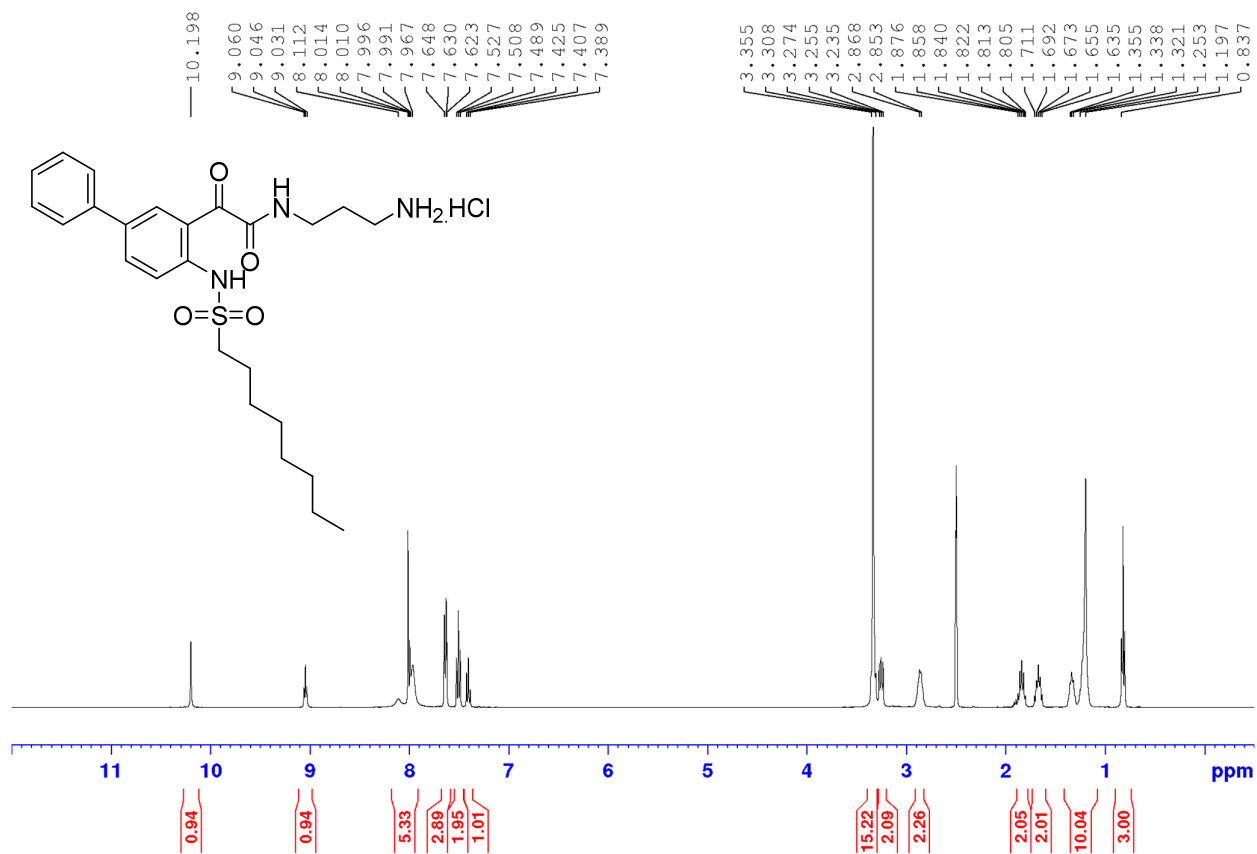

<sup>13</sup>C NMR (100 MHz, DMSO-*d*<sub>6</sub>):

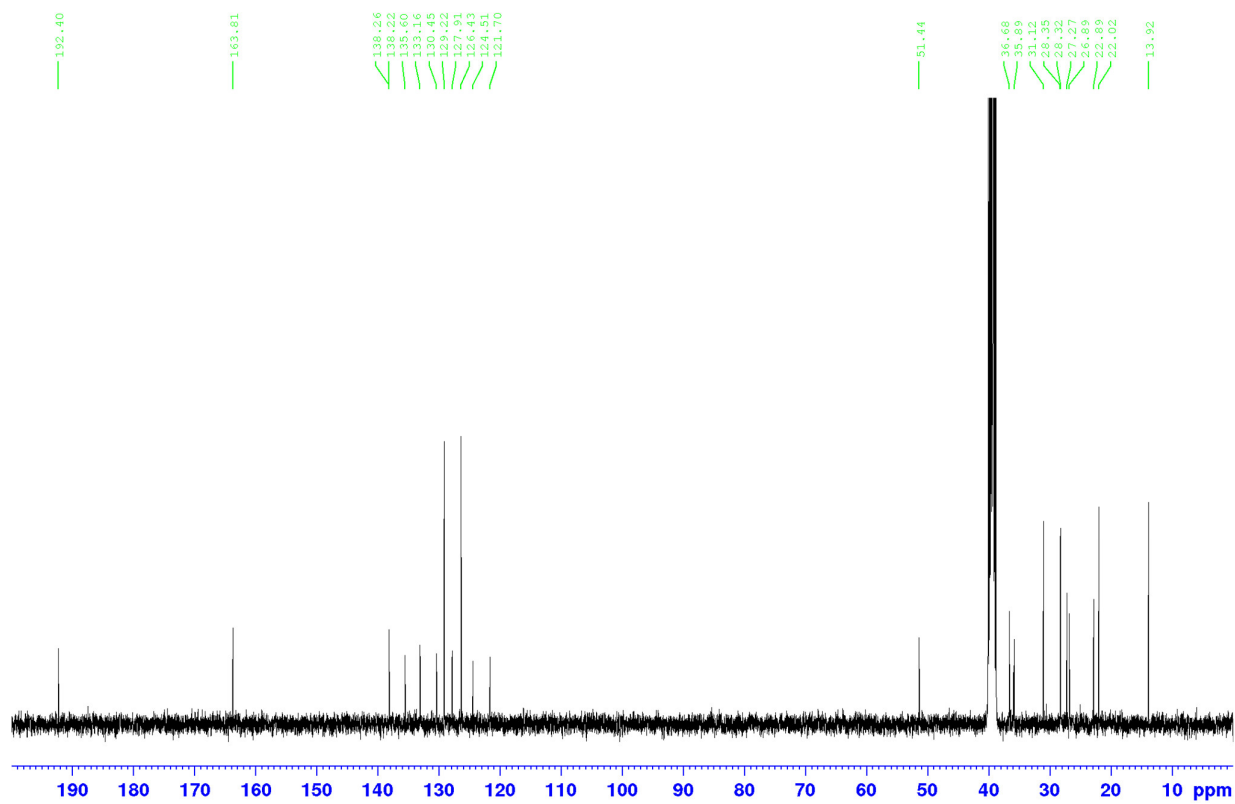

*N*-(3-Aminopropyl)-2-(4'-fluoro-4-(octylsulfonamido)-[1,1'-biphenyl]-3-yl)-2-oxoacetamide hydrochloride (**19b**)

<sup>1</sup>H NMR (400 MHz, DMSO-*d*<sub>6</sub>):

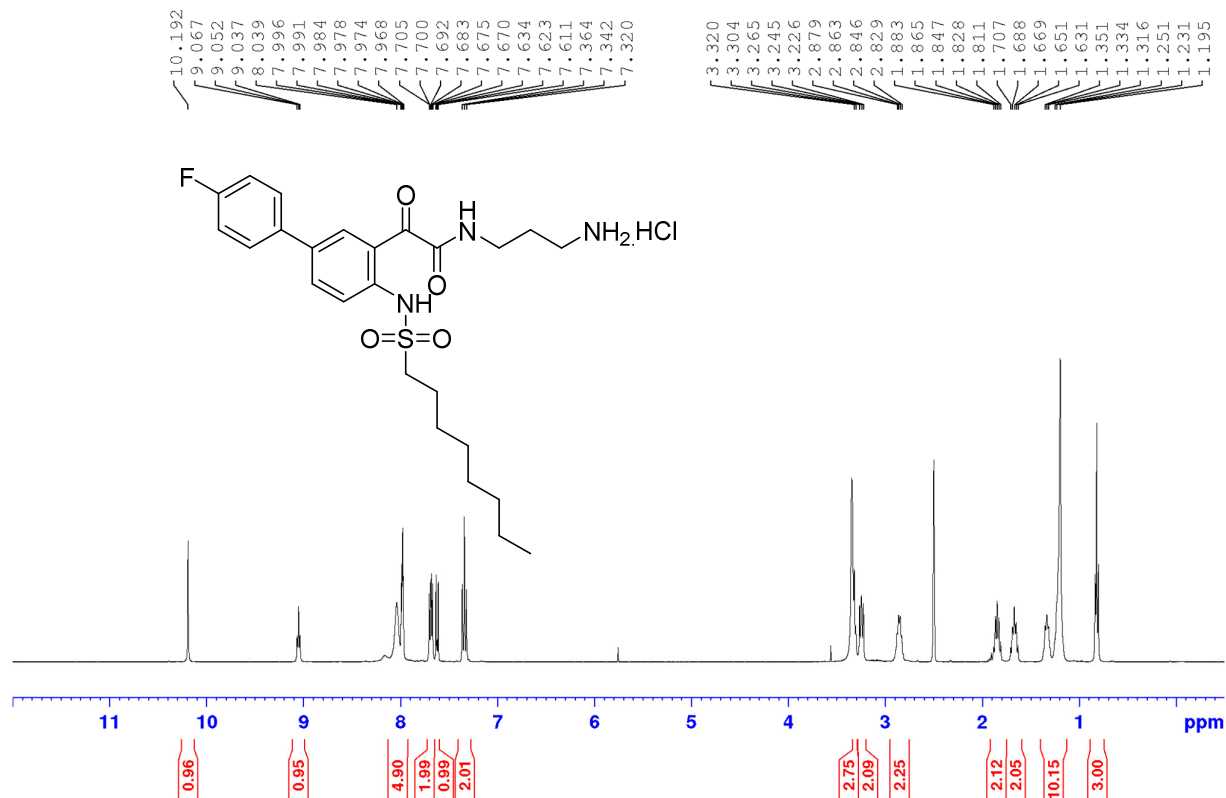

<sup>13</sup>C NMR (100 MHz, DMSO-*d*<sub>6</sub>):

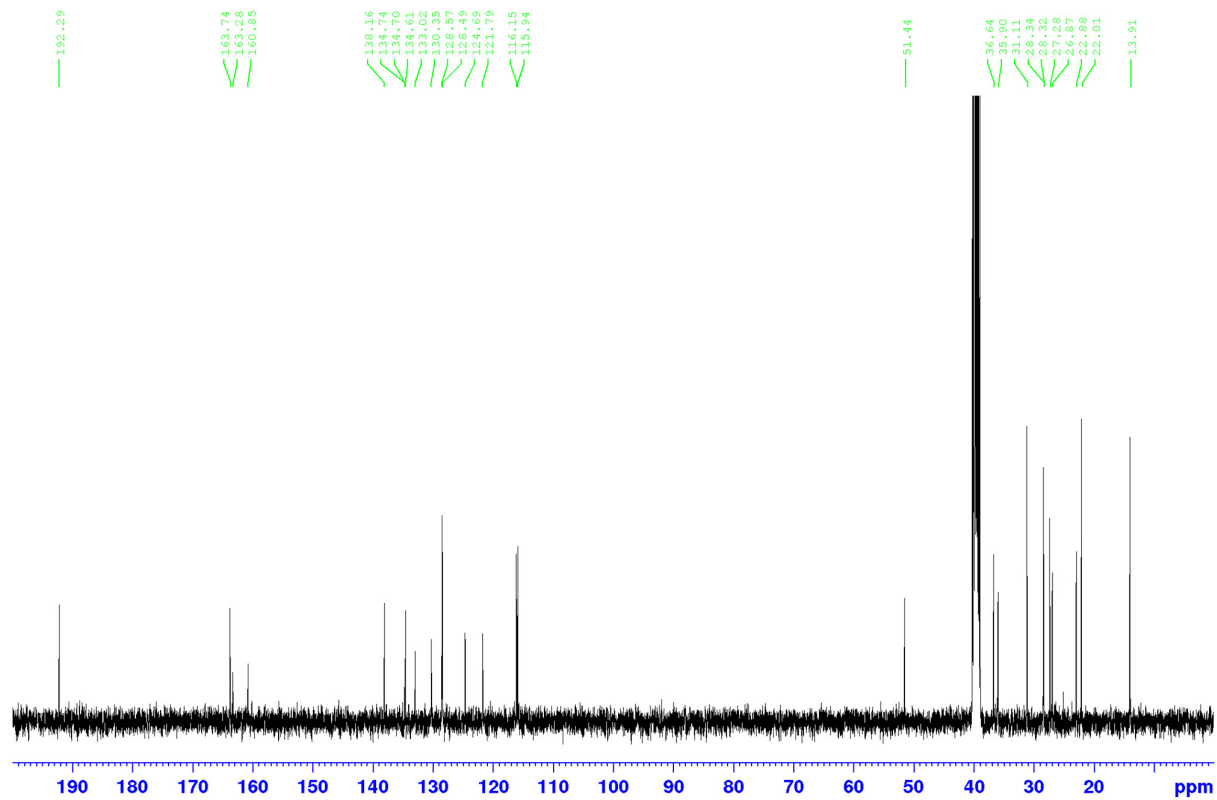

*N*-(3-Aminopropyl)-2-(4'-chloro-4-(octylsulfonamido)-[1,1'-biphenyl]-3-yl)-2-oxoacetamide hydrochloride (**19c**)

$^1\text{H}$  NMR (400 MHz,  $\text{DMSO-}d_6$ ):

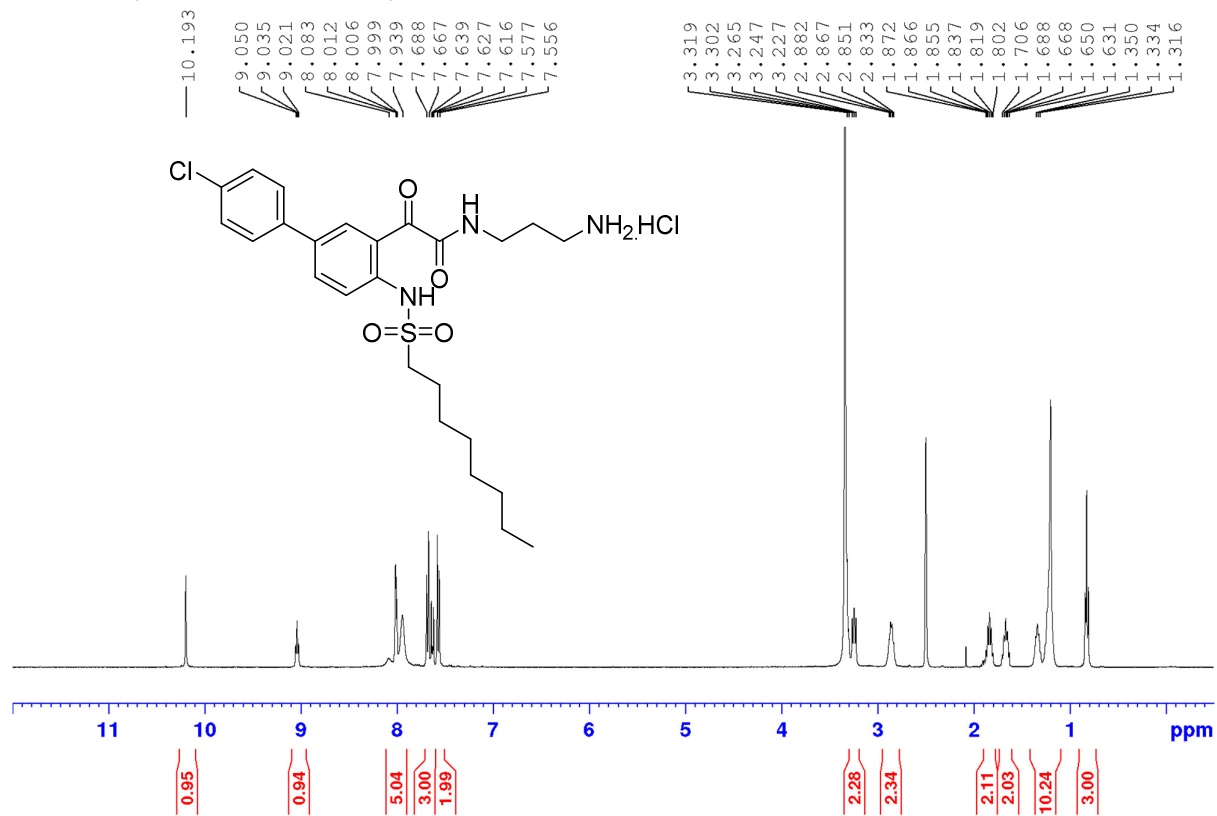

$^{13}\text{C}$  NMR (100 MHz,  $\text{DMSO-}d_6$ ):

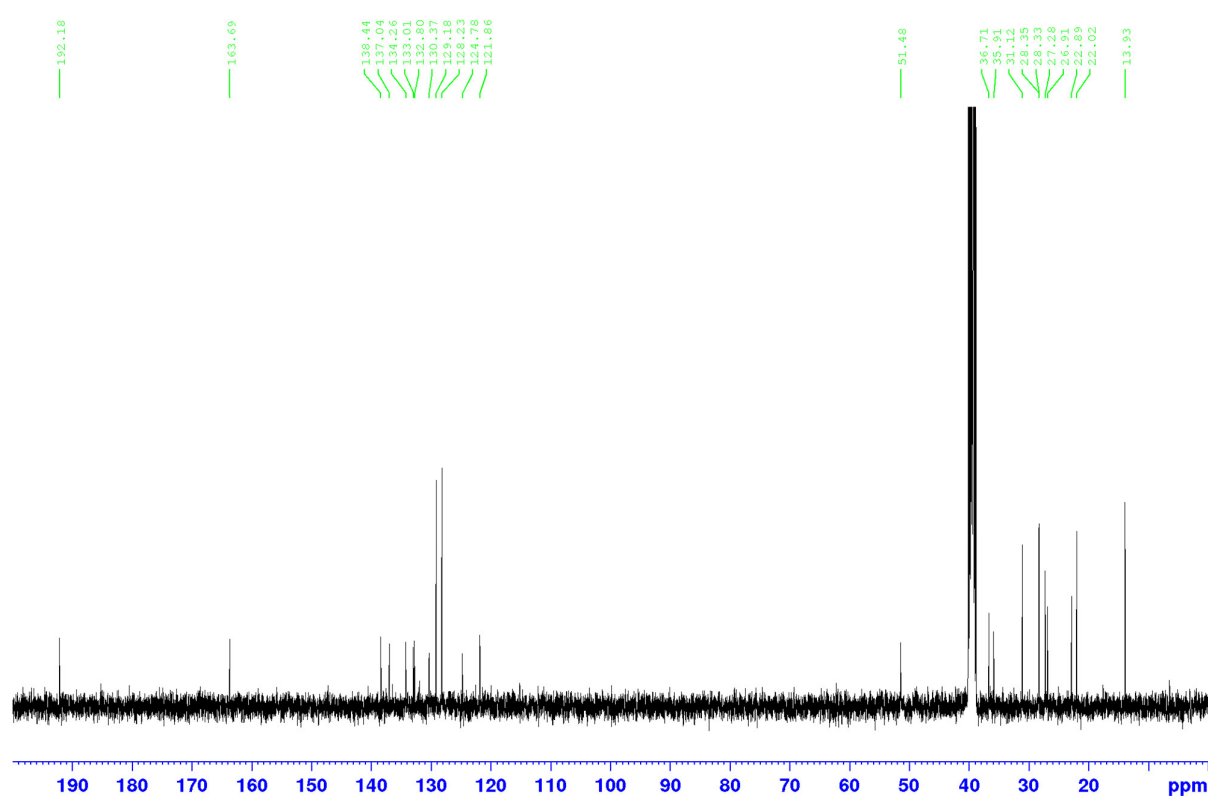



*N*-(3-Aminopropyl)-2-(5-(naphthalen-2-yl)-2-(octylsulfonamido)phenyl)-2-oxoacetamide hydrochloride (**19d**)

<sup>1</sup>H NMR (400 MHz, DMSO-*d*<sub>6</sub>):

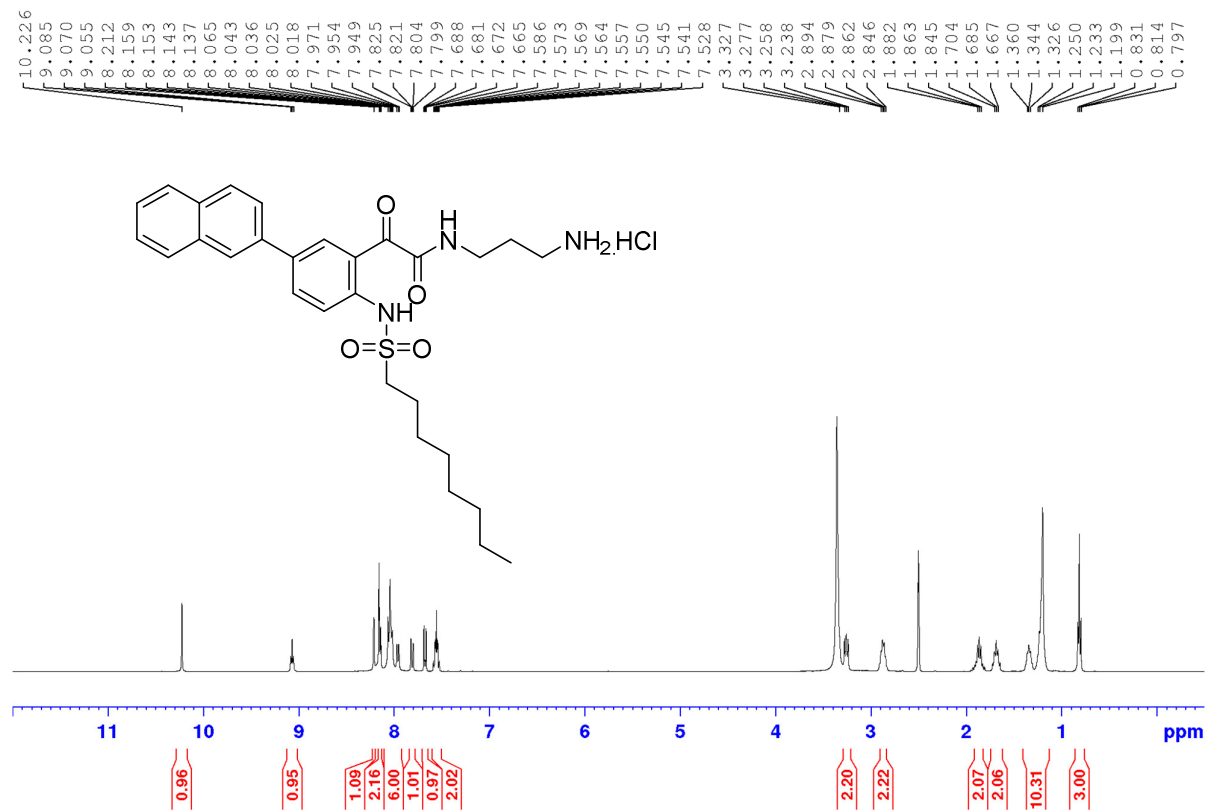

<sup>13</sup>C NMR (100 MHz, DMSO-*d*<sub>6</sub>):

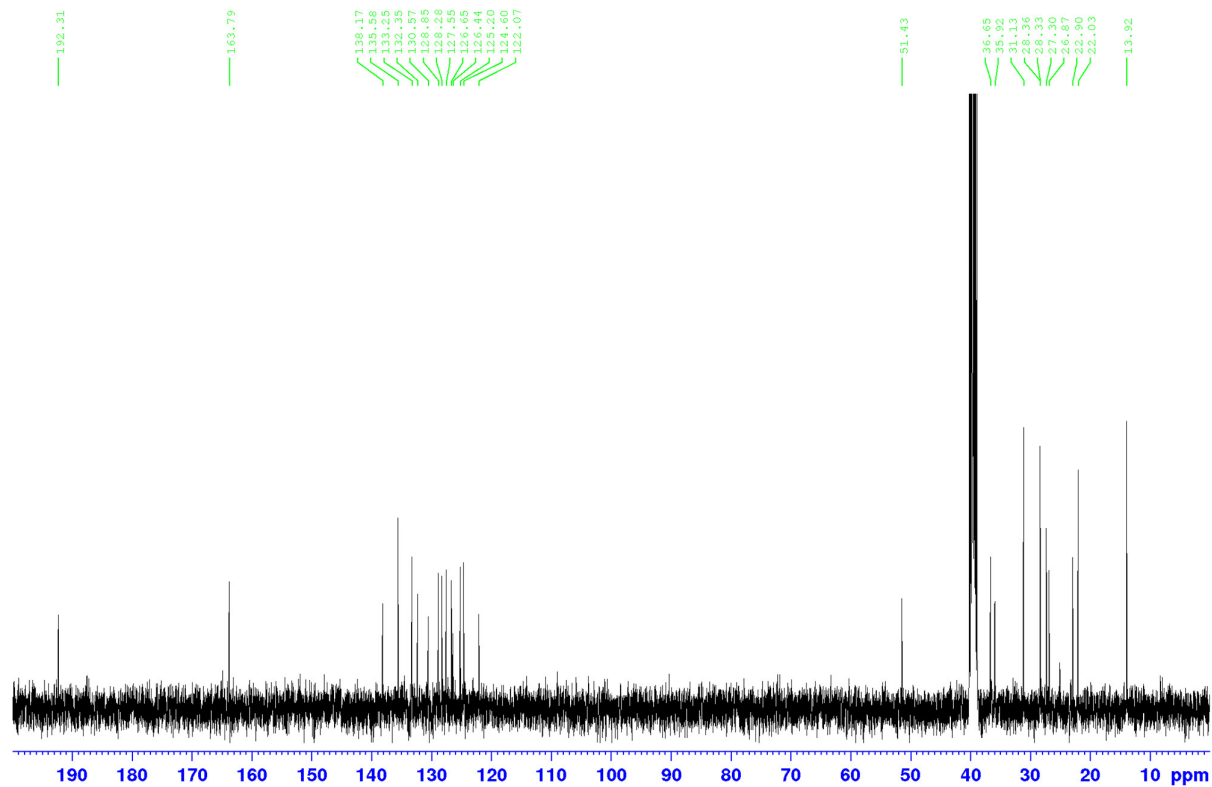

(*E*)-1-*tert*-Butyl-*N*-(*N'*-((*tert*-butyloxidanyl)carbonyl)-*N*-(3-(2-(4-(octylsulfonamido)-[1,1'-biphenyl]-3-yl)-2-oxoacetamido)propyl)carbamimidoyl)-1-oxidanecarboxamide (**21a**)

$^1\text{H}$  NMR (400 MHz,  $\text{CDCl}_3$ ):

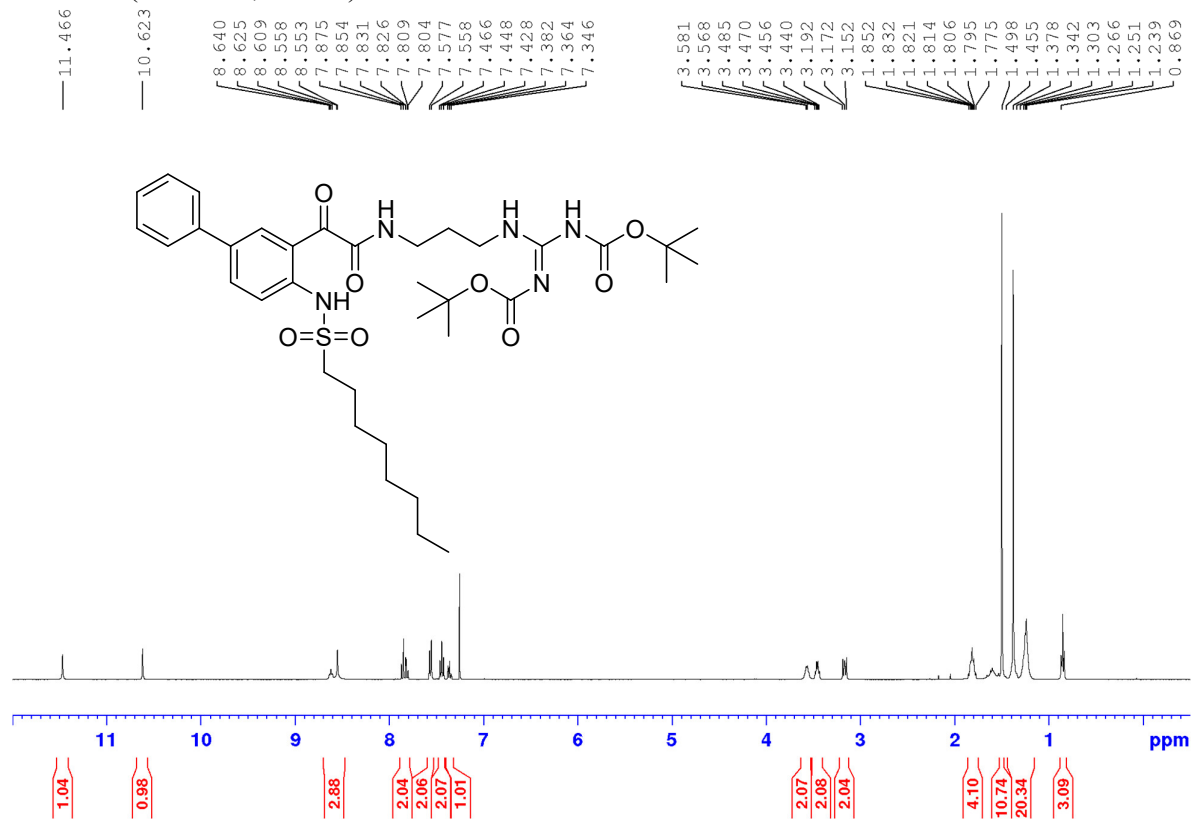

$^{13}\text{C}$  NMR (150 MHz,  $\text{CDCl}_3$ ):

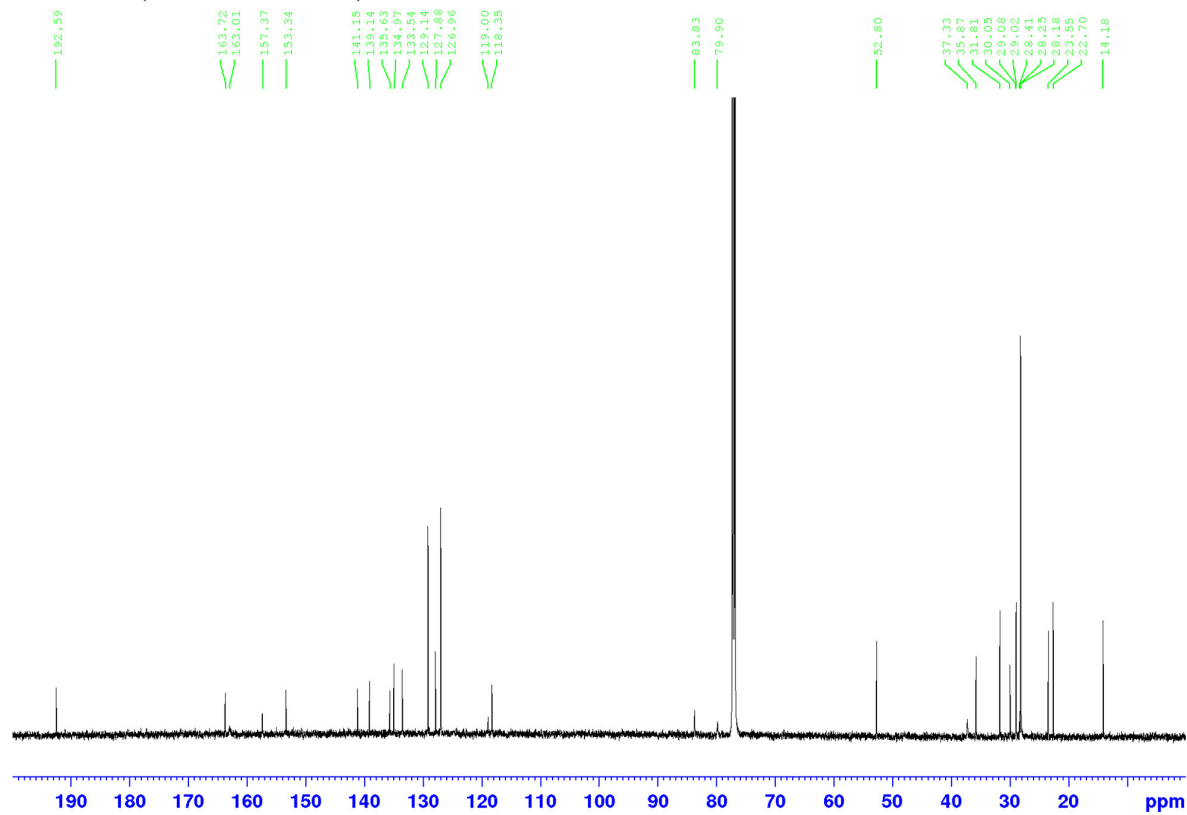

(*E*)-1-*tert*-Butyl-*N*-(*N'*-((*tert*-butyloxidanyl)carbonyl)-*N*-(3-(2-(4'-fluoro-4-(octylsulfonamido)-[1,1'-biphenyl]-3-yl)-2-oxoacetamido)propyl)carbamidoyl)-1-oxidanecarboxamide (**21b**)

$^1\text{H}$  NMR (400 MHz,  $\text{CDCl}_3$ ):

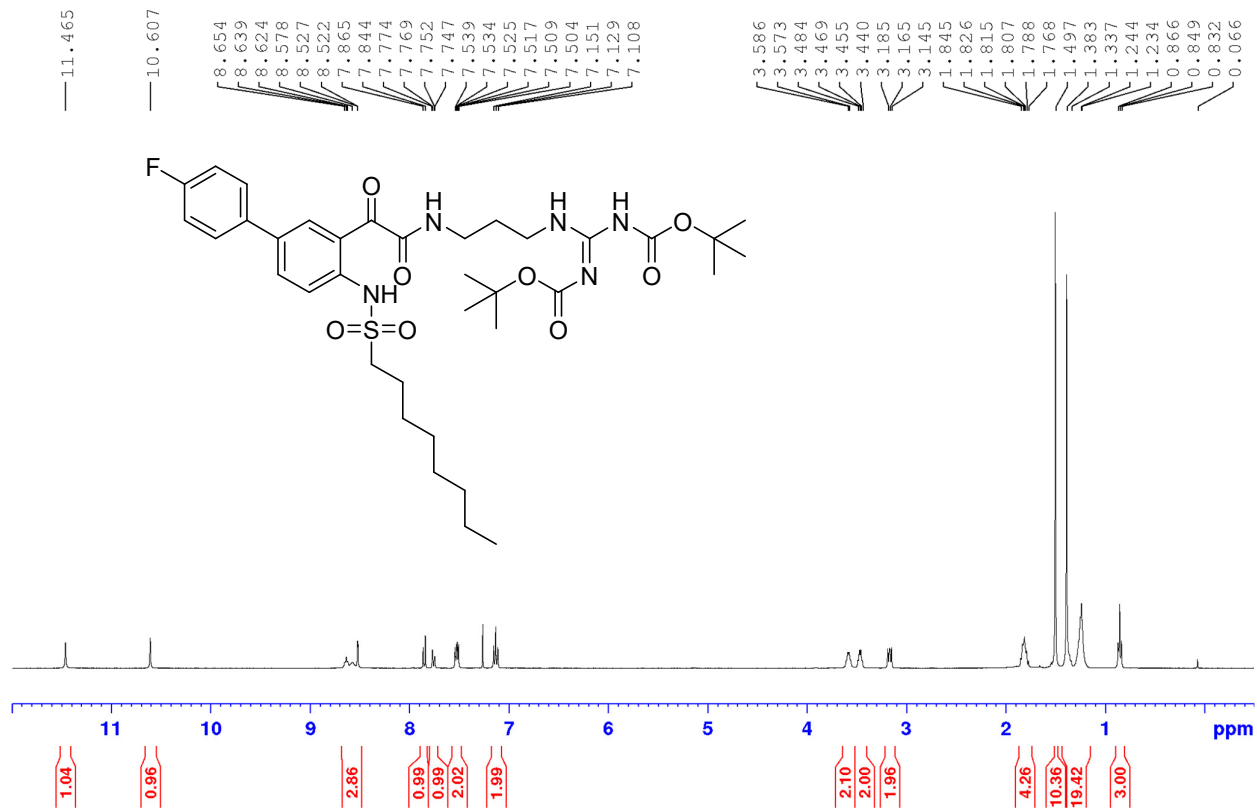

$^{13}\text{C}$  NMR (100 MHz,  $\text{CDCl}_3$ ):

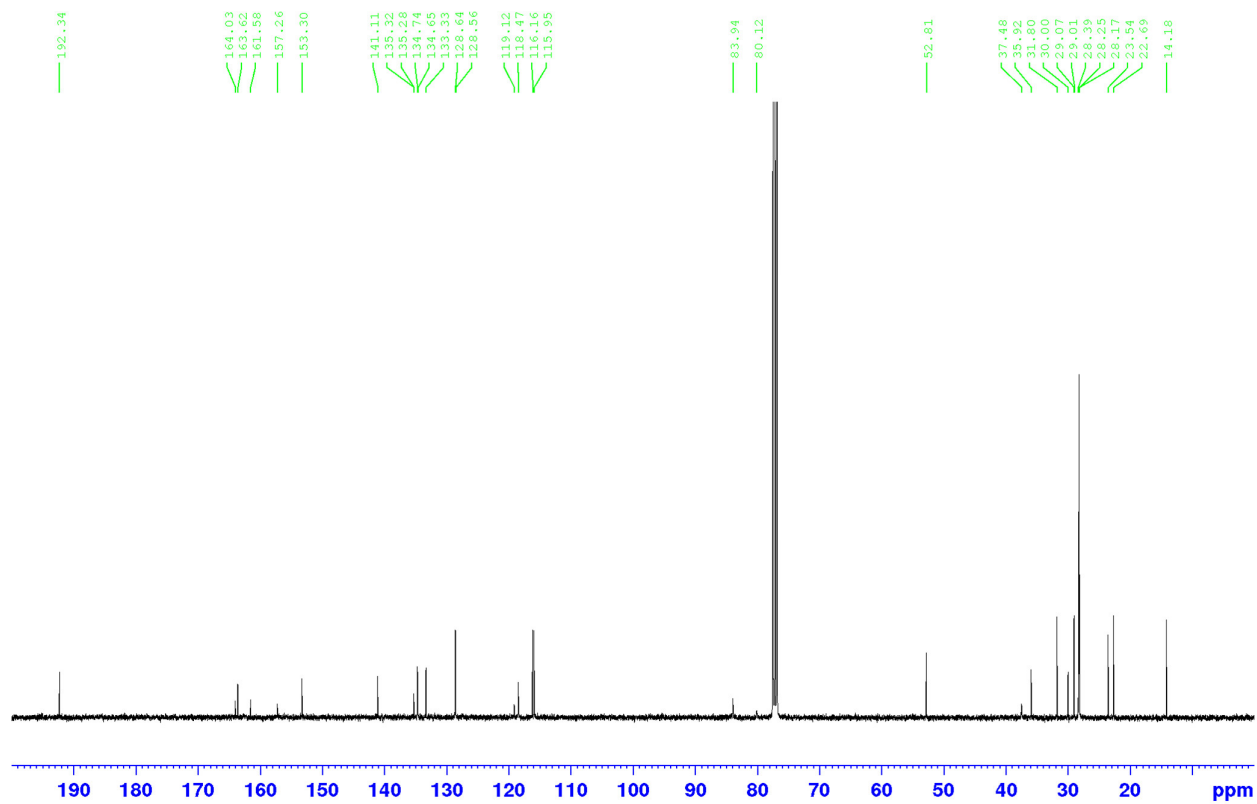

(*E*)-1-*tert*-Butyl-*N*-(*N'*-((*tert*-butyloxidanyl)carbonyl)-*N*-(3-(2-(4'-chloro-4-(octylsulfonamido)-[1,1'-biphenyl]-3-yl)-2-oxoacetamido)propyl)carbamimidoyl)-1-oxidanecarboxamide (**21c**)

$^1\text{H}$  NMR (400 MHz,  $\text{CDCl}_3$ ):

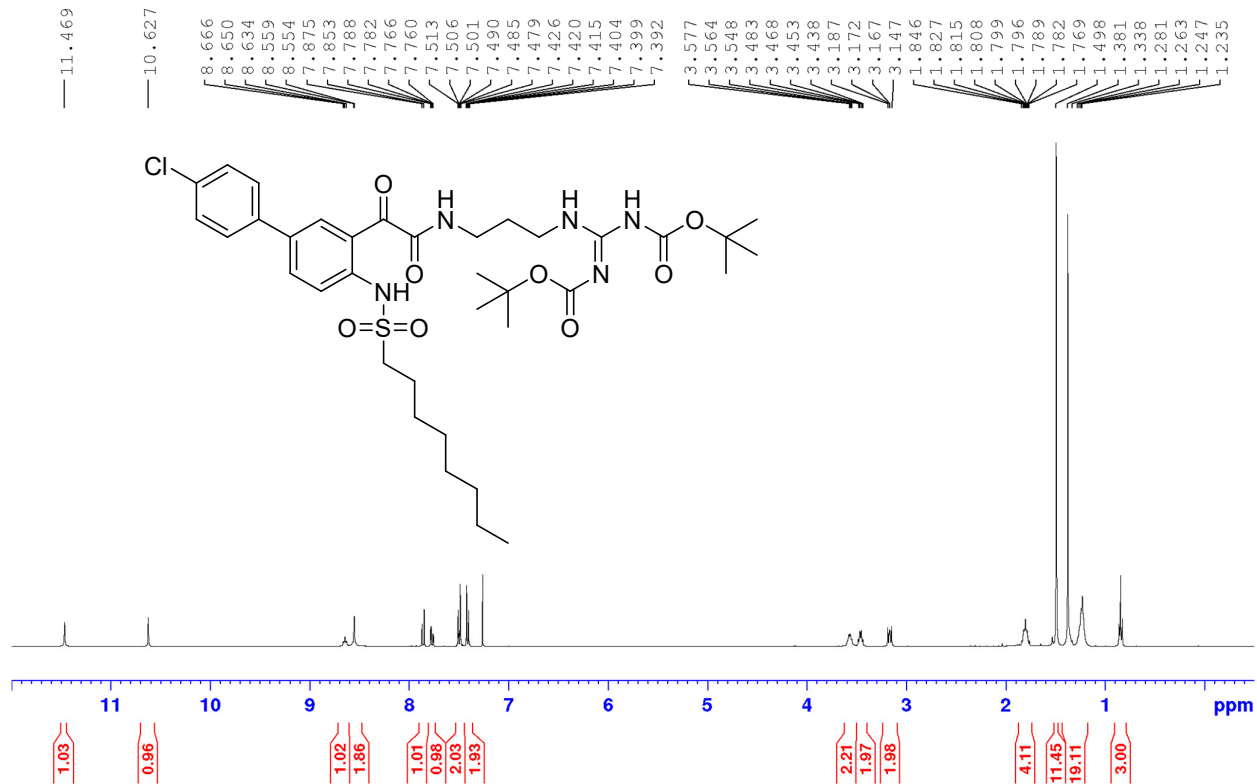

$^{13}\text{C}$  NMR (150 MHz,  $\text{CDCl}_3$ ):

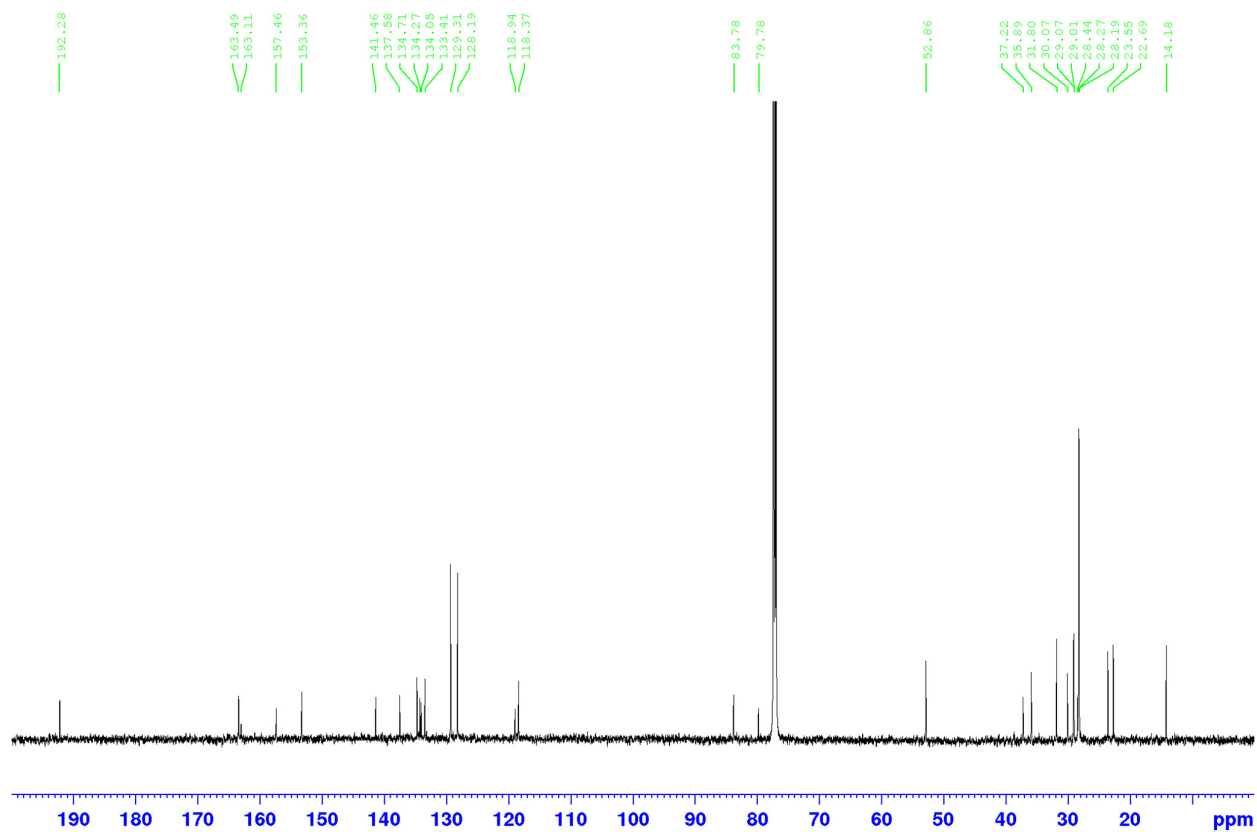

(*E*)-1-*tert*-Butyl-*N*-(*N'*-((*tert*-butyloxidanyl)carbonyl)-*N*-(3-(2-(5-(naphthalen-2-yl)-2-(octylsulfonamido)phenyl)-2-oxoacetamido)propyl)carbamimidoyl)-1-oxidanecarboxamide (**21d**)

$^1\text{H}$  NMR (400 MHz,  $\text{CDCl}_3$ ):

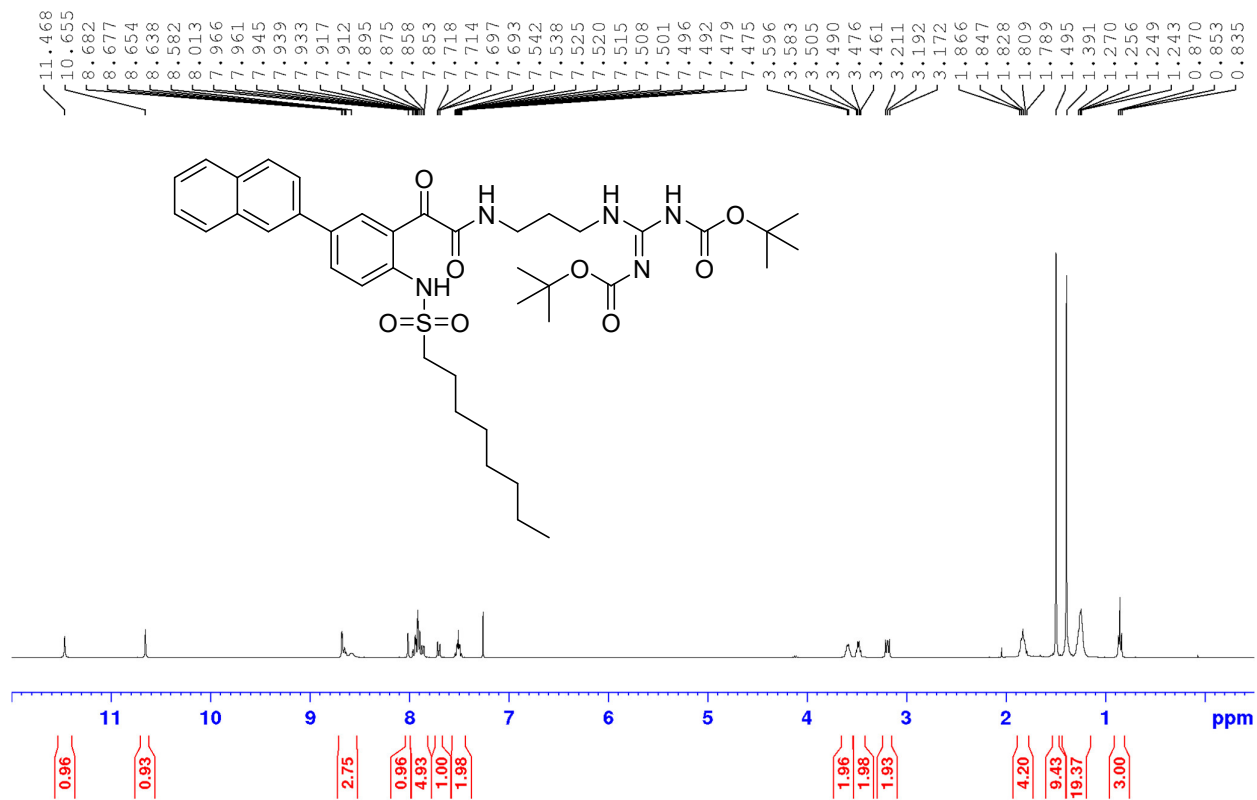

$^{13}\text{C}$  NMR (100 MHz,  $\text{CDCl}_3$ ):

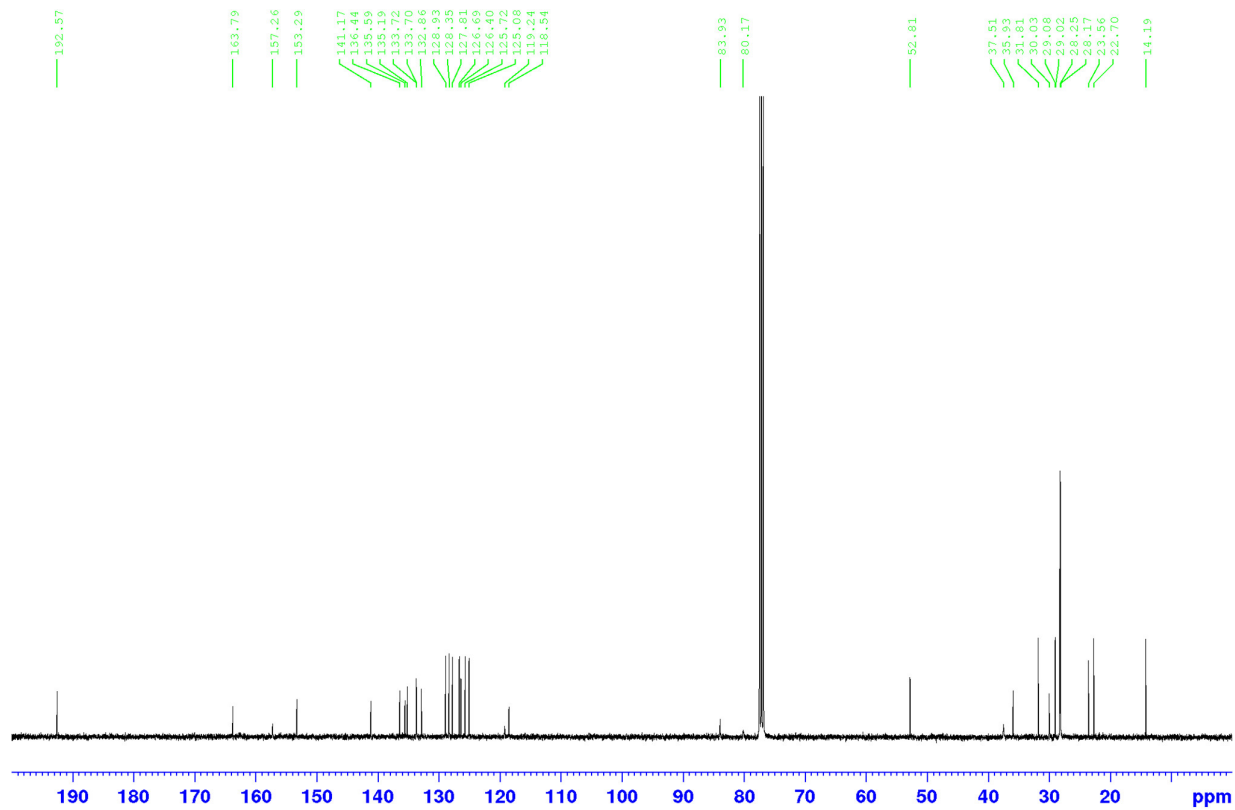

*N*-(3-Guanidinopropyl)-2-(4-(octylsulfonamido)-[1,1'-biphenyl]-3-yl)-2-oxoacetamide hydrochloride (**22a**)

<sup>1</sup>H NMR (600 MHz, DMSO-*d*<sub>6</sub>):

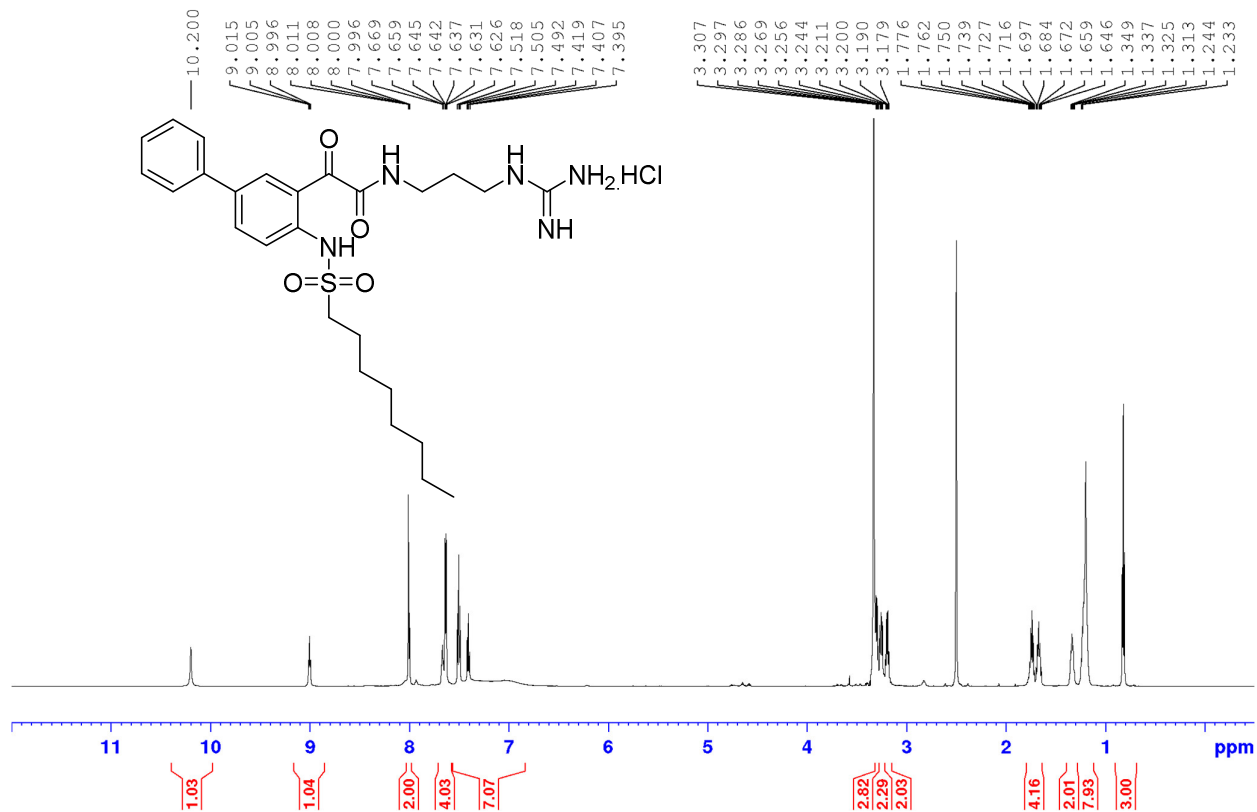

<sup>13</sup>C NMR (150 MHz, DMSO-*d*<sub>6</sub>):

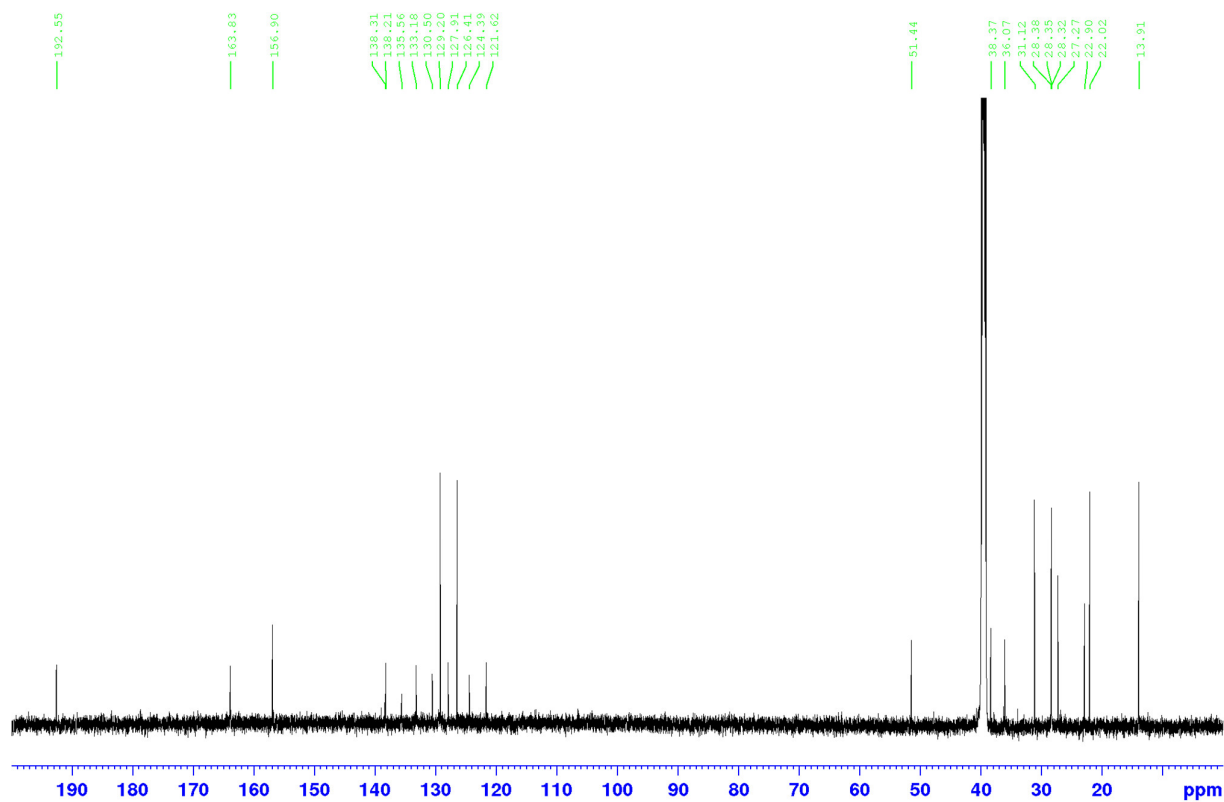

2-(4'-Fluoro-4-(octylsulfonamido)-[1,1'-biphenyl]-3-yl)-N-(3-guanidinopropyl)-2-oxoacetamide hydrochloride (**22b**)

$^1\text{H}$  NMR (600 MHz,  $\text{DMSO-}d_6$ ):

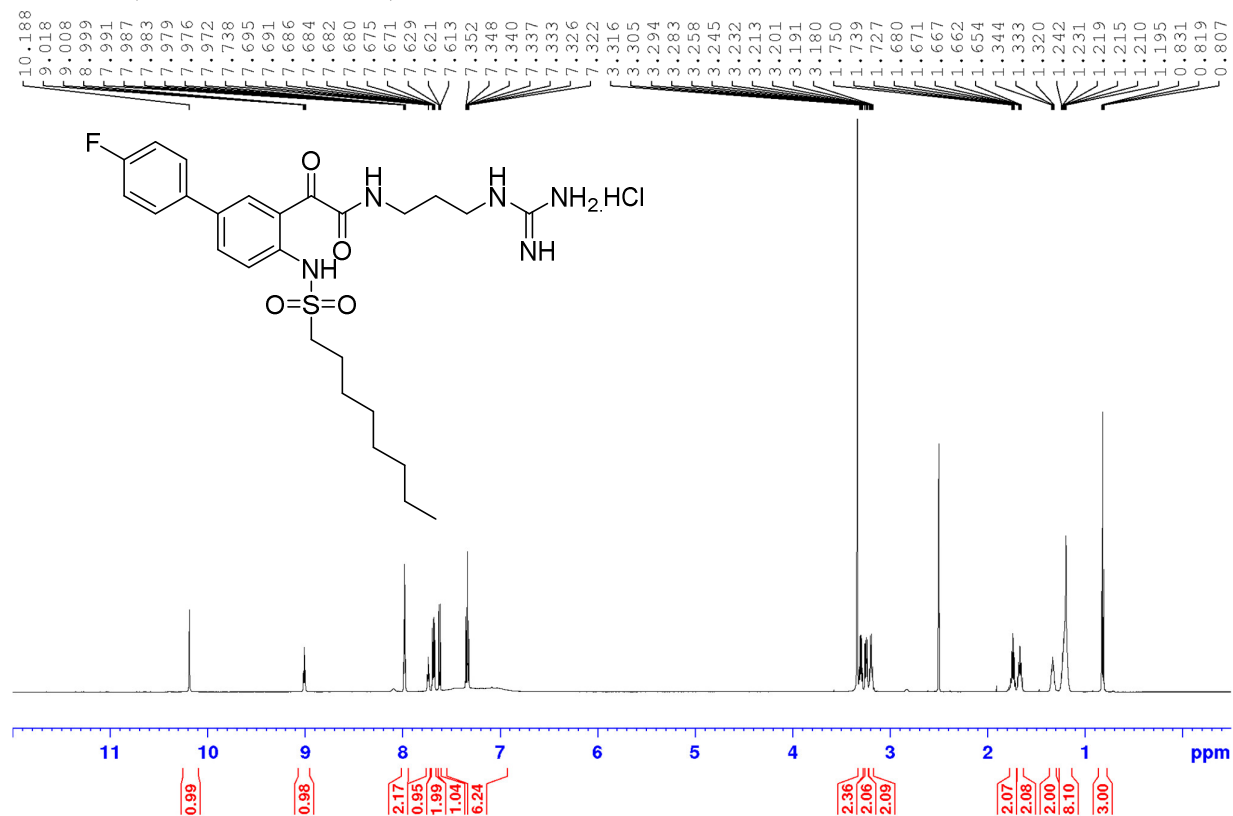

$^{13}\text{C}$  NMR (150 MHz,  $\text{DMSO-}d_6$ ):

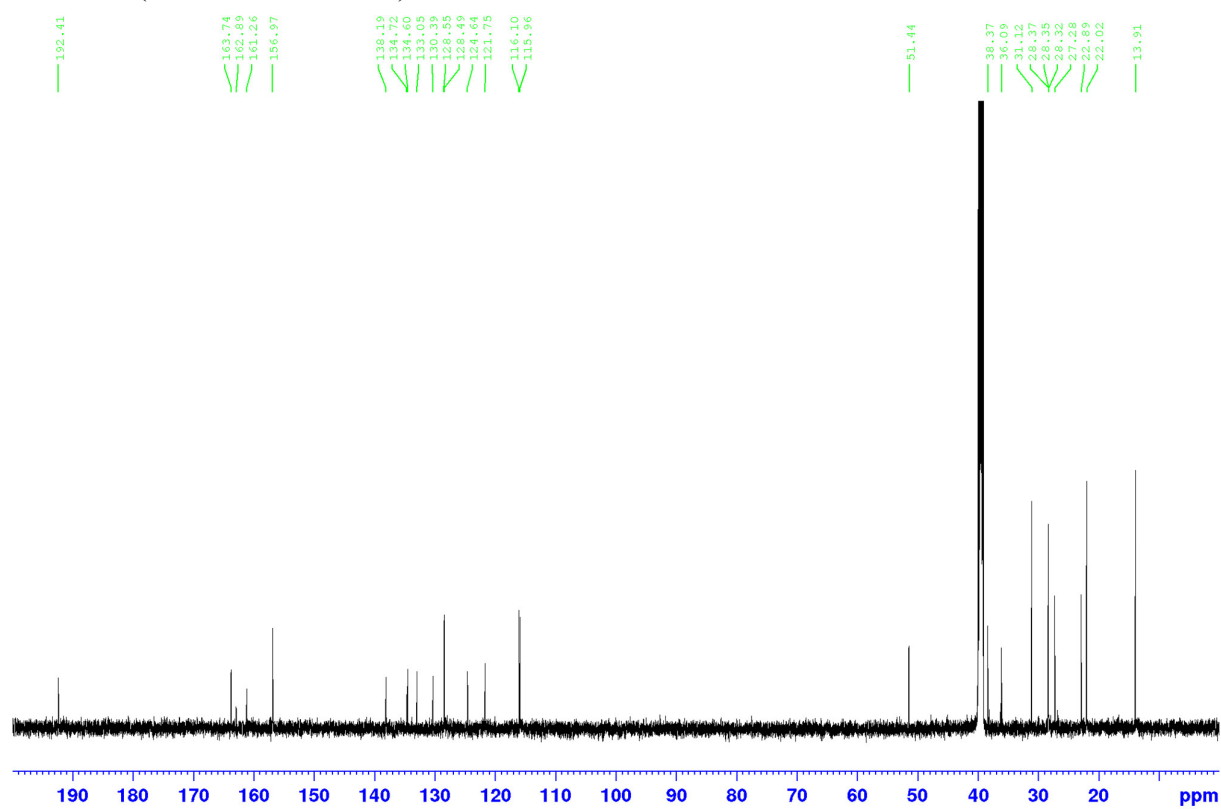

2-(4'-Chloro-4-(octylsulfonamido)-[1,1'-biphenyl]-3-yl)-*N*-(3-guanidinopropyl)-2-oxoacetamide hydrochloride (**22c**)

<sup>1</sup>H NMR (600 MHz, DMSO-*d*<sub>6</sub>):

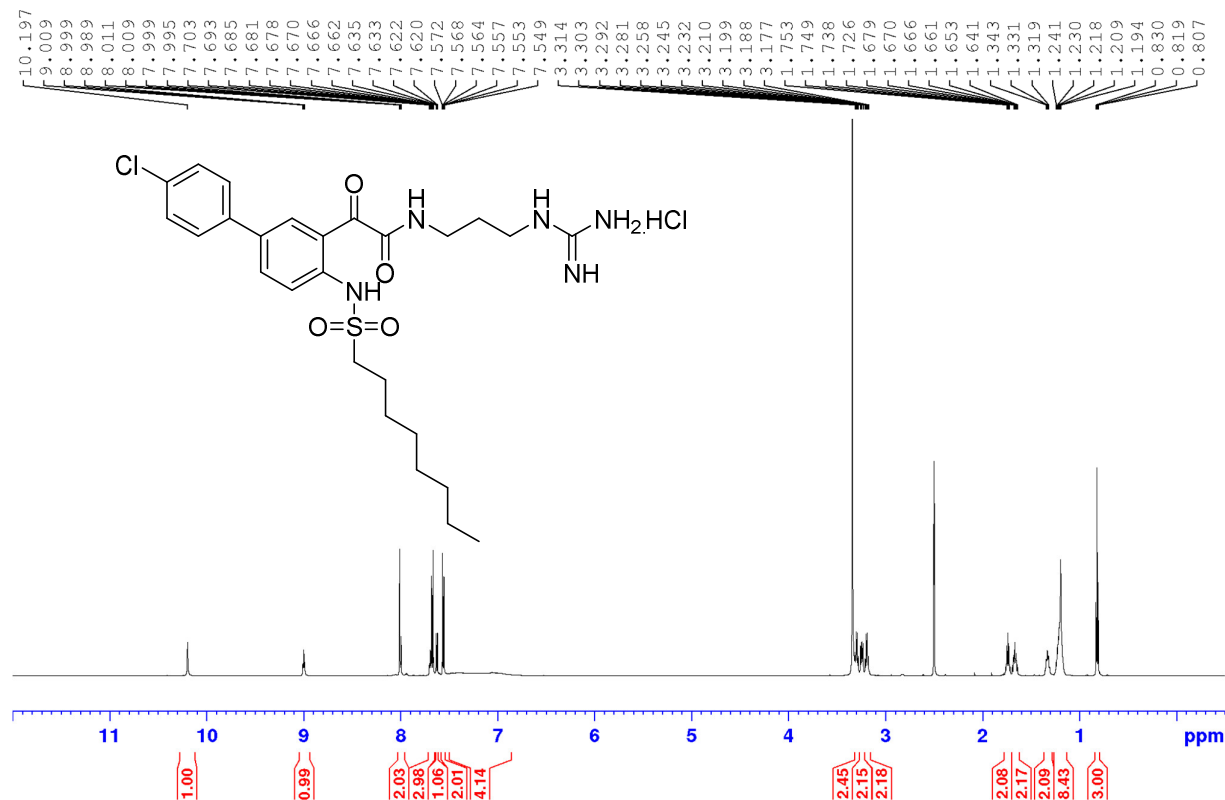

<sup>13</sup>C NMR (150 MHz, DMSO-*d*<sub>6</sub>):

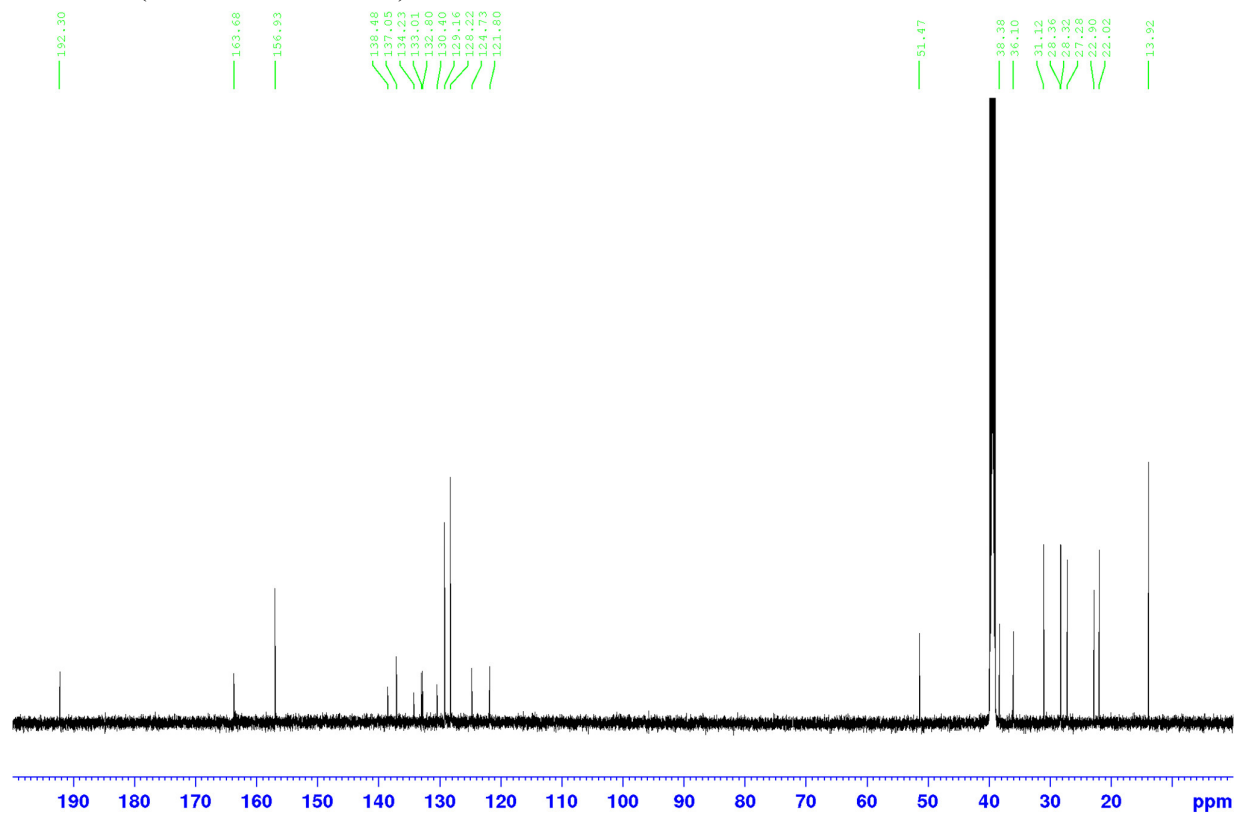



*N*-(3-Guanidinopropyl)-2-(5-(naphthalen-2-yl)-2-(octylsulfonamido)phenyl)-2-oxoacetamide hydrochloride (**22d**)

<sup>1</sup>H NMR (600 MHz, DMSO-*d*<sub>6</sub>):

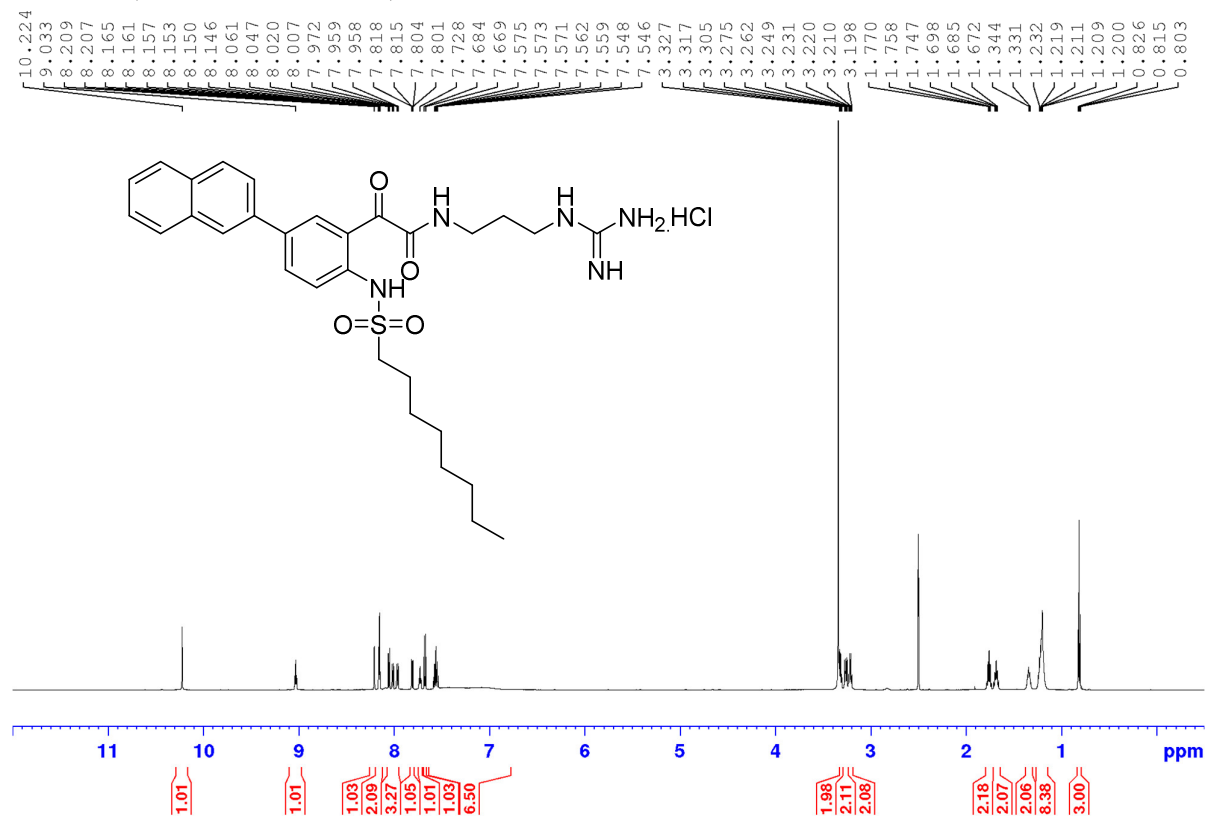

<sup>13</sup>C NMR (150 MHz, DMSO-*d*<sub>6</sub>):

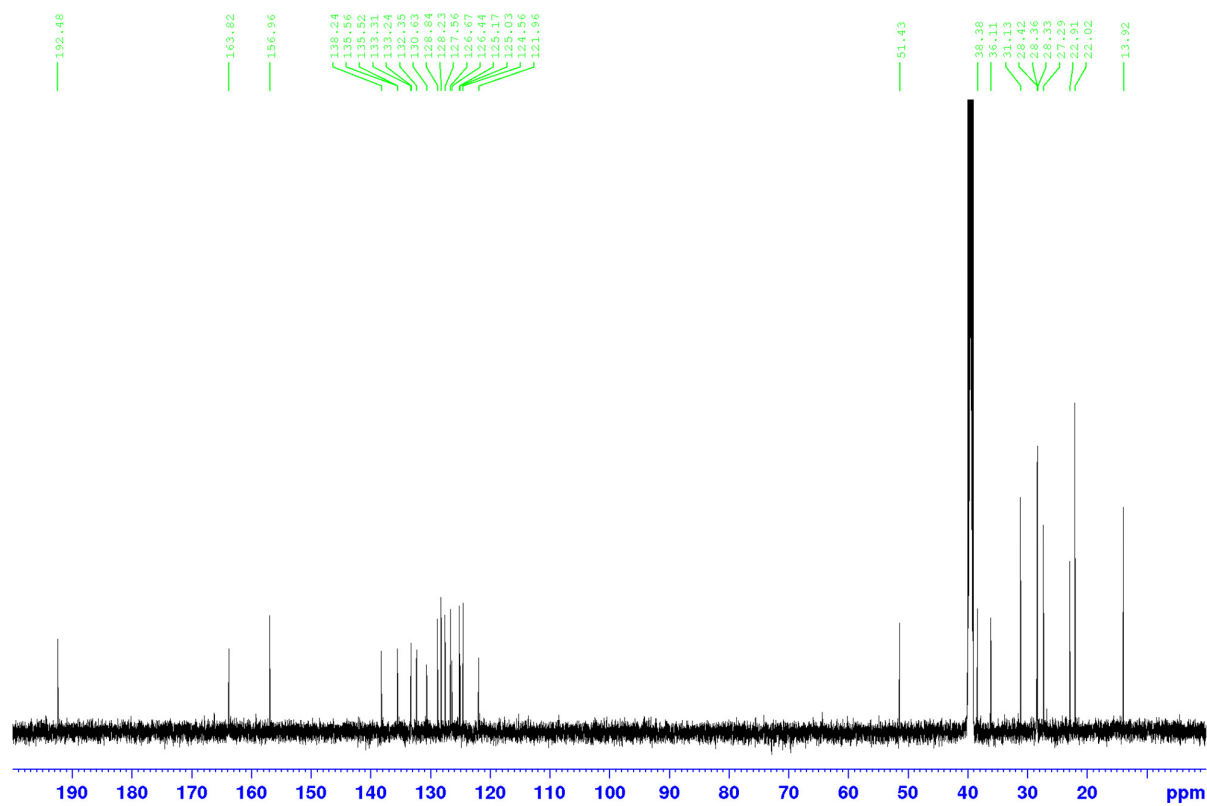

# 1-(2-Naphthoyl)-5-phenylindoline-2,3-dione (24)

<sup>1</sup>H NMR (600 MHz, DMSO-*d*<sub>6</sub>):

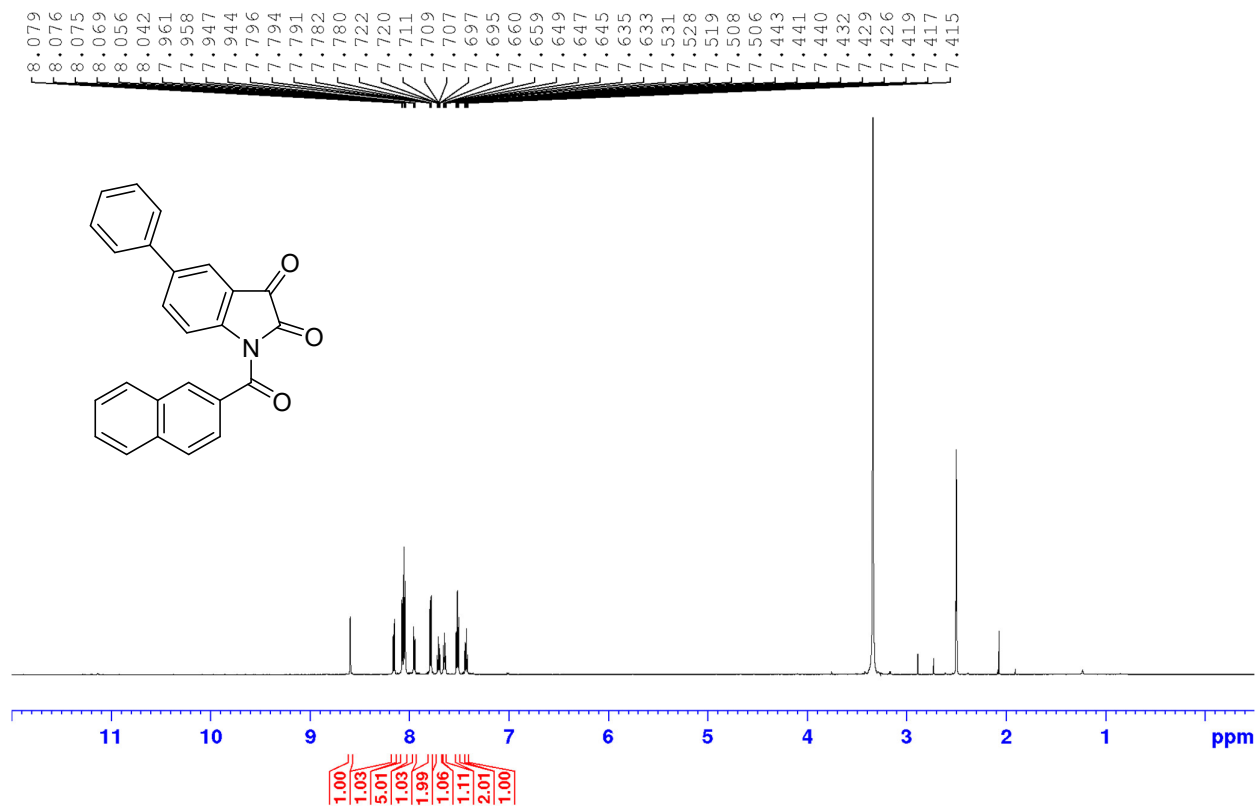

<sup>13</sup>C NMR (150 MHz, DMSO-*d*<sub>6</sub>):

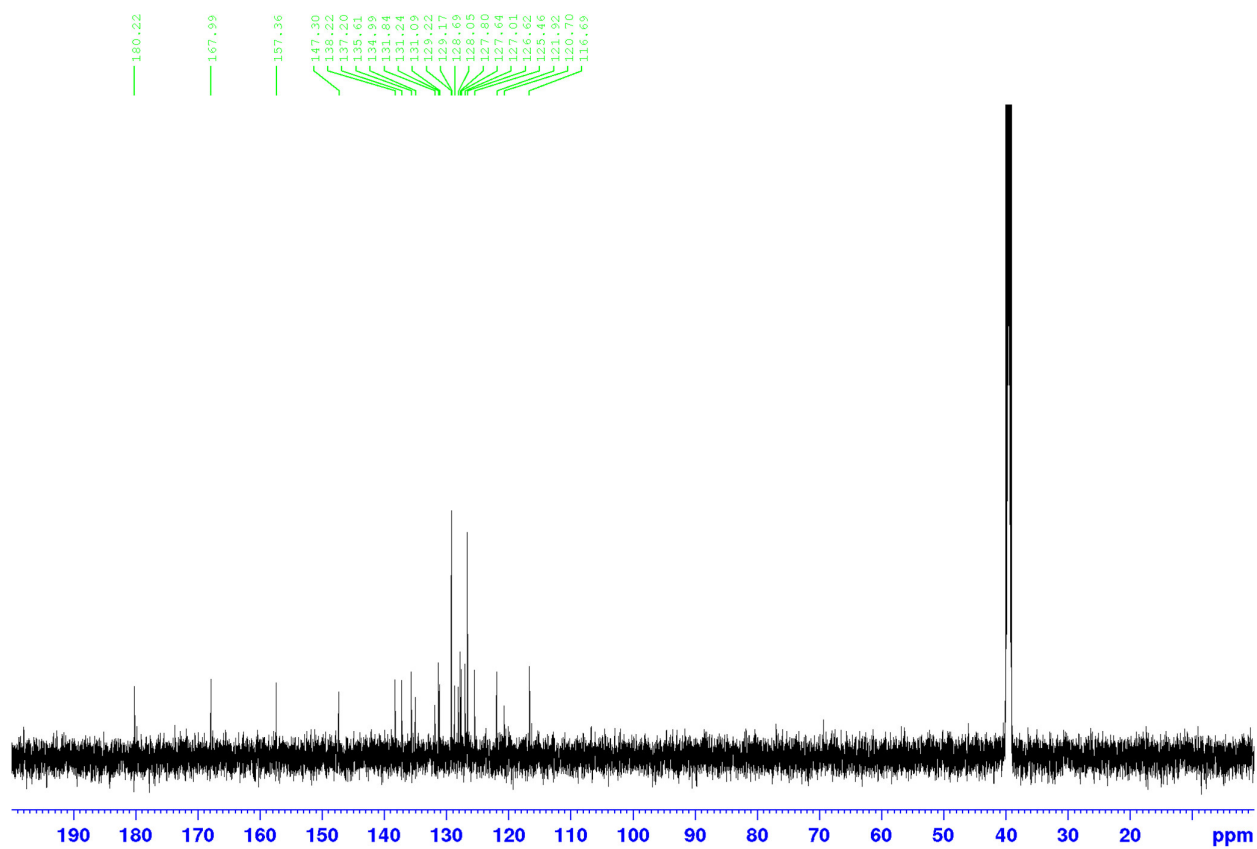

*N*-(3-(2-((3-(Dimethylamino)propyl)amino)-2-oxoacetyl)-[1,1'-biphenyl]-4-yl)-2-naphthamide (**25**)

<sup>1</sup>H NMR (600 MHz, CDCl<sub>3</sub>):

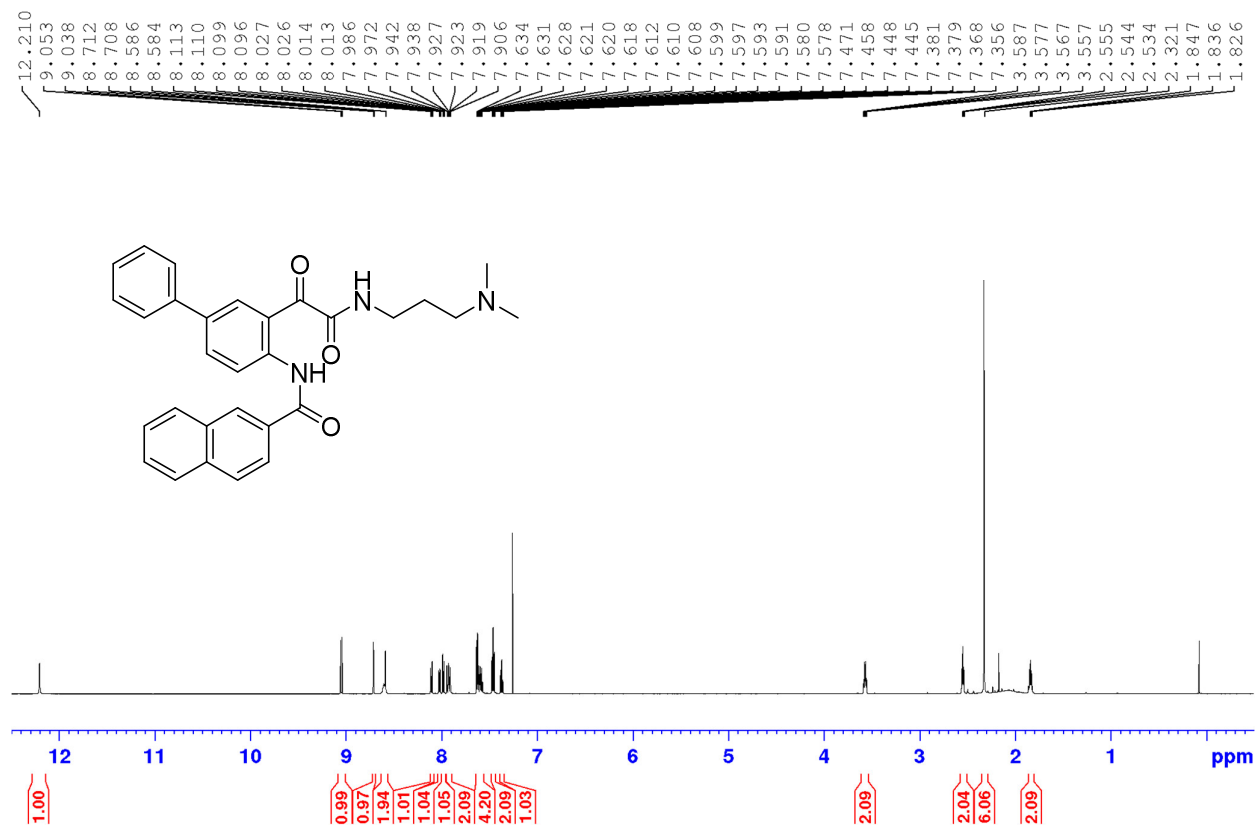

<sup>13</sup>C NMR (150 MHz, CDCl<sub>3</sub>):

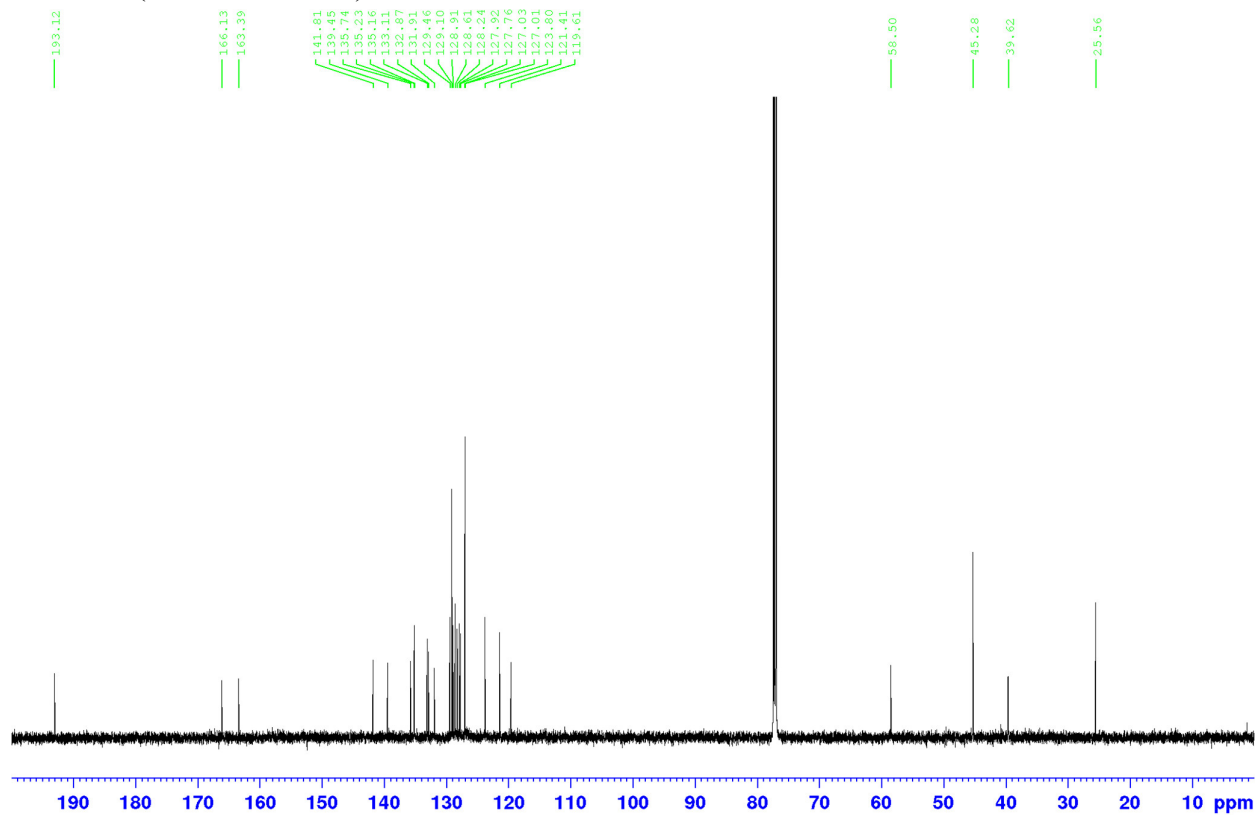

3-(2-(4-(2-Naphthamido)-[1,1'-biphenyl]-3-yl)-2-oxoacetamido)-*N,N*-dimethylpropan-1-aminium chloride (**26**)

$^1\text{H}$  NMR (600 MHz,  $\text{DMSO-}d_6$ ):

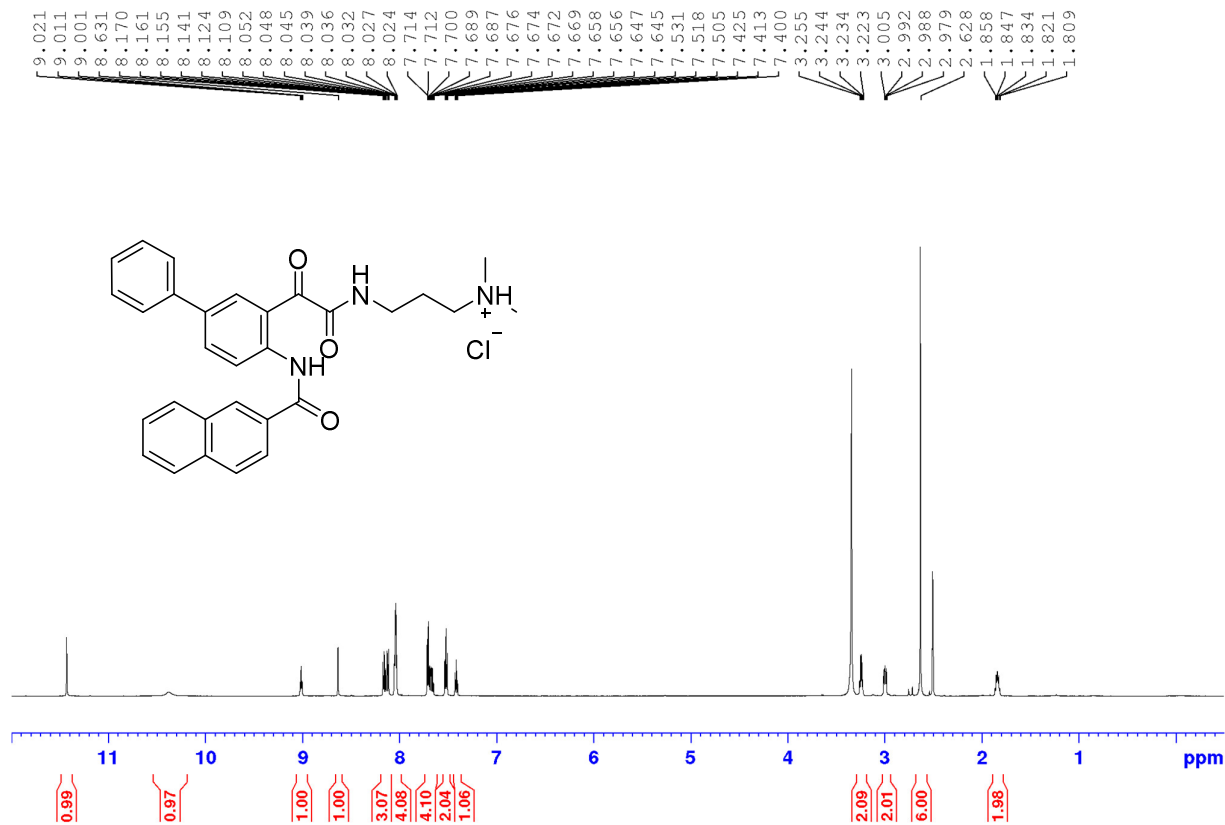

$^{13}\text{C}$  NMR (150 MHz,  $\text{DMSO-}d_6$ ):

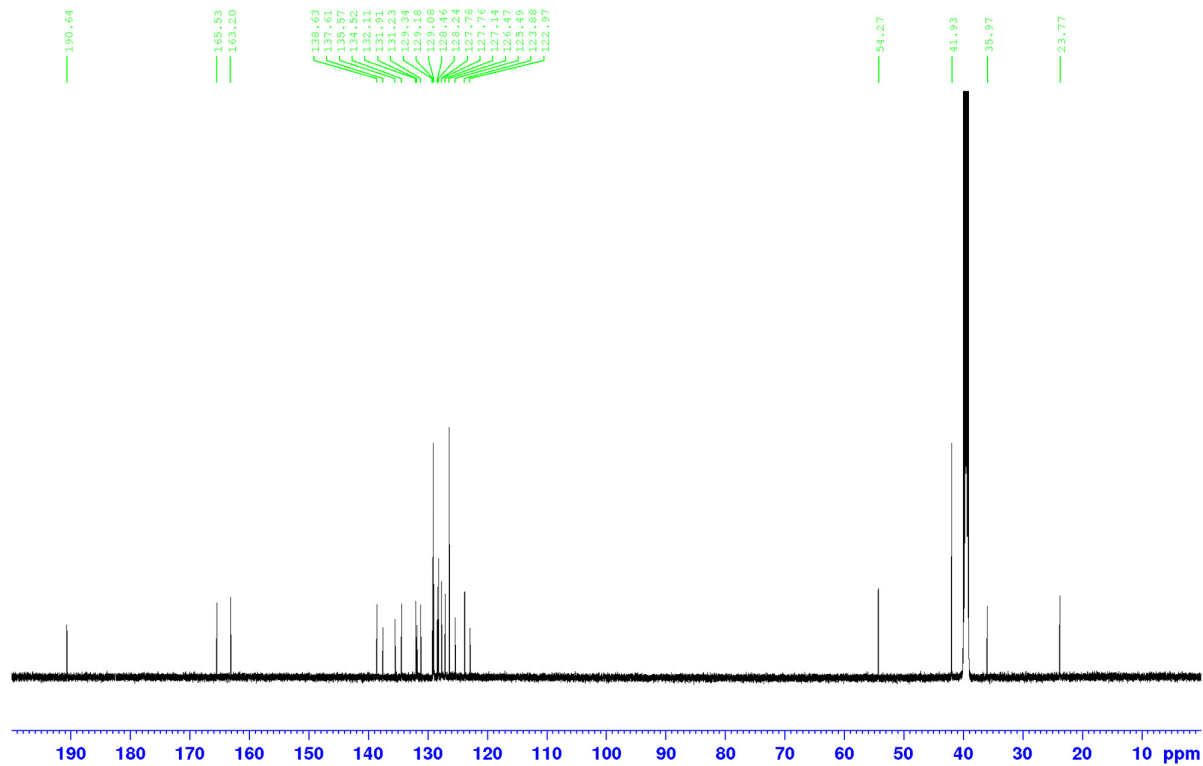

3-(2-(4-(2-Naphthamido)-[1,1'-biphenyl]-3-yl)-2-oxoacetamido)-*N,N,N*-trimethylpropan-1-aminium iodide (**27**)

$^1\text{H}$  NMR (600 MHz,  $\text{DMSO-}d_6$ ):

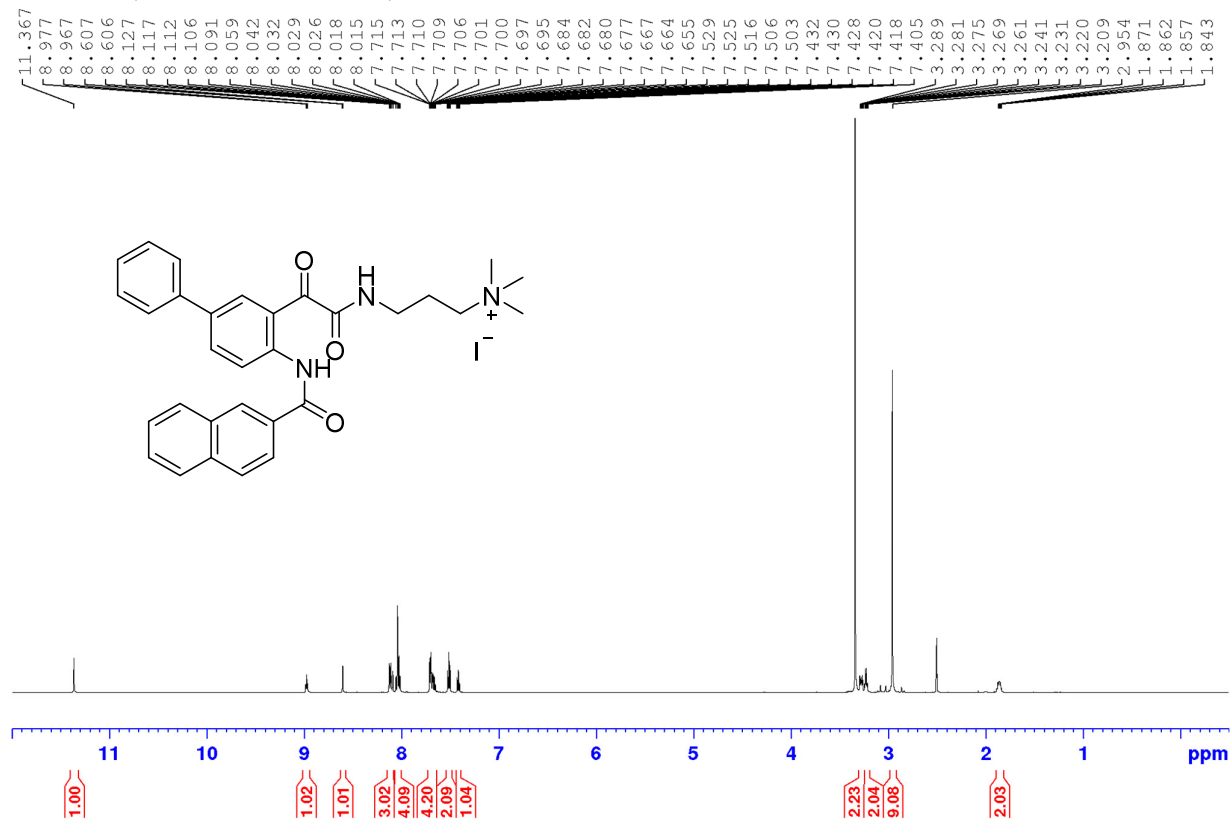

$^{13}\text{C}$  NMR (150 MHz,  $\text{DMSO-}d_6$ ):

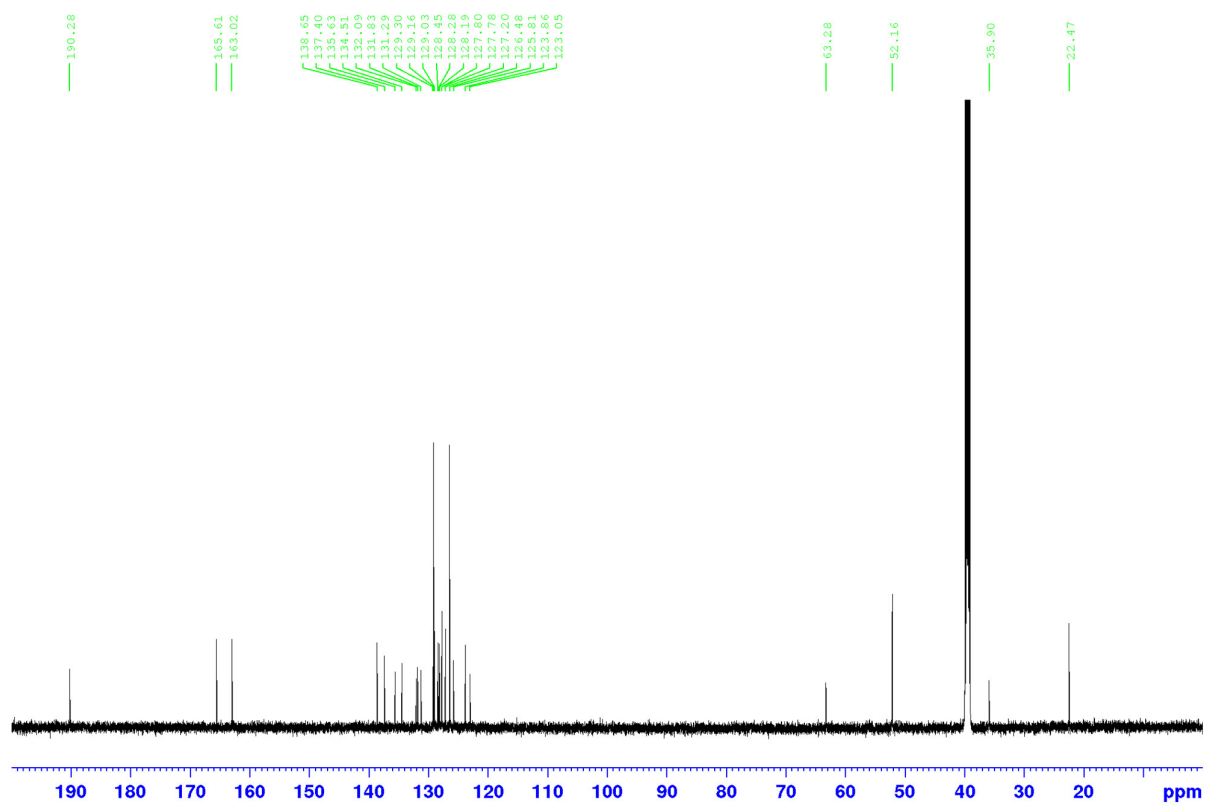

Supplement: ijms-21-06789-s001.pdf [file ijms-21-06789-s001.pdf]
